# Supplementary material for: Transferrin receptor 1-mediated iron uptake regulates bone mass in mice via osteoclast mitochondria and cytoskeleton
Source: eLife. 2022 Jun 27;11:e73539. doi: 10.7554/eLife.73539 (PMC9352353; doi:10.7554/eLife.73539)
Supplement: Figure 1—source data 1. [file elife-73539-fig1-data1.xlsx]

## Sheet: Figure 1A
	Tfrc	Tfr2	Slc11a2	Slc39a14	Slc46a1	Flvcr2
BMM	1.80808	0.00010058	1.31242	0.345815	0.265141	0.000500294
	1.8218	0.000182266	1.27484	0.37461	0.264305	0.000582622
	1.80955	0.000112483	1.19626	0.36507	0.238444	0.000335582
pOC	2.44172	0.00025003	0.694278	0.0514145	0.190303	0.00043232
	2.22901	0.000155171	0.699424	0.050687	0.196677	0.000628908
	2.56619	0.000150395	0.686654	0.0523758	0.208636	0.000382355
OC	56.5967	0.000843906	3.03537	0.0873042	0.397524	0.000341955
	53.3682	0.000764878	2.86988	0.03971	0.399702	0.000384557
	49.8833	0.000640938	2.98963	0.0867436	0.39747	0.000292612

## Sheet: Tf-59
	time	50	110	190	300
con		0.0009	0.0021	0.0043	0.0056
		0.0011	0.0023	0.0042	0.0055
		0.0009	0.0023	0.0041	0.0061
cKO		0.00011	0.00015	0.00031	0.00027
		7e-05	0.00017	0.00032	0.0003
		0.0001	0.00016	0.00029	0.00031

## Sheet: total iron
	ng/ug		ng/ug		ng/ug
con BMM	0.114083	con pOC	0.123137	con OC	0.786758
	0.109383		0.123137		0.930151
	0.109383		0.132511		0.958068
cKO	0.126311	cKO	0.124918	cKO	0.343437
	0.108441		0.124918		0.349872
	0.108441		0.129337		0.356308
