# Supplementary material for: Transferrin receptor 1-mediated iron uptake regulates bone mass in mice via osteoclast mitochondria and cytoskeleton
Source: eLife. 2022 Jun 27;11:e73539. doi: 10.7554/eLife.73539 (PMC9352353; doi:10.7554/eLife.73539)
Supplement: Figure 2—figure supplement 1—source data 1. [file elife-73539-fig2-figsupp1-data1.xlsx]

## Sheet: Sheet1
	BV/TV	%	Tb.N	Tb.Th	Tb.Sp
m wt;wt
	0.1331	13.31	5.3438	0.0443	0.1806
	0.1221	12.21	4.9875	0.0451	0.1937
	0.15	15	5.2819	0.0465	0.181
m f/f;wt	0.127	12.7	5.0481	0.0445	0.1897
	0.1106	11.06	4.8136	0.041	0.2026
	0.1421	14.21	4.839	0.0477	0.2028
m wt;c/c	0.1539	15.39	5.5896	0.0446	0.1707
	0.1268	12.68	5.2735	0.0424	0.1831
	0.1096	10.96	4.7033	0.0433	0.2067
	0.1323	13.23	5.1868	0.0427	0.1883
f wt;wt	0.1262	12.62	4.6421	0.0484	0.2129
	0.1054	10.54	4.2873	0.0441	0.2286
	0.1024	10.24	4.2964	0.0486	0.2276
f f/f;wt	0.1032	10.32	4.0738	0.048	0.242
	0.0983	9.83	4.5435	0.0452	0.2202
	0.1076	10.76	4.3316	0.0453	0.2278
	0.1355	13.55	4.7746	0.0532	0.2051
f wt;c/c	0.1061	10.61	4.0433	0.0487	0.2446
	0.1144	11.44	4.2506	0.0493	0.2321
	0.1158	11.58	4.4324	0.0484	0.2237
	0.1054	10.54	4.377	0.0444	0.2243
