# Supplementary material for: Transferrin receptor 1-mediated iron uptake regulates bone mass in mice via osteoclast mitochondria and cytoskeleton
Source: eLife. 2022 Jun 27;11:e73539. doi: 10.7554/eLife.73539 (PMC9352353; doi:10.7554/eLife.73539)
Supplement: Figure 2—figure supplement 2—source data 1. [file elife-73539-fig2-figsupp2-data1.xlsx]

## Sheet: Sheet1
male								female
		BW	BV/TV	Tb.N	Tb.Th	Tb.Sp			BW	BV/TV	Tb.N	Tb.Th	Tb.Sp
	con							con
	10	24	24.81	6.2445	0.058	0.1534		6	18.6	11.32	4.2869	0.0481	0.2339
	11	24	30.77	6.9322	0.0592	0.1404		23	19.4	9.91	4.245	0.045	0.2317
	14	24	26.95	6.3019	0.063	0.1582		33	18.7	13.23	4.8207	0.0467	0.2073
	17	22.2	16.99	5.7219	0.0471	0.1666		36	20.5	14.61	5.3057	0.0449	0.1832
	28	22.5	18.69	5.8306	0.0498	0.1678
	37	25.1	25.32	6.7758	0.0497	0.1372
	38	25.9	26.2	6.2035	0.0605	0.1526
	44	24.2	23.04	5.8289	0.0577	0.1648
male								female
	cKO;c/+							cKO;c/+
	4	22.8	20.73	5.489	0.0574	0.178		34	18.9	13.36	4.8769	0.0484	0.2038
	8	23.1	22.87	6.2506	0.0553	0.1538		40	19.2	13.59	4.8162	0.0477	0.2076
	9	25.6	27.17	6.3325	0.057	0.1486		41	19.9	17.29	5.4722	0.0493	0.1822
	13	24	22.3	6.0056	0.0553	0.1608		42	19.8	15.65	5.206	0.0484	0.1898
	20	26.4	27.24	6.2733	0.0588	0.1518
	21	26.2	29.79	6.5124	0.0611	0.1474
	22	25	30.21	6.6278	0.0617	0.1455
	39	25.8	31.97	6.7421	0.0639	0.1347
	43	25.5	23.53	5.8827	0.0563	0.1612
	45	21.8	20.6	5.8222	0.0512	0.1651
	46	24.2	20.15	5.9556	0.0512	0.1606
	47	23.6	25.94	6.306	0.056	0.1513
	48	23	19.71	6.3042	0.0495	0.1531
