# Supplementary material for: Transferrin receptor 1-mediated iron uptake regulates bone mass in mice via osteoclast mitochondria and cytoskeleton
Source: eLife. 2022 Jun 27;11:e73539. doi: 10.7554/eLife.73539 (PMC9352353; doi:10.7554/eLife.73539)
Supplement: Figure 2—figure supplement 3—source data 1. [file elife-73539-fig2-figsupp3-data1.xlsx]

## Sheet: serum iron
m con	m cKO	f con	f cKO	ug/dl
113.065	139.881	95.2381	107.143
150.754	181.548	125	148.81
155.779	116.071	122.024	142.857
168.342	119.048	157.738	127.976

## Sheet: serum Hepcidin
m con	m cKO	f con	f cKO	nmol/L
105.942	140.611	132.446	124.609
140.885	200.993	101.776	116.524
168.666	135.846	100.055	110.68
75.7579	125.948	192.977	226.795

## Sheet: RBC count
m con	m cKO	f con	f cKO	106 /ul
9.2	10.4	9.9	10
9.6	9.3	9.3	9.7
8.5	8	8.9	8.9
10.2	9.4	8.1	8.3
