# Supplementary material for: Transferrin receptor 1-mediated iron uptake regulates bone mass in mice via osteoclast mitochondria and cytoskeleton
Source: eLife. 2022 Jun 27;11:e73539. doi: 10.7554/eLife.73539 (PMC9352353; doi:10.7554/eLife.73539)
Supplement: Figure 2—figure supplement 4—source data 1. [file elife-73539-fig2-figsupp4-data1.xlsx]

## Sheet: Tb.BVTV
male
3w			10w			6m
con	cKO		con	cKO		con	cKO
14.3	19.11		24.81	25.6		23.26	18.5
16.63	24.47		30.77	26.38		22.96	23.67
15.09	23.07		26.95	27.94		27.93	22.14
19.14	16.54		16.99	16.24		20.44	22.11
7.98	24.66		18.69	25.39		22.88	18.43
12.4	10.21		25.32	24.68		23.48	19.28
20.45	21.94		26.2	32.97		20.37	16.31
21.67	18.59		23.04
13.98	23.12		24.11
	21.09		18.53
	20.43		25.74
	19.86		17.96
			24.47

## Sheet: Tb.N
male
3w			10w			6m
con	cKO		con	cKO		con	cKO
3.6798	4.7832		6.2445	6.0928		5	4
4.5128	5.9293		6.9322	6.5611		6	6
4.7039	4.4418		6.3019	6.8649		6	5
4.8463	4.4897		5.7219	5.4204		5	5
3.054	5.5698		5.8306	6.15		5	5
2.9769	5.5427		6.7758	6.041		5	4
4.1173	4.4401		6.2035	6.7691		5	4
5.2953	5.6651		5.8289
3.2517	4.4198		6.1457
	5.5663		5.5485
	4.2275		6.5387
			5.5755
			6.014

## Sheet: Tb.Th
male
3w			10w			6m
con	cKO		con	cKO		con	cKO
0.039	0.0412		0.058	0.0586		0.075	0.0779
0.0409	0.0438		0.0592	0.0612		0.0672	0.0714
0.0397	0.0488		0.063	0.0602		0.074	0.0719
0.0439	0.0407		0.0471	0.0502		0.0702	0.0685
0.0348	0.045		0.0498	0.0592		0.0684	0.0786
0.0447	0.0392		0.0497	0.0596		0.066	0.0758
0.0488	0.044		0.0605	0.067		0.0676	0.0663
0.0468	0.0424		0.0577
0.0417	0.0442		0.0533
	0.0442		0.0485
	0.0414		0.0512
	0.0409		0.0499
			0.0591

## Sheet: Tb.Sp
male
3w			10w			6m
con	cKO		con	cKO		con	cKO
0.2991	0.2328		0.1534	0.1549		0.2084	0.235
0.2355	0.1864		0.1404	0.1495		0.1782	0.1751
0.2227	0.2584		0.1582	0.1424		0.1756	0.1925
0.2219	0.2418		0.1666	0.179		0.2241	0.1875
0.3332	0.2047		0.1678	0.1554		0.2059	0.2232
0.3596	0.2061		0.1372	0.1575		0.1921	0.2376
0.2654	0.2455		0.1526	0.1395		0.1921	0.2541
0.2021	0.2007		0.1648
0.3314	0.2658		0.1544
	0.1959		0.1731
	0.2637		0.144
			0.1726
			0.1613

## Sheet: Cort.Th
male
3w			10w			6m
con	cKO		con	cKO		con	cKO
0.07	0.079		0.176	0.184		0.211	0.216
0.071	0.07		0.181	0.182		0.217	0.201
0.074	0.075		0.192	0.193		0.214	0.205
0.078	0.07		0.162	0.179		0.209	0.227
0.059	0.061		0.17	0.185		0.212	0.213
	0.075		0.165	0.188		0.205	0.218
	0.066		0.203	0.169		0.214	0.204
	0.067		0.176
	0.061		0.19
	0.07		0.187
	0.065		0.161
	0.055		0.175
			0.208
