# Supplementary material for: Transferrin receptor 1-mediated iron uptake regulates bone mass in mice via osteoclast mitochondria and cytoskeleton
Source: eLife. 2022 Jun 27;11:e73539. doi: 10.7554/eLife.73539 (PMC9352353; doi:10.7554/eLife.73539)
Supplement: Figure 2—figure supplement 5—source data 1. [file elife-73539-fig2-figsupp5-data1.xlsx]

## Sheet: BVTV
10w-female			6m-female
con	cKO		con	cKO
31.02	36.34		30.915	36.12
31.28	30.01		30.3	35.925
30.6	36.35		30.915	35.895
37.1	32.76		32.745	33.06
30.49	30.93		30.36	33.015
32.83	28.97		29.31
35.03	31.68
33.41

## Sheet: Tb.N
10w-female			6m-female
con	cKO		con	cKO
5.3878	6.6545		6	7
5.1277	5.5985		5	8
5.287	6.3057		6	8
6.4707	5.3238		7	7
5.8767	5.8457		6	7
5.6063	5.0179		6
6.2332	6.1118
6.0609

## Sheet: Tb.Th
10w-female			6m-female
con	cKO		con	cKO
0.0548	0.0596		0.0751	0.0616
0.0566	0.0569		0.0738	0.0624
0.0553	0.0585		0.0684	0.0622
0.0577	0.0613		0.069	0.0683
0.055	0.0547		0.0688	0.0624
0.0556	0.0566		0.0752
0.058	0.0579
0.0571

## Sheet: Tb.Sp
10w-female			6m-female
con	cKO		con	cKO
0.1863	0.1499		0.1763	0.1596
0.1976	0.1766		0.2341	0.1529
0.1902	0.1577		0.1949	0.1564
0.1495	0.1854		0.153	0.1643
0.1703	0.165		0.1862	0.1661
0.1716	0.2038		0.2104
0.1586	0.1544
0.1594
