# Supplementary material for: Transferrin receptor 1-mediated iron uptake regulates bone mass in mice via osteoclast mitochondria and cytoskeleton
Source: eLife. 2022 Jun 27;11:e73539. doi: 10.7554/eLife.73539 (PMC9352353; doi:10.7554/eLife.73539)
Supplement: Figure 2—figure supplement 6—source data 1. [file elife-73539-fig2-figsupp6-data1.xlsx]

## Sheet: Sheet1
		body weight	BV/TV	Tb.N	Tb.Th	Tb.Sp	Cort.Th				body weight	BV/TV	Tb.N	Tb.Th	Tb.Sp	Cort.Th
male									female
	HZ-TfC-27		12.99	4.2697	0.0479	0.2347	0.231			HZ-TfC-18	19.7	7.95	2.9547	0.0463	0.3539	0.21
	HZ-TfC-45	22.8	21.57	5.4667	0.0585	0.1749	0.248			HZ-TfC-24	16.5	11.02	4.4481	0.0438	0.2228	0.195
	HZ-TC-47	23.1	14.65	4.2268	0.0511	0.2391	0.23			HZ-TfC-32	19.9	14.08	4.0855	0.0505	0.2423	0.216
con	HZ-TC-49	19.3	10.09	3.6663	0.0512	0.2755	0.211		con	HZ-TfC-36	21.9	11.46	4.1984	0.0473	0.2361	0.207
	HZ-TC-59	26	20.07	4.6935	0.0668	0.209	0.258			HZ-TC-68	22.8	12.61	4.0095	0.0475	0.2496	0.204
	HZ-TfC-98	23.6	16.91	4.7595	0.0542	0.2067	0.219			HZ-TfC-110	19.5	13.19	3.8139	0.0484	0.2639	0.198
	HZ-TC-69	21.8	16.64	4.7317	0.0514	0.2097	0.217			HZ-TfC-113	17.8	14.97	3.6472	0.0539	0.2828	0.203
										HZ-TC-83	14	15.76	4.5255	0.0479	0.2179	0.19
	HZ-TfC-2	25.6	41.76	4.9985	0.0824	0.2163	0.245			HZ-TfC-37	19.8	51.2	7.9111	0.0665	0.1095	0.212
	HZ-TfC-42	26.1	50.46	6.8953	0.0757	0.1243	0.204			HZ-TfC-38	21.5	43.34	5.9684	0.0666	0.1782	0.212
	HZ-TC-48	20.3	39.86	5.306	0.1041	0.201	0.203			HZ-TC-52	20	58.27	8.1421	0.0786	0.1078	0.25
	HZ-TfC-90	26.1	36.25	5.0008	0.0673	0.2037	0.222			HZ-TC-61	17.9	62.94	8.8563	0.0776	0.081	0.222
	HZ-TfC-92	27.5	46.48	6.2521	0.0756	0.1418	0.221		cKO	HZ-TC-66	21.2	45.97	7.0445	0.0629	0.1463	0.212
cKO	HZ-TfC-93	22.3	59.85	8.1113	0.0759	0.1111	0.228			HZ-TfC-89	29.8	64.88	7.659	0.0929	0.1065
	HZ-TfC-102	20.9	32.64	5.2678	0.0631	0.1796	0.203			HZ-TfC-97	21.2	56.25	6.5809	0.0823	0.1708	0.245
	HZ-TfC-104	24.1	36.16	5.4203	0.0681	0.1871	0.237			HZ-TfC-116	18.8	48.88	5.8073	0.0727	0.1914	0.212
	HZ-TfC-107	24	28.04	3.9808	0.0681	0.2543	0.228			HZ-TC-74	19.6	50.59	6.4111	0.0687	0.1647	0.202
	HZ-TC-60	25.9	49.41	7.1082	0.0833	0.1208	0.237
