# Supplementary material for: Transferrin receptor 1-mediated iron uptake regulates bone mass in mice via osteoclast mitochondria and cytoskeleton
Source: eLife. 2022 Jun 27;11:e73539. doi: 10.7554/eLife.73539 (PMC9352353; doi:10.7554/eLife.73539)
Supplement: Figure 2—figure supplement 7—source data 1. [file elife-73539-fig2-figsupp7-data1.xlsx]

## Sheet: uCT
		male									female
con	BV/TV	Tb.N	Tb.Th	Tb.Sp					con	BV/TV	Tb.N	Tb.Th	Tb.Sp
HZ-TfC-27	30.35	5.9467	0.0497	0.1591					HZ-TfC-18	31.3	4.9624	0.0525	0.2026
HZ-TfC-45	29.22	5.4606	0.0524	0.1747					HZ-TfC-24	26.88	5.2132	0.0482	0.1845
HZ-TC-47	33.53	5.7676	0.0537	0.1628					HZ-TfC-32	33.24	5.3306	0.0561	0.177
HZ-TC-49	22.96	4.5039	0.0493	0.2175					HZ-TfC-36	35.51	5.2819	0.0582	0.1909
HZ-TC-59	35.49	5.9609	0.0559	0.1571					HZ-TC-68	29.43	5.029	0.052	0.1952
HZ-TfC-98	36.24	5.4959	0.0572	0.1742					HZ-TfC-110	28.14	5.0064	0.0501	0.1952
HZ-TC-69	33.32	5.8863	0.054	0.1583					HZ-TfC-113	29.1	5.5912	0.0497	0.172
									HZ-TC-83	34.09	6.0447	0.0532	0.1539
cKO	BV/TV	Tb.N	Tb.Th	Tb.Sp					cKO	BV/TV	Tb.N	Tb.Th	Tb.Sp
HZ-TfC-2	39.99	5.6297	0.066	0.1616					HZ-TfC-37	29.09	4.6879	0.0567	0.2074
HZ-TfC-42	41.71	6.1696	0.0676	0.143					HZ-TfC-38	35.76	4.9185	0.0614	0.1999
HZ-TC-48	30.71	5.8551	0.0537	0.1591					HZ-TC-52	34.91	5.5477	0.0578	0.1709
HZ-TfC-89	44.15	5.3682	0.0716	0.1688					HZ-TC-61	45.29	6.6371	0.0626	0.1404
HZ-TfC-90	29.94	5.0068	0.0593	0.1847					HZ-TC-66	32.6	5.7095	0.0559	0.1644
HZ-TfC-92	38.49	5.934	0.0623	0.1526					HZ-TfC-97	38.5	5.754	0.0624	0.1593
HX-TfC-93	40.96	5.7951	0.0661	0.158					HZ-TfC-116	28.34	5.1957	0.0529	0.1864
HZ-TfC-102	32.45	5.6984	0.058	0.1608					HZ-TC-74	34.3	5.8039	0.0589	0.158
HZ-TfC-104	33.79	6.142	0.0582	0.1479
HZ-TfC-107	27.46	5.3035	0.0567	0.1776
HZ-TC-60	39.94	6.0139	0.0645	0.1461
