# Supplementary material for: Transferrin receptor 1-mediated iron uptake regulates bone mass in mice via osteoclast mitochondria and cytoskeleton
Source: eLife. 2022 Jun 27;11:e73539. doi: 10.7554/eLife.73539 (PMC9352353; doi:10.7554/eLife.73539)
Supplement: Figure 2—figure supplement 8—source data 1. [file elife-73539-fig2-figsupp8-data1.xlsx]

## Sheet: Tfr1
	RAW	MRPS2				Tfr1				∆Cq Tfr1				2^-∆Cq Tfr1
		control	con+E2	cko	cko+E2	control	con+E2	cko	cko+E2	control	con+E2	cko	cko+E2	control	con+E2	cko	cko+E2
	BMM-1	28.0628	28.3979	29.6341	27.3615	26.1242	25.4566	36.8779	33.1288	-1.93862	-2.94134	7.24384	5.76735	3.83338	7.68122	0.00659761	0.0183593
	BMM-2	28.4655	27.9751	29.709	28.3322	26.7457	25.1387	36.9072	33.8326	-1.71979	-2.83636	7.19823	5.50037	3.29389	7.14218	0.00680952	0.0220915
	BMM-3	28.8842	28.0852	28.6525	27.9247	27.0025	25.1329	36.4125	33.3704	-1.88166	-2.95228	7.75993	5.44569	3.68498	7.73972	0.00461348	0.0229448
	pOC-1	25.5451	25.9902	26.6599	26.3649	22.5604	21.6059	30.2465	27.5115	-2.98466	-4.38435	3.58658	1.14659	7.91539	20.8844	0.08324	0.45169
	pOC-2	26.2195	25.9718	25.8644	25.9403	23.2467	21.5295	29.5434	27.1631	-2.97285	-4.4423	3.67898	1.22278	7.85086	21.7403	0.0780759	0.428456
	pOC-3	25.6462	26.8216	26.4819	27.3014	22.6556	22.5834	29.8832	28.3805	-2.99061	-4.2382	3.4013	1.07908	7.94811	18.8723	0.0946472	0.473331
	OC-1	26.0735	26.0641	26.3286	26.2283	19.7706	20.1308	27.2138	26.1814	-6.30292	-5.9333	0.885178	-0.0469473	78.9531	61.1083	0.541421	1.03308
	OC-2	26.3745	26.0675	27.1398	25.8959	20.0018	19.9131	28.0349	25.8614	-6.37262	-6.15446	0.895097	-0.0345022	82.8609	71.2322	0.537711	1.0242
	OC-3	26.7576	25.9211	26.9143	26.4794	20.344	20.0565	27.6637	26.1246	-6.4136	-5.86452	0.749387	-0.354837	85.2483	58.2635	0.594856	1.27884
	RAW	MRPS2				Tfr1				∆Cq Tfr1				2^-∆Cq Tfr1
		control	con+DHT	cko	cko+DHT	control	con+DHT	cko	cko+DHT	control	con+DHT	cko	cko+DHT	control	con+DHT	cko	cko+DHT
	BMM-1	26.6227	26.9775	26.7517	26.9372	24.3715	24.5278	29.5522	29.7869	-2.25117	-2.44977	2.80054	2.84965	4.76069	5.46329	0.143533	0.13873
	BMM-2	26.6088	26.5389	30.0335	27.4827	24.3944	24.3127	32.6244	30.3175	-2.21435	-2.22615	2.59088	2.83475	4.64071	4.67885	0.165985	0.14017
	BMM-3	26.4184	26.4754	27.234	27.3882	24.4094	24.273	30.0919	30.5048	-2.00897	-2.20244	2.8579	3.11665	4.02494	4.60256	0.137939	0.115291
	pOC-1	26.2259	26.8043	26.9503	27.4178	22.4333	22.5738	25.6193	25.9592	-3.7926	-4.23052	-1.33099	-1.45869	13.8576	18.7722	2.51575	2.74858
	pOC-2	26.3923	26.335	27.2579	26.5648	22.4091	21.9513	26.0535	25.1431	-3.9832	-4.38368	-1.20431	-1.42175	15.8147	20.8746	2.30428	2.6791
	pOC-3	26.3051	26.7217	28.4844	28.1076	22.48	22.3694	27.1601	26.5216	-3.82508	-4.35231	-1.32431	-1.586	14.1731	20.4256	2.50413	3.00216
	OC-1	27.5761	28.4238	28.1656	28.809	21.8469	23.0437	25.3906	26.1718	-5.72912	-5.38011	-2.77501	-2.63718	53.044	41.646	6.8448	6.22112
	OC-2	27.4524	27.7968	27.6896	27.6798	21.9228	22.1998	24.75	25.1054	-5.5296	-5.59694	-2.93955	-2.57439	46.193	48.4002	7.67173	5.95617
	OC-3	28.4342	27.2733	27.7148	29.0012	23.0032	21.7044	24.9366	25.9831	-5.43096	-5.56883	-2.77815	-3.01808	43.1403	47.4663	6.85974	8.1009

## Sheet: Fpn
	RAW	MRPS2				Fpn				∆Cq Fpn				2^-∆Cq Fpn
		control	con+E2	cko	cko+E2	control	con+E2	cko	cko+E2	control	con+E2	cko	cko+E2	control	con+E2	cko	cko+E2
	BMM-1	28.0628	28.3979	29.6341	27.3615	25.1556	25.4315	26.0232	24.3978	-2.90724	-2.9664	-3.61088	-2.96372	7.50181	7.81585	12.2175	7.80132
	BMM-2	28.4655	27.9751	29.709	28.3322	25.046	25.1317	26.2422	25.4921	-3.41943	-2.84335	-3.46682	-2.84016	10.6992	7.17686	11.0565	7.16101
	BMM-3	28.8842	28.0852	28.6525	27.9247	25.5479	25.1838	24.9893	25.1821	-3.33627	-2.9014	-3.66326	-2.74253	10.0999	7.47151	12.6693	6.69244
	pOC-1	25.5451	25.9902	26.6599	26.3649	28.5375	27.5602	28.9211	28.1212	2.99247	1.56996	2.26117	1.75631	0.125654	0.336817	0.208603	0.296004
	pOC-2	26.2195	25.9718	25.8644	25.9403	28.9382	27.2504	28.6265	27.5118	2.71865	1.27855	2.76206	1.5715	0.151916	0.412209	0.147414	0.336458
	pOC-3	25.6462	26.8216	26.4819	27.3014	28.4966	28.5317	29.0778	28.4912	2.85043	1.71009	2.59591	1.18983	0.138654	0.305641	0.165406	0.438355
	OC-1	26.0735	26.0641	26.3286	26.2283	27.2156	27.124	27.5877	27.258	1.14206	1.05991	1.25909	1.02962	0.453112	0.479661	0.417808	0.489838
	OC-2	26.3745	26.0675	27.1398	25.8959	28.027	27.6337	28.1786	27.2565	1.65257	1.56617	1.03886	1.36059	0.318074	0.337703	0.486713	0.389423
	OC-3	26.7576	25.9211	26.9143	26.4794	27.975	27.6788	28.1048	27.8535	1.2174	1.75771	1.19055	1.37414	0.430056	0.295717	0.438136	0.385783
	RAW	MRPS2				Tfr1				∆Cq Tfr1				2^-∆Cq Tfr1
		control	con+DHT	cko	cko+DHT	control	con+DHT	cko	cko+DHT	control	con+DHT	cko	cko+DHT	control	con+DHT	cko	cko+DHT
	BMM-1	26.6227	26.9775	26.7517	26.9372	21.996	22.1105	22.1427	22.2782	-4.62667	-4.86701	-4.60894	-4.65902	24.7039	29.182	24.4022	25.2641
	BMM-2	26.6088	26.5389	30.0335	27.4827	21.9831	21.9079	25.8707	23.1156	-4.62573	-4.63102	-4.16285	-4.36717	24.6879	24.7786	17.912	20.6371
	BMM-3	26.4184	26.4754	27.234	27.3882	21.9912	22.1004	22.9099	23.1694	-4.42724	-4.37505	-4.32411	-4.21878	21.5145	20.7501	20.0302	18.6199
	pOC-1	26.2259	26.8043	26.9503	27.4178	25.5815	26.1237	26.6657	27.2098	-0.644341	-0.680617	-0.28457	-0.20803	1.56303	1.60282	1.21805	1.15511
	pOC-2	26.3923	26.335	27.2579	26.5648	25.6338	25.5407	26.7663	26.3272	-0.758456	-0.794267	-0.491589	-0.237633	1.69168	1.7342	1.40599	1.17906
	pOC-3	26.3051	26.7217	28.4844	28.1076	25.4742	26.0737	28.0219	27.8844	-0.830917	-0.64798	-0.462502	-0.223222	1.77882	1.56697	1.37793	1.16734
	OC-1	27.5761	28.4238	28.1656	28.809	23.9639	24.9974	24.9513	25.7433	-3.61217	-3.4264	-3.21432	-3.06564	12.2285	10.751	9.28128	8.37238
	OC-2	27.4524	27.7968	27.6896	27.6798	24.2989	24.473	24.4015	24.5543	-3.15352	-3.32373	-3.28812	-3.12553	8.89825	10.0125	9.7684	8.72728
	OC-3	28.4342	27.2733	27.7148	29.0012	24.9536	23.9074	24.1441	25.619	-3.4806	-3.3659	-3.57068	-3.38218	11.1626	10.3095	11.8818	10.4265

## Sheet: Cox1
	RAW	MRPS2				Cox-I				∆Cq Cox-I				2^-∆Cq Cox-I
		control	con+E2	cko	cko+E2	control	con+E2	cko	cko+E2	control	con+E2	cko	cko+E2	control	con+E2	cko	cko+E2
	BMM-1	28.0628	28.3979	29.6341	27.3615	23.1556	23.2492	23.9591	23.5116	-4.9072	-5.14875	-5.67502	-3.84987	30.0064	35.4755	51.0919	14.4187
	BMM-2	28.4655	27.9751	29.709	28.3322	23.4081	22.7836	23.7579	23.9323	-5.05736	-5.19149	-5.95108	-4.39993	33.2979	36.5421	61.8662	21.1111
	BMM-3	28.8842	28.0852	28.6525	27.9247	23.8773	22.9241	22.7356	23.4257	-5.00689	-5.16108	-5.91691	-4.49894	32.1533	35.78	60.418	22.6108
	pOC-1	25.5451	25.9902	26.6599	26.3649	21.0614	20.6431	21.7188	21.932	-4.48366	-5.34716	-4.94106	-4.43292	22.3725	40.7058	30.7189	21.5994
	pOC-2	26.2195	25.9718	25.8644	25.9403	21.5482	20.66	20.9921	21.676	-4.67131	-5.31183	-4.87232	-4.26433	25.4803	39.7209	29.2896	19.2172
	pOC-3	25.6462	26.8216	26.4819	27.3014	21.0155	21.5425	21.5064	22.6514	-4.63067	-5.27914	-4.97554	-4.64999	24.7726	38.8311	31.4621	25.1066
	OC-1	26.0735	26.0641	26.3286	26.2283	18.2913	20.7023	18.5517	21.3191	-7.78217	-5.36183	-7.77692	-4.90922	220.123	41.1217	219.325	30.0485
	OC-2	26.3745	26.0675	27.1398	25.8959	18.7603	20.5052	19.3235	21.0333	-7.61415	-5.56237	-7.81626	-4.86261	195.924	47.2542	225.386	29.0933
	OC-3	26.7576	25.9211	26.9143	26.4794	18.9532	20.5647	19.0981	21.8307	-7.80449	-5.35633	-7.81622	-4.64873	223.556	40.9652	225.381	25.0847
	RAW	MRPS2				Cox-I				∆Cq Cox-I				2^-∆Cq Cox-I
		control	con+DHT	cko	cko+DHT	control	con+DHT	cko	cko+DHT	control	con+DHT	cko	cko+DHT	control	con+DHT	cko	cko+DHT
	BMM-1	26.6227	26.9775	26.7517	26.9372	18.626	19.0651	18.8903	19.2858	-7.99661	-7.91241	-7.86138	-7.65138	255.4	240.919	232.547	201.046
	BMM-2	26.6088	26.5389	30.0335	27.4827	18.7365	18.8312	21.9591	20.0293	-7.87227	-7.70769	-8.07436	-7.45342	234.31	209.048	269.541	175.269
	BMM-3	26.4184	26.4754	27.234	27.3882	18.7861	18.6254	19.5515	19.8804	-7.63235	-7.85003	-7.68252	-7.50775	198.411	230.726	205.433	181.994
	pOC-1	26.2259	26.8043	26.9503	27.4178	17.8716	18.291	19.3121	19.5157	-8.35429	-8.51329	-7.63813	-7.90212	327.26	365.389	199.208	239.208
	pOC-2	26.3923	26.335	27.2579	26.5648	18.0114	18.2748	19.4811	18.6165	-8.38085	-8.0602	-7.77671	-7.94831	333.341	266.908	219.293	246.99
	pOC-3	26.3051	26.7217	28.4844	28.1076	17.9807	18.6947	20.2009	20.0885	-8.32444	-8.02698	-8.28348	-8.01917	320.557	260.832	311.585	259.424
	OC-1	27.5761	28.4238	28.1656	28.809	18.2143	19.5338	19.7663	20.1257	-9.36177	-8.88992	-8.39935	-8.68322	657.92	474.387	337.643	411.064
	OC-2	27.4524	27.7968	27.6896	27.6798	18.3656	18.5667	18.9179	19.2689	-9.08684	-9.23012	-8.77172	-8.41084	543.767	600.542	437.071	340.341
	OC-3	28.4342	27.2733	27.7148	29.0012	19.1551	18.0443	18.8489	19.9496	-9.27904	-9.22895	-8.86591	-9.05156	621.255	600.055	466.557	530.63
