# Supplementary material for: Transferrin receptor 1-mediated iron uptake regulates bone mass in mice via osteoclast mitochondria and cytoskeleton
Source: eLife. 2022 Jun 27;11:e73539. doi: 10.7554/eLife.73539 (PMC9352353; doi:10.7554/eLife.73539)
Supplement: Figure 2—figure supplement 9—source data 1. [file elife-73539-fig2-figsupp9-data1.xlsx]

## Sheet: Sheet1
	Raw Cq		∆Cq	2^∆Cq
	mrps2	Tfrc	Tfrc	Tfrc
Con Ver 1	28.5271	25.3393	-3.18778	9.1121
Con Ver 2	28.7104	25.4687	-3.24168	9.45896
Con Ver 3	28.5801	25.3057	-3.27441	9.67596
cko Ver 1	29.6671	26.9836	-2.6835	6.42412
cko Ver 2	29.882	27.0011	-2.88093	7.36627
cko Ver 3	29.8956	27.0441	-2.85148	7.21743
Con DF 1	31.2787	28.1049	-3.17379	9.02414
Con DF 2	31.3331	28.165	-3.16806	8.98838
Con DF 3	31.5054	28.291	-3.21441	9.28185
cko DF 1	28.8536	27.6271	-1.22652	2.34002
cko DF 2	29.1703	27.4997	-1.67067	3.18362
cko DF 3	29.1316	27.6743	-1.45738	2.74609
