# Supplementary material for: Transferrin receptor 1-mediated iron uptake regulates bone mass in mice via osteoclast mitochondria and cytoskeleton
Source: eLife. 2022 Jun 27;11:e73539. doi: 10.7554/eLife.73539 (PMC9352353; doi:10.7554/eLife.73539)
Supplement: Figure 2—source data 1. [file elife-73539-fig2-data1.xlsx]

## Sheet: Tb.BVTV
female
3w			10w			6m
con	cKO		con	cKO		con-sham	con-OVX	cKO-sham	cKO-OVX
12.89	16.35		11.32	27.92		27.47	25.13	39.3	28.36
12.52	18.32		9.91	27.23		27.52	26.45	36.33	27.7
21.4	24.41		13.23	33.47		34.23	25.43	38.81	28.49
18.41	27.18		14.61	36.34		31.91	24.78	39.02	25.75
17.53	20.25		14.96	32.82		30.56	24.33	43.38	27.81
18.93	17.4		12.53	48.69		29.06
19.33	19.78		12.97	24.28
15.12			12.63	39.81

## Sheet: TB.N
female
3w			10w			6m
con	cKO		con	cKO		con-sham	con-OVX	cKO-sham	cKO-OVX
3.7534	3.6106		4.2869	6.6191		5	5	11	7
3.1991	3.8548		4.245	6.3318		4	5	10	6
5.3475	5.5074		4.8207	7.0035		6	5	12	7
4.4833	5.4609		5.3057	7.5393		5	5	9	6
4.3617	4.6271		5.0109	6.9434		5	5	12	6
5.0745	4.6694		4.7292	8.4682		5
4.7038	4.4857		4.6993	6.0288
3.7772			4.6224	7.8054

## Sheet: Tb.Th
female
3w			10w			6m
con	cKO		con	cKO		con-sham	con-OVX	cKO-sham	cKO-OVX
0.0387	0.0423		0.0481	0.0537		0.052	0.054	0.0455	0.0489
0.0385	0.044		0.045	0.0546		0.0656	0.052	0.0495	0.05
0.0434	0.0454		0.0467	0.0583		0.0674	0.0543	0.0437	0.0489
0.0429	0.0559		0.0449	0.0596		0.0626	0.0556	0.0528	0.056
0.0421	0.0477		0.0486	0.0574		0.0677	0.0576	0.0488	0.0578
0.0419	0.0448		0.0462	0.0661
0.0433	0.0453		0.0489	0.0555
0.0423			0.0483	0.0635

## Sheet: Tb.Sp
female
3w			10w			6m
con	cKO		con	cKO		con-sham	con-OVX	cKO-sham	cKO-OVX
0.2809	0.3021		0.2339	0.1531		0.2548	0.2515	0.1313	0.1851
0.334	0.2856		0.2317	0.1534		0.3348	0.2769	0.1345	0.2133
0.2047	0.2026		0.2073	0.1447		0.2194	0.2535	0.1054	0.1896
0.2445	0.208		0.1832	0.1307		0.2507	0.2597	0.1483	0.2034
0.2439	0.234		0.1937	0.1421		0.266	0.259	0.1095	0.2136
0.218	0.2308		0.2078	0.1284		0.2834
0.2286	0.2443		0.2072	0.1622
0.2835			0.2119	0.1296

## Sheet: Cort.Th
female
3w			10w			6m
con	cKO		con	cKO		con-sham	con-OVX	cKO-sham	cKO-OVX
0.071	0.067		0.163	0.158		0.163	0.163	0.14	0.155
0.066	0.063		0.162	0.17		0.163	0.1778	0.163	0.17
0.074	0.081		0.159	0.173		0.1778	0.154	0.155	0.142
0.075	0.074		0.157	0.168		0.154	0.167	0.17	0.139
0.081	0.07		0.174	0.167		0.168	0.157	0.142	0.2042
0.079			0.164	0.168		0.167
0.074			0.176	0.161
			0.164	0.172
