# Supplementary material for: Transferrin receptor 1-mediated iron uptake regulates bone mass in mice via osteoclast mitochondria and cytoskeleton
Source: eLife. 2022 Jun 27;11:e73539. doi: 10.7554/eLife.73539 (PMC9352353; doi:10.7554/eLife.73539)
Supplement: Figure 3—figure supplement 1—source data 1. [file elife-73539-fig3-figsupp1-data1.xlsx]

## Sheet: histomorphometry
male con	BV/TV	Tb.N	Tb.Th	Tb.Sp	Oc.S/BS	BS	Oc.S
TFR1 #10	17.71	4.1411	42.7665	198.715	19.6247	0.1771	0.0347553
TFR1 #11	14.5424	4.836	30.0708	176.71	13.4943	0.145424	0.019624
TRF1 #14	13.7921	3.3533	41.1297	257.082	18.5262	0.137921	0.0255515
TFR1 #50	11.6512	3.5801	32.5442	246.776	12.332	0.116512	0.0143683
TFR1 #51	12.1857	4.1279	29.5202	212.732	15.423	0.121857	0.018794
TFR1 #57	12.7048	3.5048	36.2503	249.076	14.2805	0.127048	0.0181431
male cKO	BV/TV	Tb.N	Tb.Th	Tb.Sp	Oc.S/BS	BS	Oc.S
TFR1 #12	10.6884	2.8293	37.7777	315.668	24.1084	0.106884	0.025768
TFR1 #15	16.9648	4.1638	40.7437	199.423	23.4165	0.169648	0.0397256
TRF1 #2	11.6278	3.4683	33.5254	254.797	15.3404	0.116278	0.0178375
TFR1 #52	7.9652	2.9547	26.9577	311.485	15.4057	0.079652	0.0122709
TRF1 #56	10.2248	2.9981	34.1047	299.443	15.7432	0.102248	0.0160971
TFR1 #58	8.3121	3.0222	27.5039	303.385	14.7411	0.083121	0.0122529

## Sheet: serum marker ELISA
	TRAP5b	CTx-I	P1NP
male con
10	6.244	26.303	44.678
11	4.749	37.172	16.164
14	4.221	44.319	32.303
17	5.091	27.117	8.859
28	4.655	34.775	49.46
37	6.721	42.422	36.796
38	4.516	42.576	25.234
44	3.048	38.858	50.258
49	2.34	19.824	26.895
50	2.099	49.589	40.656
51	3.619	49.452	39.516
57	3.372	30.166	55.768
59	1.959	29.164	38.044
male cKO
2	14.803	32.042	32.126
12	7.141	41.645	30.378
15	5.617	48.013	30.323
56	2.3	44.373	41.759
58	2.769	30.983	72.63
64	3.825	47.239	59.492
66	2.243	26.295	65.882

## Sheet: tetracycline labeling
		BFR	MAR	sL.Pm
	mouse #
	TfR1 10	0.0860028	2.18	3.2345
male con	TfR1 11	0.154307	4.2429	2.1991
	TfR1 14	0.236092	2.9724	3.6899
	TfR1 8	0.12778	2.5047	3.7607
	TfR1 13	0.118941	2.5743	4.1135
male cKO	TfR1 2	0.175794	3.7469	3.787
	TfR1 12	0.206162	2.8239	5.2738
	TfR1 15	0.144464	2.6308	4.1534
