# Supplementary material for: Transferrin receptor 1-mediated iron uptake regulates bone mass in mice via osteoclast mitochondria and cytoskeleton
Source: eLife. 2022 Jun 27;11:e73539. doi: 10.7554/eLife.73539 (PMC9352353; doi:10.7554/eLife.73539)
Supplement: Figure 3—figure supplement 2—source data 1. [file elife-73539-fig3-figsupp2-data1.xlsx]

## Sheet: Sheet1
	Raw Cq		∆Cq	2^-∆Cq			Raw Cq		∆Cq	2^-∆Cq
	mrps2	acp5	acp5	acp5			mrps2	Runx2	Runx2	Runx2
Con DF 1	31.2787	29.0657	-2.21302	4.63645		Con DF 1	25.7539	29.3612	3.60726	0.0820552
Con DF 2	31.3331	28.7844	-2.54867	5.85094		Con DF 2	25.7798	29.4325	3.65273	0.0795093
Con DF 3	31.5054	29.3619	-2.14347	4.41822		Con DF 3	25.7835	29.3768	3.5933	0.0828532
cko DF 1	28.8536	21.5239	-7.32965	160.859		cko DF 1	26.4141	29.5988	3.18477	0.109974
cko DF 2	29.1703	21.6676	-7.50273	181.362		cko DF 2	26.5126	29.5609	3.0483	0.120884
cko DF 3	29.1316	21.8502	-7.28141	155.569		cko DF 3	26.4391	29.4312	2.9921	0.125687
