# Supplementary material for: Transferrin receptor 1-mediated iron uptake regulates bone mass in mice via osteoclast mitochondria and cytoskeleton
Source: eLife. 2022 Jun 27;11:e73539. doi: 10.7554/eLife.73539 (PMC9352353; doi:10.7554/eLife.73539)
Supplement: Figure 3—figure supplement 3—source data 1. [file elife-73539-fig3-figsupp3-data1.xlsx]

## Sheet: Sheet1
male		BV/TV	Oc.S/BS	N.Oc/B.Pm		female		BV/TV	Oc.S/BS	N.Oc/B.Pm
	con						con
45	Ctrl	16.2848	15.8643	7.287		18	Ctrl	19.0682	31.2541	9.2059
47	Ctrl	18.8251	13.4986	5.3733		68	Ctrl	8.0027	20.0474	5.6906
49	Ctrl	12.0991	14.1517	6.1256		110	Ctrl	12.7307	17.5354	5.531
59	Ctrl	24.2407	14.5039	4.8736		113	Ctrl	17.1113	34.4639	10.5034
69	Ctrl	10.5091	20.5186	9.1168		83	Ctrl	5.128	24.6972	7.2515
98	Ctrl	14.6342	18.6204	7.0059
	cKO						cKO
2	cKO	47.7646	17.5521	7.1993		52	cKO	48.5906	20.8083	5.3502
42	cKO	41.4348	18.7787	7.8351		61	cKO	38.3009	18.1532	5.1143
48	cKO	32.8132	13.669	6.4902		66	cKO	54.5719	16.921	5.1647
60	cKO	44.2229	15.8436	7.0803		89	cKO	53.6385	22.8838	7.1256
90	cKO	27.2073	18.7577	7.1494		116	cKO	39.0953	17.0934	5.1053
92	cKO	33.4125	19.2948	8.2623		74	cKO	54.2709	24.5802	5.7496
93	cKO	45.0085	19.3436	8.4739
102	cKO	22.5027	15.5354	6.7862
104	cKO	24.454	21.2394	8.5416
107	cKO	30.624	14.2245	6.3085
