# Supplementary material for: Transferrin receptor 1-mediated iron uptake regulates bone mass in mice via osteoclast mitochondria and cytoskeleton
Source: eLife. 2022 Jun 27;11:e73539. doi: 10.7554/eLife.73539 (PMC9352353; doi:10.7554/eLife.73539)
Supplement: Figure 3—source data 1. [file elife-73539-fig3-data1.xlsx]

## Sheet: histomorphometry
female con	BV/TV	Tb.N	Tb.Th	Tb.Sp	Oc.S/BS	BS	Oc.S
TRF1 23	7.1599	2.3965	29.8765	387.401	16.0075	0.071599	0.0114612
TFR1 33	7.2805	2.0959	34.7364	442.377	8.3922	0.072805	0.00610994
TFR1 36	9.1409	3.3978	26.9024	267.405	14.9273	0.091409	0.0136449
TFR1 53	10.6003	3.0023	35.3074	297.773	30.4641	0.106003	0.0322929
TFR1 72	7.5669	2.8136	26.8939	328.522	19.8997	0.075669	0.0150579
TFR1 75	7.2394	2.5655	28.2179	361.564	27.5249	0.072394	0.0199264
TFR1 76	4.615	1.8352	25.1479	519.765	27.8183	0.04615	0.0128381
female cKO	BV/TV	Tb.N	Tb.Th	Tb.Sp	Oc.S/BS	BS	Oc.S
TRF1 18	15.5245	3.8626	40.1921	218.703	16.74	0.155245	0.025988
TRF1 24	29.2251	6.8374	42.7433	103.512	9.4967	0.292251	0.0277542
TRF1 31	14.9914	3.8857	38.581	218.773	14.2313	0.149914	0.0213347
TFR1 35	30.8237	7.23	42.6331	95.6795	3.7344	0.308237	0.0115108
TFR1 54	21.5408	4.6852	45.9766	167.463	29.8837	0.215408	0.0643719
TFR1 61	21.8218	5.7651	37.8517	135.606	24.9971	0.218218	0.0545482
TFR1 74	8.2661	2.7499	30.0596	333.592	24.709	0.082661	0.0204247
TFR1 77	27.7504	6.1727	44.9563	117.046	18.1364	0.277504	0.0503292

## Sheet: serum marker ELISA
	TRAP5b	CTx-I	P1NP
female con
6	4.914	37.386	35.202
23	5.375	26.198	26.003
33	8.93	24.715	23.068
36	9.206	33.803	25.657
53	3.915	32.452	77.246
72	1.443	28.331	23.292
75	2.427	34.09	12.492
76	1.519	25.141	16.499
female cKO
24	5.113	37.601	54.174
31	7.061	48.042	61.506
35	5.487	13.698	44.202
54	3.341	46.607	62.966
61	3.836	40.159	64.655
74	2.631	38.057	23.254
77	2.835	52.938	66.6

## Sheet: tetracycline labeling
		BFR	MAR	sL.Pm
	mouse #
	TFR1 23	0.0445161	2.385	0.8571
	TFR1 33	0.0560368	4.0979	1.245
f con	TFR1 53	0.0308025	2.5343	1.0632
	TFR1 72	0.0607561	3.1683	0.9961
	TFR1 75	0.0459509	7.5336	1.3144
	TFR1 18	0.13618	1.9663	2.6762
	TFR1 24	0.0513981	3.2882	2.4239
	TFR1 31	0.0815675	3.0373	1.4179
f cKO	TFR1 35	0.144784	5.0117	2.9911
	TFR1 54	0.0852154	3.0751	3.3393
	TFR1 61	0.0483198	1.7499	4.493
	TfR1 74	0.0554844	5.726	1.1237
