# Supplementary material for: Transferrin receptor 1-mediated iron uptake regulates bone mass in mice via osteoclast mitochondria and cytoskeleton
Source: eLife. 2022 Jun 27;11:e73539. doi: 10.7554/eLife.73539 (PMC9352353; doi:10.7554/eLife.73539)
Supplement: Figure 4—figure supplement 1—source data 1. [file elife-73539-fig4-figsupp1-data1.xlsx]

## Sheet: TRAP count
male
Well	CONTROL			CKO
	Total OC	Spread OC	% Spread	Total OC	Spread OC	% Spread
1	460	352	76.5217	380	7	1.84211
2	500	300	60	316	5	1.58228
3	348	256	73.5632	424	5	1.17925
4	340	244	71.7647	336	8	2.38095
5	500	332	66.4	412	5	1.21359
6	540	348	64.4444	440	5	1.13636

## Sheet: WB quant
male
	Tfr1/MT				NFATc1/MT				Ctsk/MT
	con	c/+	c/c		con	c/+	c/c		con	c/+	c/c
	0.532529	-0.00205084	-0.0492676		0.116062	0.0503535	0.0161542		-0.0369005	-0.0249879	-0.014479
BMM	0.628861	-0.0470989	-0.0757166		0.101414	0.0611347	-0.00666208		-0.0360655	-0.0341999	-0.0298319
	0.550084	0.00345668	-0.0650188		0.128201	0.0422341	-0.0106648		0.0118857	-0.0139659	-0.0082515
	0.808227	0.0296941	-0.0396334		1.47036	1.13416	0.690934		0.248916	0.158172	-0.00895467
pOC	0.926361	0.0618162	-0.0656737		1.34066	0.997635	0.642349		0.183991	0.109967	-0.0145724
	0.846487	0.0622072	-0.0775499		1.11294	0.825226	0.640053		0.294107	0.183212	-0.0133384
	1.3772	0.447817	-0.057605		1.92135	1.65045	1.105		1.53118	1.46476	0.762096
OC	1.44222	0.520157	-0.115224		1.69274	1.42933	0.918171		1.34539	1.08068	0.593271
	1.24811	0.423023	-0.0481645		1.48119	1.20955	0.883028		1.21176	0.963765	0.612439

## Sheet: podosome-belt quant
Gender	Cell Type	Day	Total Cell	RINGed	%
MALE	control-1	4	135	99	73.3333
	control-2	4	198	117	59.0909
	control-3	4	207	126	60.8696
	cko-1	4	126	45	35.7143
	cko-2	4	297	72	24.2424
	cko-3	4	171	45	26.3158

## Sheet: actin-ring quant
m con	total Ocs	a-Ocs	%
1	207	144	69.5652
2	171	108	63.1579
3	198	126	63.6364
m cKO
1	189	45	23.8095
2	180	54	30
3	243	63	25.9259

## Sheet: pits quant
total area		resorbed	%
1080000	m-con1	219352	20.3104
	m-con2	224289	20.7675
	m-con3	342790	31.7398
1080000	m-cKO1	75541	6.99454
	m-cKO2	70344	6.51333
	m-cKO3	60780	5.62778
