# Supplementary material for: Transferrin receptor 1-mediated iron uptake regulates bone mass in mice via osteoclast mitochondria and cytoskeleton
Source: eLife. 2022 Jun 27;11:e73539. doi: 10.7554/eLife.73539 (PMC9352353; doi:10.7554/eLife.73539)
Supplement: Figure 4—source data 1. [file elife-73539-fig4-data1.xlsx]

## Sheet: TRAP count
female
Well	CONTROL			CKO
	Total OC	Spread OC	% Spread	Total OC	Spread OC	% Spread
1	552	392	71.0145	338	61	18.0473
2	728	576	79.1209	548	106	19.3431
3	580	408	70.3448	656	116	17.6829
4	624	448	71.7949	668	105	15.7186
5	556	400	71.9424	604	93	15.3974
6	540	388	71.8519	372	25	6.72043

## Sheet: OC marker qPCR
raw								∆Cq						2^-∆Cq
	MRPS2	TRAP	CtsK	NFATc1	DC Stamp	TfR1		TRAP	CtsK	NFATc1	DC Stamp	TfR1			TRAP	CtsK	NFATc1	DC Stamp	TfR1
BMM1	29.0103	28.1007	27.5387	26.3388	38.3595	27.0613		-0.909557	-1.47158	-2.67152	9.34923	-1.94896		BMM1	1.87847	2.77326	6.37102	0.00153321	3.86096
BMM2	28.4678	27.7498	27.166	26.1083	37.4597	26.029		-0.717988	-1.30175	-2.35952	8.99196	-2.43874		BMM2	1.64489	2.46529	5.13199	0.00196404	5.42169
BMM3	28.86	28.0574	27.5109	26.3434	38.4766	26.4496		-0.802551	-1.34903	-2.51654	9.61658	-2.41037		BMM3	1.74418	2.54741	5.72206	0.00127386	5.3161
pOC1	26.4105	19.3195	18.9108	21.1159	26.4183	22.1821		-7.09103	-7.49977	-5.29467	0.00772788	-4.22838		pOC1	136.337	180.99	39.2513	0.994658	18.7443
pOC2	26.6322	19.7104	19.1667	21.2927	26.7372	22.6644		-6.92183	-7.4655	-5.33949	0.104995	-3.96778		pOC2	121.249	176.742	40.49	0.929808	15.6466
pOC3	26.3046	19.1824	18.8993	21.0745	26.3695	22.2553		-7.12216	-7.40523	-5.2301	0.0649234	-4.04922		pOC3	139.311	169.51	37.5333	0.955996	16.5552
OC1	25.8065	16.3909	17.0318	20.2762	24.2192	19.0299		-9.41562	-8.77473	-5.53029	-1.58736	-6.77662		OC1	682.944	437.984	46.2149	3.00498	109.639
OC2	26.0709	16.4571	16.9949	20.3362	24.3333	19.3596		-9.61382	-9.076	-5.73474	-1.73756	-6.71125		OC2	783.516	539.693	53.251	3.33471	104.782
OC3	25.7366	16.2792	16.8884	20.1335	24.2973	19.1884		-9.45744	-8.84824	-5.60311	-1.43933	-6.54821		OC3	703.031	460.876	48.6075	2.71195	93.5854
BMM1	29.0957	28.3447	28.8281	26.6547	38.904	36.445		-0.75106	-0.267605	-2.44106	9.80828	7.34925		BMM1	1.68303	1.20381	5.43042	0.00111536	0.00613276
BMM2	29.2398	28.4741	29.092	26.9215	38.6908	37.0613		-0.76572	-0.147777	-2.31825	9.45096	7.82149		BMM2	1.70022	1.10786	4.98727	0.00142882	0.00442077
BMM3	28.3171	27.442	28.3422	25.9962	38.2486	35.1557		-0.875147	0.0250321	-2.32095	9.93147	6.83853		BMM3	1.83419	0.982799	4.99661	0.00102407	0.00873771
pOC1	26.3831	18.9007	18.6441	21.1441	26.2406	29.5664		-7.4824	-7.73906	-5.23901	-0.142528	3.18321		pOC1	178.825	213.644	37.7657	1.10384	0.110092
pOC2	26.2396	18.8011	18.449	20.975	26.147	29.6838		-7.4385	-7.79058	-5.26463	-0.0926441	3.44417		pOC2	173.465	221.411	38.4424	1.06632	0.0918762
pOC3	26.1459	18.7168	18.4723	21.0236	26.1471	29.3966		-7.42909	-7.67359	-5.12237	0.00116974	3.2507		pOC3	172.337	204.165	34.8326	0.99919	0.105061
OC1	26.8621	17.178	17.3699	21.3355	25.1991	27.1327		-9.68407	-9.49216	-5.52656	-1.66297	0.270619		OC1	822.611	720.156	46.0958	3.16667	0.828964
OC2	26.7706	17.1926	17.2397	21.3988	25.2858	27.3395		-9.57798	-9.53091	-5.3718	-1.48473	0.568967		OC2	764.294	739.76	41.4068	2.79865	0.674099
OC3	27.0081	17.507	17.5048	21.5762	25.5373	27.6011		-9.50113	-9.50331	-5.43194	-1.47084	0.59294		OC3	724.642	725.738	43.1695	2.77184	0.662991

## Sheet: WB quant
female
	Tfr1/MT				NFATc1/MT				Ctsk/MT
	con	c/+	c/c		con	c/+	c/c		con	c/+	c/c
	0.415715	-0.0581956	-0.00999678		0.00134284	0.0190803	0.0471622		-0.0323913	-0.0142124	-0.00665914
BMM	0.467832	-0.0550777	-0.0368518	BMM	-0.0697843	-0.0718067	0.0323615	BMM	-0.037687	-0.0156789	-0.0175292
	0.434467	-0.0191846	-0.0290861		0.192117	0.162531	0.180258		-0.0121886	0.01088	0.012591
	0.362207	0.0403768	-0.0453406		1.39861	1.33283	1.17605		0.0899903	0.257509	0.0223831
pOC	0.47005	0.0215822	-0.0148663	pOC	1.26062	1.24183	1.03562	pOC	0.052866	0.18367	0.0016305
	0.439323	0.038863	-0.0149323		1.00967	1.09534	1.06015		0.143292	0.368779	0.0546579
	1.12982	0.242768	-0.00508971		1.88723	1.68741	1.55937		1.11222	1.34454	0.703821
OC	1.1327	0.23089	-0.0113011	OC	1.60031	1.45318	1.1505	OC	0.936992	1.05103	0.600334
	0.868256	0.295115	-0.00623632		1.47441	1.42181	1.23478		0.917087	1.13752	0.717661

## Sheet: nuclei no quant
			nuclei #
			3 to 10		10 to 30		>30	total OC
		f-con1	45		81		32	158
		f-con2	54		72		22	148
		f-con3	81		45		18	144
		f-con4	66		110		36	212
		f-cKO1	112		55		9	176
		f-cKO2	105		43		13	161
		f-cKO3	121		81		4	206
		f-cKO4	71		90		7	168

## Sheet: podosome-belt quant
Gender	Cell Type	Day	Total Cell	RINGed	%
FEMALE	control-1	4	171	90	52.6316
	control-2	4	189	135	71.4286
	control-3	4	189	126	66.6667
	cko-1	4	225	36	16
	cko-2	4	288	45	15.625
	cko-3	4	333	72	21.6216

## Sheet: actin-ring quant
f con	total Ocs	a-Ocs	%
1	308	216	70.1299
2	162	101	62.3457
3	278	205	73.741
f cKO
1	245	67	27.3469
2	316	103	32.5949
3	184	52	28.2609

## Sheet: pits quant
total area		resorbed	%
1080000	f-con1	195949	18.1434
	f-con2	317532	29.4011
	f-con3	225936	20.92
1080000	f-cKO1	49650	4.59722
	f-cKO2	33994	3.14759
	f-cKO3	55726	5.15981
