# Supplementary material for: Transferrin receptor 1-mediated iron uptake regulates bone mass in mice via osteoclast mitochondria and cytoskeleton
Source: eLife. 2022 Jun 27;11:e73539. doi: 10.7554/eLife.73539 (PMC9352353; doi:10.7554/eLife.73539)
Supplement: Figure 5—source data 1. [file elife-73539-fig5-data1.xlsx]

## Sheet: hemin-TRAP
Cell Type	Treatment	[conc]	Total Cell	RINGed	%
control-1	vehicle	0	924	620	67.0996
control-2	vehicle	0	904	572	63.2743
control-3	vehicle	0	588	372	63.2653
control-4	vehicle	0	708	452	63.8418
control-5	vehicle	0	784	508	64.7959
control-6	vehicle	0	844	528	62.5592
control-1	hemin	1	820	480	58.5366
control-2	hemin	1	844	524	62.0853
control-3	hemin	1	960	624	65
control-4	hemin	1	700	440	62.8571
control-5	hemin	1	1092	728	66.6667
control-6	hemin	1	668	304	45.509
control-1	hemin	3	748	444	59.3583
control-2	hemin	3	1292	824	63.7771
control-3	hemin	3	552	384	69.5652
control-4	hemin	3	780	492	63.0769
control-5	hemin	3	820	496	60.4878
control-6	hemin	3	788	468	59.3909
control-1	hemin	10	1092	740	67.7656
control-2	hemin	10	824	544	66.0194
control-3	hemin	10	1104	756	68.4783
control-4	hemin	10	772	496	64.2487
control-5	hemin	10	1268	868	68.4543
control-6	hemin	10	1056	712	67.4242
cko-1	vehicle	0	580	16	2.75862
cko-2	vehicle	0	588	28	4.7619
cko-3	vehicle	0	648	44	6.79012
cko-4	vehicle	0	592	48	8.10811
cko-5	vehicle	0	724	32	4.41989
cko-6	vehicle	0	620	56	9.03226
cko-1	hemin	1	496	28	5.64516
cko-2	hemin	1	404	44	10.8911
cko-3	hemin	1	740	72	9.72973
cko-4	hemin	1	724	64	8.83978
cko-5	hemin	1	480	76	15.8333
cko-6	hemin	1	476	48	10.084
cko-1	hemin	3	532	140	26.3158
cko-2	hemin	3	772	136	17.6166
cko-3	hemin	3	656	120	18.2927
cko-4	hemin	3	624	96	15.3846
cko-5	hemin	3	536	96	17.9104
cko-6	hemin	3	520	104	20
cko-1	hemin	10	556	300	53.9568
cko-2	hemin	10	832	504	60.5769
cko-3	hemin	10	828	480	57.971
cko-4	hemin	10	728	340	46.7033
cko-5	hemin	10	860	496	57.6744
cko-6	hemin	10	568	300	52.8169

## Sheet: FAC TRAP
Cell Type	Treatment	[conc]	Total Cell	RINGed	%
control-1	vehicle	0	972	548	56.3786
control-2	vehicle	0	916	556	60.6987
control-3	vehicle	0	872	512	58.7156
control-4	vehicle	0	652	420	64.4172
control-5	vehicle	0	840	564	67.1429
control-6	vehicle	0	796	492	61.809
control-1	FAC	1	652	380	58.2822
control-2	FAC	1	980	600	61.2245
control-3	FAC	1	868	520	59.9078
control-4	FAC	1	916	572	62.4454
control-5	FAC	1	796	468	58.794
control-6	FAC	1	728	404	55.4945
control-1	FAC	3	1064	672	63.1579
control-2	FAC	3	1004	640	63.745
control-3	FAC	3	1052	712	67.6806
control-4	FAC	3	920	560	60.8696
control-5	FAC	3	1144	708	61.8881
control-6	FAC	3	972	484	49.7942
control-1	FAC	10	696	464	66.6667
control-2	FAC	10	1084	664	61.2546
control-3	FAC	10	1052	688	65.3992
control-4	FAC	10	924	584	63.2035
control-5	FAC	10	660	444	67.2727
control-6	FAC	10	956	524	54.8117
cko-1	FAC	0	648	24	3.7037
cko-2	FAC	0	428	24	5.60748
cko-3	FAC	0	812	60	7.38916
cko-4	FAC	0	696	40	5.74713
cko-5	FAC	0	628	56	8.9172
cko-6	FAC	0	592	32	5.40541
cko-1	FAC	1	428	16	3.73832
cko-2	FAC	1	520	16	3.07692
cko-3	FAC	1	628	24	3.82166
cko-4	FAC	1	516	20	3.87597
cko-5	FAC	1	624	24	3.84615
cko-6	FAC	1	540	24	4.44444
cko-1	FAC	3	508	12	2.3622
cko-2	FAC	3	580	12	2.06897
cko-3	FAC	3	668	24	3.59281
cko-4	FAC	3	676	32	4.73373
cko-5	FAC	3	772	32	4.14508
cko-6	FAC	3	496	20	4.03226
cko-1	FAC	10	628	20	3.18471
cko-2	FAC	10	836	28	3.34928
cko-3	FAC	10	616	28	4.54545
cko-4	FAC	10	632	56	8.86076
cko-5	FAC	10	484	36	7.43802
cko-6	FAC	10	672	40	5.95238

## Sheet: hemin-podosome-belt
Cell Type	Treatment	Total Cell	RINGed	%
control-1	vehicile	495	270	54.5455
control-2	vehicile	486	279	57.4074
control-3	vehicile	450	288	64
control-4	vehicile	432	225	52.0833
control-1	hemin	774	702	90.6977
control-2	hemin	666	585	87.8378
control-3	hemin	675	612	90.6667
control-4	hemin	603	486	80.597
cko-1	vehicile	612	117	19.1176
cko-2	vehicile	468	54	11.5385
cko-3	vehicile	540	54	10
cko-4	vehicile	459	81	17.6471
cko-1	hemin	639	378	59.1549
cko-2	hemin	693	450	64.9351
cko-3	hemin	621	423	68.1159
cko-4	hemin	576	369	64.0625

## Sheet: hemin-actin-ring
con-veh	#	a-#	%	con-hem	#	a-#	%	cKO-veh	#	a-#	%	cKO-hem	#	a-#	%
1	238	154	64.7059	1	364	238	65.3846	1	280	84	30	1	378	238	62.963
2	294	140	47.619	2	308	216	70.1299	2	336	70	20.8333	2	406	210	51.7241
3	364	196	53.8462	3	504	388	76.9841	3	322	84	26.087	3	308	154	50
4	266	168	63.1579	4	420	332	79.0476	4	266	56	21.0526	4	336	168	50

## Sheet: hemin-pits
con-veh	con-hemin	cKO-veh	cKO-hemin
14.9884	25.7555	9.19705	26.3883
22.9774	28.9421	7.89527	23.5207
14.0257	29.6056	4.17995	39.7579
25.6558	25.8037	9.52907	25.013
