# Supplementary material for: Transferrin receptor 1-mediated iron uptake regulates bone mass in mice via osteoclast mitochondria and cytoskeleton
Source: eLife. 2022 Jun 27;11:e73539. doi: 10.7554/eLife.73539 (PMC9352353; doi:10.7554/eLife.73539)
Supplement: Figure 6—figure supplement 1—source data 1. [file elife-73539-fig6-figsupp1-data1.xlsx]

## Sheet: Cox-I
	con				cKO
	BMM	BMM+hemin	OC	OC+hemin	BMM	BMM+hemin	OC	OC+hemin
	0.100617	0.0968171	0.0894401	0.21703	0.130271	0.114919	0.186413	0.363728
	0.0872638	0.110418	0.0826008	0.285051	0.122597	0.0929565	0.200975	0.456414
	0.0847523	0.0998472	0.0778148	0.289135	0.0926829	0.0862026	0.186409	0.399217

## Sheet: Cox-II
	con				cKO
	BMM	BMM+hemin	OC	OC+hemin	BMM	BMM+hemin	OC	OC+hemin
	0.306571	0.450007	0.678392	1.09306	0.145326	0.188185	0.436631	1.21085
	0.486224	0.609407	0.78019	1.20436	0.242133	0.304362	0.613229	1.34518
	0.412344	0.529141	0.670401	1.07535	0.230048	0.305305	0.539768	1.15851

## Sheet: Cox-III
	con				cKO
	BMM	BMM+hemin	OC	OC+hemin	BMM	BMM+hemin	OC	OC+hemin
	0.397392	0.466445	1.1045	1.06255	0.157166	0.159785	0.858274	1.10396
	0.528512	0.577005	1.1076	1.15973	0.265461	0.263715	0.891634	1.24177
	0.427657	0.462162	0.866125	0.94861	0.23216	0.24837	0.73965	1.00339

## Sheet: Cox-IV
	con				cKO
	BMM	BMM+hemin	OC	OC+hemin	BMM	BMM+hemin	OC	OC+hemin
	0.0597426	0.00933654	0.268721	0.06313	0.0231389	0.0298475	0.332518	0.85339
	0.0795181	0.0395804	0.48892	0.0943183	0.096334	0.0550604	0.596583	1.21379
	0.0740577	0.0568176	0.508674	0.151529	0.155103	0.101425	0.592259	1.16341

## Sheet: Cox-V
	con				cKO
	BMM	BMM+hemin	OC	OC+hemin	BMM	BMM+hemin	OC	OC+hemin
	0.863553	1.04445	1.70407	1.54024	0.65793	0.826731	1.42722	1.47322
	1.0154	1.1251	1.36211	1.35001	0.773908	0.934612	1.2505	1.35779
	0.807718	0.881105	0.964017	0.982026	0.67996	0.770996	0.918928	1.07316
