# Supplementary material for: Transferrin receptor 1-mediated iron uptake regulates bone mass in mice via osteoclast mitochondria and cytoskeleton
Source: eLife. 2022 Jun 27;11:e73539. doi: 10.7554/eLife.73539 (PMC9352353; doi:10.7554/eLife.73539)
Supplement: Figure 7—source data 1. [file elife-73539-fig7-data1.xlsx]

## Sheet: Sheet1
	BMM MITOTRACKER			pOC MITOTRACKER			OC MITOTRACKER				BMM MITOSOX			pOC MITOSOX			OC MITOSOX				JC-1 BMM			JC-1 pOC			JC-1 OC
	CON	KO		CON	KO		CON	KO			CON	KO		CON	KO		CON	KO			CON	KO		CON	KO		CON	KO
	5.304	6.564		7.306	8.857		13.938	8.361			3.646	4.549		16.574	8.6		12.328	13.39			0.798551	0.650614		1.25758	1.06948		1.14672	0.589643
	5.457	4.472		9.026	9.483		12.163	10.805			7.7	6.169		15.992	9.273		16.909	8.139			0.993288	0.508341		2.17644	1.20812		1.14961	0.713452
	6.108	2.929		9.317	7.567		11.016	8.463			5.095	4.09		10.626	5.13		9.002	5.872			2.19757	0.601716		1.28272	1.1053		1.34698	1.13578
	6.178	5.833		6.812	8.871		20.297	10.918			6.741	3.82		12.415	4.725		17.13	6.507			1.12007	0.677396		1.67135	0.927518		1.14672	0.987473
	4.645	4.261		6.56	8.294		16.028	6.66			3.173	4.966		11.439	6.851		13.816	8.07			0.954532	0.579107		2.02306	1.28415		1.28803	1.05133
	7.001	10.755		10.25	13.731		17.021	18.9992			6.7	5.509		9.496	5.364		10.483	10.217			0.60665	0.585974		1.93978	1.02367		1.22571	0.940858
	5.167	6.313		8.606	7.716		13.954	9.454			7.177	5.425		9.89	6.847		27.77	10.217			0.582603	0.640663		1.30308	1.13159		0.40626	0.914299
	5.62	4.954		14.641	12.93		15.662	5.428			5.504	6.091		10.251	7.169		11.26	8.749			0.691439	0.983183		1.48177	1.70883		1.37838	0.336049
	5.021	6.016		8.434	11.385		11.689	7.901			4.45	6.733		8.222	7.672		27	6.77			0.868726	0.740674		1.07844	1.08065		1.36795	0.882703
	4.6	5.925		7.459	10.098		12.328	7.505			3.621	3.467		7.863	10.967		20.697	8.639			0.629067	0.575549		1.8551	1.05637		1.40499	1.27817
	7.126	7.128		8.726	7.143		16.909	3			4.66	1		13.731	5.301		20.382	9.088			0.612151	1.61757		3.10566	1.43485		1.2916	1.22042
	4.965	9.038		11.508	8.243		9.002	7.934			13.9938	6.639		7.716	6.812		13.32	13.826			1.36256	0.630361		1.01181	1.13719		1.18423	0.906809
	6.792	5.701		8.029	8.252		17.13	9.154			8.034	7.207		12.93	6.502		16.051	6.67			1.43041	0.798941		1.24181	1.12743		1.28803	0.670619
	6.07	6.815		10.138	6.879		13.816	11.607			8.052	3.278		11.385	7.414		5	6.676			0.658845	1.56248		0.916216	1.20231		3.663	0.936706
	5.56	4.242		13.248	6.13		10.483	10.517			3.54	8.261		10.098	6.499		18.431	9.985			0.638494	0.703832		1.85225	1.06066		2.7849	1.08981
	6.212	10.382		10.219	9.209		6.88282	5.561			5.111	3.914		7.143	6.506		12.274	7.805			2.1029	0.613793		1.23944	1.15652		2.76639	0.736147
	7.016	7.921		7.799	5.537		11.26	7.383			8.04	4.895		8.243	5.086		10.55	7.109			2.6772	0.501999		1.84043	1.06769		2.36928	0.912679
	5.631	4.66		6.13	11.639		16.115	7.745			5.449	7.596		8.252	8.22		9.537	5			0.854329	1.11907		1.98144	1.11848		2.63784	1.1166
	7.243	4.248		6.883	6.824		13.012	5.572			5.776	4.773		6.879	11.484		14.152	6.225			1.47408	0.745635		1.24059	1.13626		2.44018	1.01005
	4.735	5.739		6.055	6.588		3.87294	6.531			5.191	5.773		6.13	7.989		22.643	6.723			1.12001	0.834003		1.86393	1.13649		2.368	1.10557
	4.549	7.077		12.88	5.217		20.697	6.139			4.729	6.885		9.209	6.436		9.552	4.94			0.999026	0.827109		1.21266	1.1881		2.20777	0.878273
	6.169	4.339		12.153	12.638		20.382	8.728			4.94	6.664		5.537	7.055		23.214	6.774			1.0901	0.597537		1.1918	1.13279		2.18283	1.24659
	4.09	6.575		7.441	7.821		13.32	7.018			7.326	8.366		11.639	6.758		17.851	8.463			1.21464	1.17409		1.83994	1.51862		1.784	1.05313
	8.015	3.354		8.954	5.302		16.051	5.07			8.314	8.73		6.824	7.387		15.504	10.918			1.42166	0.47203		1.80071	1.39104		0.805617	0.921537
	4.966	6.549		10.676	12.792		14.81	6.984			7.27	7.319		6.588	7.227		16.028	6.66			1.71106	1.08975		1.5685	2.01754		1.30338	0.920303
	5.509	4.893		7.605	6.054		12	8.856			3.257	7.122		5.217	7.23		17.021	8.961			0.656011	0.488664		1.10912	1.11954		1.38009	0.708345
	5.425	4.91		6.571	5.621		12.274	6.347			13.992	3.943		12.638	6.667		13.954	9.454			0.75999	0.521205		1.23461	1.29338		1.20506	1.06518
	6.091	3.243		7.562	6.314		25.998	6.442			7.149	3.5647		7.821	12.197		15.662	5.428			1.60377	1.54712		1.32508	1.00233		1.2267	2.9874
	6.733	7.79		7.587	5.862		16.624	8.841			5.085	3.992		5.302	9.533		11.689	7.901			0.995105	0.490006		1.85071	0.965415		1.34968	0.885667
	3.467	9.093		7.66	7.948		6.9762	6.744			7.069	8.267		12.792	12.689		10	7.505			1.51271	1.4722		1.44673	1.21092		1.09465	0.889756
	3.186	6.02		7.88	7.346		19.282	9.581			5.997	3.709		6.054	7.644		13.9	17.316			1.67011	0.580126		1.10478	0.797152		1.38768	1.21364
	6.639	4.514		6.232	7.152		2.87746	8.385			12.9992	8.019		5.621	7.968		9.1	7.934			0.818903	0.631601		1.15897	0.906507		1.21852	1.18025
	7.207	3.646		8.481	6.847		10	15.097			6.246	5.702		6.314	8.726		16	9.154			1.27533	0.771655		1.29965	0.965882		1.61314	0.941382
	3.278	7.7		7.021	5.609		22.398	16.549			6.475	6.276		5.862	11.508		17.4	11.607			0.860201	0.558614		1.64325	1.01488		0.753629	1.15226
	8.261	5.095		14.689	12.283		17.202	9.968			12.9872	4.717		7.948	8.029		12.6	10.517			0.687412	0.919301		1.18227	1.21574		1.41399	1.46047
	3.914	6.741		17.164	8.556		21.444	8.179			5.893	2.08		7.346	10.138		7	5.561			0.715075	1.86947		1.63171	1.56863		1.61314	1.08932
	4.895	3.173		8.495	7.812		16.898	6.553			4.81	4.82		7.152	13.248		11.26	7.383			0.769032	0.941619		0.973942	1.01087		1.14961	1.34611
	7.596	6.7		16.199	7.281		8.241	5.823			6.939	7.004		6.847	10.219		16.115	7.745			0.801131	0.893443		1.24261	1.26956		1.15518	1.21852
	4.773	7.177		8.259	9.331		11	5.513			7.325	7.501		5.609	7.799		13.012	5.572			0.726808	0.815679		0.96902	0.944612		1.1907	0.442
	5.773	5.504		6.191	8.531		12.422	4.979			6.549	6.571		12.283	6.13		21.039	6.531			0.788662	0.679134		1.36534	1.1784		1.2267	1.18423
	6.885	4.45		8.025	4.87273		10.55	5.505			8.281	7.523		8.556	6.883		20.697	6.139			0.2	0.565781		0.641426	0.990776		1.20935	2.883
	6.664	3.621		6.706	7.622		9.537	4.831			11	6.941		7.812	6.055		20.382	8.728			0.688829	0.70692		1.51125	1		1.23174	2.83896
	8.366	4.66		11.327	6.91		14.152	6.349			6.147	7.088		7.281	12.88		13.32	7.018			2.1717	1.17277		1.69391	1.29609		1.17376	1.20935
	8.73	3.264		20.355	10.5		22.643	10.108			4.373	6.316		9.331	12.153		16.051	5.07			0.607402	1.65306		1	1.45343		1.02446	1
	7.319	8.034		9.415	11.214		9.552	7.465			4.679	5.809		8.531	7.441		14.81	6.984			1.13258	1.46091		1.36748	2.21698		1.25358	1.7739
	7.122	8.052		8.19	4.89729		23.214	8.047			3.357	5.877		11.588	8.954		17.9	8.856			0.581777	1.31961		1.31808	1.60448		1.26298	3.7762
	3.943	3.54		9.949	10.154		17.851	13.39			4.056	3.715		7.622	10.676		11.9	6.347			2.87558	0.682253		1.32778	1.18981		1.12398	0.3
	8.357	5.111		8.079	9.82		15.504	8.139			5.477	8.982		6.91	7.605		25.998	6.442			0.545711	1.27151		0.996589	1.237		1	1.25358
	10.233	8.04		9.615	10.546		11.135	5.872			4.439	7.317		8.431	6.571		16.624	8.841			2.12855	1.41347		0.984979	0.956443		2.36928	0.2783
	8.267	5.449		9.141	10.171		12.535	6.507			3.685	6.142		9.679	7.562		19.033	6.744			0.790096	0.546208		1.10733	1.21227		2.63784	1.40887
	3.709	15.88		12.508	11.208		9.284	8.07			4.307	8.463		10.516	7.587		19.282	9.581			0.775605	0.972837		1.45068	1.74081		2.44018	1.02446
	8.019	5.191		9.766	12.117		11.874	10.217			3.921	3.469		11.049	7.66		10.539	8.385			0.641578	0.996805		0.992312	1.45514		2.368	0.976985
	5.702	4.729		8.179	8.595		2.7621	8.749			4.638	4.111		8.459	7.88		10	15.097			0.552967	0.629755		2.38826	0.858194		2.20777	1.15733
	6.276	4.94		8.047	10.825		10.244	6.77			4.218	7.791		8.06	6.232		22.398	16.549			0.71886	1.07635		0.82111	1.60487		2.18283	1.1
	4.717	7.326		6.48	8.054		13.434	8.639			4.533	3.992		5.271	9.671		17.202	9.968			0.678	0.750279		1.61825	1.8958		1.784	1.38768
	10.019	8.314		7.346	12.139		20.132	9.088			6.26	2.456		9.883	5.9		21.444	8.179			0.821396	0.924195		2.70037	0.662889		1.30338	1.41399
	10.142	5.925		6.8	8.431		12.714	13.826			5.361	3.90972		7.643	7.709		16.898	6.553			0.698101	1.21068		1.0049	1.2428		1.38009	1.35801
	7.004	3.516		7.441	9.679		14.625	6.67			7.434	7.376		7.394	14.689		8.241	5.823			0.652721	1.68529		1.20909	1.30889		1.20506	1.13272
	7.501	3.989		7.835	10.516		17.083	6.676			3.949	6.403		5.843	17.164		11	5.513			0.568242	1.52018		1.05277	0.885667		1.2267	1.83106
	6.571	5.269		7.823	11.049		8.8738	9.985			6.018	8.448		5.912	8.495		12.422	4.979			0.558745	1.13998		1.27397	0.889756		1.34968	1.26686
	4.387	8.268		11.236	8.459		13.961	7.805			6.544	6.938		6.506	16.199		10.55	5.505			0.686525	0.917304		1.59163	1.21364		1.09465	1.81145
	3.499	7.353		13.451	8.06		11.342	7.109			7.267	5.529		5.342	8.259		9.537	4.831			0.595076	1.01241		2.36928	1.18025		1.21669	1.75767
	3.562	7.323		11.354	5.271		11.65	5			6.909	8.753		11.035	6.191		14.152	6.349			0.590128	1.44297		0.2	0.941382		1.18537	1.18365
	3.419	6.939		10.419	9.883		11.167	6.225			10.113	3.9283		9.893	8.025		22.643	10.108			1.69633	1.54065		1.13118	1.15226		0.923329	1.11893
	14.101	7.325		5.791	7.643		14.016	6.723			6.173	7.109		5.907	6.706		9.552	7.465			0.6659	2.13464		1.49946	1.46047		1	1.09485
	7.938	6.549		3.90981	7.394		17.38	4.94			7.428	4.486		10.414	11.327		23.214	8.047			1.0957	1.06542		1.35801	1.08932		1.08738	0.968077
	6.908	8.281		9.765	5.843		14.689	6.774			14.777	4.593		7.558	2		17.851	13.39			0.788427	1.48506		1.13272	1.34611		1.15733	0.973017
	8.437	4.663		11.931	5.912		11.466	7.391			16.4328	2		8.647	9.415		15.504	8.139			1.40644	0.865159		1.83106	1.21852		1.09485	1.7729
	9.237	6.147		12.05	6.506		15.381	11.253			10.857	9.99		8.268	8.19		11.135	5.872			0.606088	0.713693		1.26686	1.84302		1.34611	0.974503
	10.198	3.301		6.413	5.342		8.649	11.796			8.464	9.701		7.301	9.949		12.535	6.507			0.515912	2.60738		1.81145	1.18423		1.18537	1.18537
	8.008	8.829		8.656	15.993		21.123	9.469			7.821	8.249		7.559	8.079		9.284	8.07			0.458124	2.10955		1.75767	0.996346		1.84302	1.24163
	7.449	6.156		6.931	9.893		13.695	9.135			8.756	2.6862		10.787	9.615		11.874	10.217			0.848775	0.637071		1.18365	2.83896		1.8729	1.28803
	5.991	8.059		7.779	5.907		16.333	2			4.366	3.626		9.447	9.141		15.518	8.749			0.883702	0.402347		1.11893	1.20935		1.88115	2.99583
	5.729	5.104		10.222	10.414		15.307	7.063			4.452	3		11.222	12.508		10.244	6.77			0.796501	0.6366		1.09485	2.44018		1.89494	1.14961
	8.594	5.744		9.22	7.558		14.378	21.8837			4.709	6.334		8.572	9.766		13.434	8.639			0.57295	0.697742		0.968077	1		1.97481	1.14672
	7.366	5.388		11.609	8.647		5	9.296			6.939	6.034		8.994	8.179		20.132	9.088			1.12682	0.673514		0.973017	1		1.9983	1.2267
	8.398	6.436		7.564	8.268		13.684	6.752			7.66	9.015		11.062	8.047		12.714	13.826			0.586805	0.623227		1.17376	0.3		1.9999	1.23548
	10.279	5.1		8.946	7.301		13.744	7.789			6.78	3.749		10.426	6.48		14.625	6.67			0.807529	0.72303		0.974503	1.25358		2.76644	0.863467
	9.335	5.642		7.313	7.559		19.836	10.456			5.946	4.247		7.427	7.346		17.083	6.676			0.848547	0.735389		1.18537	2.368		1.56239	1.12398
	7.76	5.1		6.808	10.787		17.768	10.559				3.2		7.36	6.8		20.055	9.985			0.672047	0.611059		1.24163	1.40887		2.78959	0.923329
	4.147	4.216		7.391	9.447		13.746	12.335						6.255	7.441		13.961	7.805			0.536522	0.81258		1.28803	1.02446		1.838	0.878375
	4.727	5.437		8.899	11.222		11.74	18.8739						6.998	7.835		11.342	7.109			0.613677	1.0855		1.61314	0.976985		2.86739	1.11589
	8.888	6.745		9.058	8.572		13.768	17.872						5.982	7.823		11.65	5			0.590049	1.18405		1.14961	1.15733		3.3338	1.08383
	7.23	5.102		11.144	8.994		10.626	18.7665						9.206	11.236		11.167	6.225			0.3	0.744193		1.14672	2.04008		2.8849	0.828699
	10.843	5.898		9.527	11.062		6.079	10.196						7.546	13.451		14.016	6.723			1.57564	0.504468		1.2267	1.38768		2.88494	1
	10.475	4.874		2	10.426		8.881	14.119						6.841	11.354		17.38	4.94			1.26818	0.754333		1.23548	1.41399		1.98485
	7.213	3.788		10.618	7.427		16.471	23.772						8.41	10.419		14.689	6.774			0.613559	0.873791		0.863467	1.20506		3.446
	8.818	4.461		5.854	7.36		7.802	19.6638						7.994	5.791		11.466	7.391			0.590998	0.2		1.12398	2.20777		2.98874
	13.803	3.659		5.899	2.9934		11.037	16.8883						8.962	14.797		15.381	11.253			0.815263	0.813003		0.923329	0.807165		3
	5.628	8.177		17.161	6.998		9.615	6.957						12.106	9.765		8.649	11.796			0.542715	0.703767		0.878375	1.21669		3
	8.599	7.137		4.882	5.982		9.061	14.309						7.753	11.931		21.123	9.469			0.647641	0.917257		1.11589	1.45848		3.663
	5.642	7.083		15.283	9.206		11.704	14.474						7.714	12.05		13.695	9.135			0.888889	0.99123		1.08383	1.1907		2.7849
	5.346	3.949		11.174	7.546		10.698	12.14						6.008	10.222		16.333	12.094			0.757571	0.726817		0.828699	0.796454		2.76639
	8.982	6.018		10.231	6.841		5.533	18.5543						8.879	9.22		15.307	7.063			0.7146	1.32926		1	1.01962		1.40887
	7.317	6.544		11.494	8.41		18.356	10.151						6.495	11.609		14.378	9.163			0.623263	0.822027		0.904661	1.09727		0.983149
	6.142	7.267		16.387	7.994		18.061	15.674						10.597	7.564		12.526	9.296			0.458263	0.959414		1.02473	0.851432		0.659994
	8.463	6.909		9.539	8.962		7.478	8.328						11.608	8.946		13.684	6.079			0.430651	1.31374		0.913293	1.84204		1.24163
	3.469	10.113		10.638	12.106		9.911	8.529						6.157	7.313		13.744	8.881			0.477473	1.85281		1.88778	1.18643		1.56383
	7.499	6.173		6.264	7.753		2	13.642						6.235	6.808		19.836	16.471			0.778599	1.37017		1.06316	1.03287		1.23548
	7.791	7.428		12.185	7.714		9.72	12.58						9.302	7.391		17.768	7.802			0.55891	1.14227		1.08419	2.0127		1.44456
	11.35	5.69		10.599	7.648			12.015						8.605	8.899		13.746	11.037			0.883691	0.3		0.91572	2.59788		1.45848
	9.046	4.769		9.849	5.586			15.7729						7.157	9.058		11.74	9.615			0.985689	1.11912		0.90779	1.0739		1.24163
		14.82		7.128	6.619			11.937						8.568	11.144		13.768	9.061			0.977159	2.14029		1.3051	1.15429		1.17376
				15.163	4.834			7.298									10.626	11.704				1.6089		0.888873	1.10931		0.981611
				8.485	6.008			11.916														1.39151		0.840819	0.820926		1.23548
				7.301	8.879			9.961																1.09414	0.795019		3.2
				16.358	6.495			8.223																0.893625	0.681982		3.97655
				11.466	10.597			13.072																0.912327			3.97655
				10.322	21.9873			6.773																0.903258			4.8
				11.001	6.157			11.196																			4.8829
				9.522	6.235			7.985
					9.302			9.542
					8.605			8.57
					7.157			7.628
					8.568			8.682
								9.931
								8
								10.395
								9.493
								12.745
								11.955
								12.069
								14.937
								7.319
								12.082
								8.832
								10.664
								10.489
