# Supplementary material for: Transferrin receptor 1-mediated iron uptake regulates bone mass in mice via osteoclast mitochondria and cytoskeleton
Source: eLife. 2022 Jun 27;11:e73539. doi: 10.7554/eLife.73539 (PMC9352353; doi:10.7554/eLife.73539)
Supplement: Figure 8—source data 1. [file elife-73539-fig8-data1.xlsx]

## Sheet: Sheet1
	BASAL RESPIRATION							ATP LINKED RESPIRATION							MAX RESPIRATION							% RESERVE RESPIRATION							PROTON LEAK							COUPLING EFFICIENCY							NON-MITO RESPIRATION
	BMM CON	BMM KO	pOC CON	pOC KO	OC CON	OC KO		BMM CON	BMM KO	pOC CON	pOC KO	OC CON	OC KO		BMM CON	BMM KO	pOC CON	pOC KO	OC CON	OC KO		BMM CON	BMM KO	pOC CON	pOC KO	OC CON	OC KO		BMM CON	BMM KO	pOC CON	pOC KO	OC CON	OC KO		BMM CON	BMM KO	pOC CON	pOC KO	OC CON	OC KO		BMM CON	BMM KO	pOC CON	pOC KO	OC CON	OC KO
	2	6	5	8	87	38		1	3	2	5	58	24		5	8	9	12	336	70		72	49	62	52	386	184		1	3	3	3	29	15		50	50	40	62.5	66.6667	63.1579		0.905632	0.962486	1.19033	2.31009	39	15
	3	5	6	9	66	35		2	3	4	5	43	22		6	7	9	11	296	61		57	45	51	44	447	173		1	2	2	3	23	13		66.6667	60	66.6667	55.5556	65.1515	62.8571		0.909792	1.41314	0.694499	1.84476	36	15
	4	5	6	8	66	36		3	3	3	4	42	23		7	7	10	11	267	65		60	49	55	46	406	180		2	2	3	4	24	13		75	60	50	50	63.6364	63.8889		0.81206	1.6496	1.33844	1.87227	34	15
	3	5	6	5	69	31		2	3	4	2	45	18		5	8	10	11	285	43		61	51	57	78	412	139		2	2	2	3	24	13		66.6667	60	66.6667	40	65.2174	58.0645		1.15828	1.41515	1.9905	1.14677	32	8
	3	5	5	5	87	29		2	3	3	2	54	20		5	8	9	7	395	51		58	56	60	49	452	175		2	2	2	3	34	9		66.6667	60	60	40	62.069	68.9655		1.08363	1.84493	1.20581	0.818961	32	18
	3	5	6	6	92	40		2	3	3	4	56	25		6	8	12	9	386	70		62	59	68	46	417	174		2	2	2	2	37	15		66.6667	60	50	66.6667	60.8696	62.5		0.683137	1.7028	1.7708	0.922797	33	17
	3	4	7	7	80	35		2	2	4	4	50	22		6	7	13	10	331	52		56	57	61	47	414	149		2	2	3	3	30	13		66.6667	50	57.1429	57.1429	62.5	62.8571		1.14677	1.3578	1.59811	0.920843	31	13
	3	4	6	6	76	38		1	2	4	4	50	24		5	7	9	11	314	64		57	55	50	55	415	167		2	2	3	3	25	15		53.3333	50	66.6667	66.6667	65.7895	63.1579		0.818961	1.53946	0.854279	1.41278	41	14
	4	5	7	8	77	27		1	4	4	5	49	16		6	8	10	11	340	41		57	51	51	50	439	155		2	2	3	3	28	11		35	80	57.1429	62.5	63.6364	59.2593		0.922797	1.58843	1.87298	0.873091	42	13
	3	5	7	6	78	26		2	3	5	3	47	18		4	8	8	10	281	40		47	60	37	54	362	152		2	2	2	3	30	9		66.6667	60	71.4286	50	60.2564	69.2308		0.920843	1.76058	1.90483	0.650134	28	17
	5	4	6	7	84	36		2	2	4	5	52	21		6	8	10	10	360	60		41	70	55	47	429	167		2	2	2	2	32	15		40	50	66.6667	71.4286	61.9048	58.3333		1.41278	1.78142	1.33101	0.902726	35	12
	4	4	6	6	88	27		2	2	4	4	55	17		6	7	11	10	348	40		45	53	60	51	394	144		2	2	2	3	33	10		50	50	66.6667	66.6667	62.5	62.963		0.873091	1.42454	1.64237	0.96614	33	15
	3	4	6	6	67	32		2	3	4	6	42	18		5	7	10	5	261	54		52	55	55	31	392	167		2	2	2	3	25	15		66.6667	75	66.6667	94	62.6866	56.25		0.650134	1.46604	0.764151	1.28849	28	1
	3	4	7	7	83	30		1	2	5	4	42	19		5	6	9	10	257	57		57	55	47	50	310	191		1	3	2	3	41	11			50	71.4286	57.1429	50.6024	63.3333		0.902726	1.64732	1.3277	1.03074	35	15
	4	4	6	8	87	36		1	2	4	5	56	22		6	6	10	11	388	53		57	70	56	46	448	147		1	2	2	2	31	13			50	66.6667	62.5	64.3678	61.1111		0.96614	1.35036	1.78398	1.08363	37	6
	3	4	6	6	101	30		2	2	3	4	57	18		4	7	8	8	369	50		47	55	50	45	366	167		2	2	2	2	44	12				50	66.6667	56.4356	60		1.28849	1.29051	1.78304	2.58462	17	16
	5	5	6	4	71	42		2	4	4	2	44	18		6	8	11	8	240	66		41	51	55	57	339	157		2	2	2	0	27	24				66.6667	50	61.9718	42.8571		1.03074	1.4257	1.60186	2.65407	32	0
	4	5	6	6	85	39		2	3	4	4	48	24		6	8	9	11	298	67		45	60	50	55	349	172		3	2	3	3	37	15						56.4706	61.5385		1.08363	1.59811	1.08363	1.84493	24	22
	3	4	7	8	84	32		2	2	4	5	54	19		5	8	10	11	326	57		52	70	51	50	390	178		2	2	3	3	30	13						64.2857	59.375		0.683137	0.854279	0.683137	1.7028	34	18
	2	4	7	6	105	35		1	2	5	3	65	22		5	7	8	10	480	54		72	53	37	54	457	155		2	2	2	3	40	13						61.9048	62.8571		1.14677	1.58631	1.14677	1.3578	31	9
	3	4	6	7	91	37		2	3	4	5	54	23		6	7	10	10	358	66		57	55	55	47	394	179		2	2	2	2	37	13						59.3407	62.1622		0.818961	1.99742	0.962486	1.53946	20	14
	4	4	6	6	94	38		3	2	4	4	54	23		7	6	11	10	294	63		60	55	60	51	312	165		1	2	2	3	41	15						57.4468	60.5263		1.14557	1.34675	1.41314	1.58843	16	18
	3	4	6	6	73	31		2	2	4	6	44	19		5	6	10	5	264	51		61	70	55	31	362	165		1	2	2	3	29	11						60.274	61.2903		0.955583	1.53372	1.6496	1.76058	24	12
	3	6	7	7	64	39		2	3	5	4	38	24		5	8	9	10	229	67		58	49	47	50	360	174		2	3	2	3	25	15						59.375	61.5385		0.920843	1.34917	1.41515	1.78142	22	12
	3	5	6	8	86	40		2	3	4	5	52	24		6	7	10	11	380	64		62	45	56	46	443	158		1	2	2	2	34	17						60.4651	60		1.41278	0.650134	1.84493	1.42454	33	4
	3	5	6	6	79	34		2	3	3	4	51	21		6	7	8	8	337	59		56	49	50	45	426	175		1	2	2	2	28	14						64.557	61.7647		0.873091	0.905632	1.7028	1.46604	39	14
		5	6	4	83	24			3	4	2	49	15			8	11	8	320	41			51	55	57	386	173		1	2	2	0	34	9						59.0361	62.5			0.909792	1.3578	1.64732	24	11
		5	5	8	81	32			3	2	5	48	20			8	9	12	312	46			56	62	52	387	145		1	2	3	3	33	12						59.2593	62.5			0.81206	1.53946	1.35036	33	16
		5	6	9	71	41			3	4	5	43	26			8	9	11	239	66			59	51	44	335	162			2	2	3	28	15						60.5634	63.4146			1.15828	0.902726	1.64732	28	14
		4	6	8	71	34			2	3	4	41	20			7	10	11	263	50			57	55	46	370	149			2	3	4	30	14						57.7465	58.8235				0.96614	1.35036	23	11
			6	5	86	35				4	2	52	22				10	11	345	53				57	78	402	151				2	3	34	14						60.4651	62.8571				1.28849	1.29051	39	11
			5	5	67	35				3	2	40	21				9	7	254	61				60	49	380	175				2	3	27	14						59.7015	60				1.03074	1.4257	29	14
			6	6	81	33				3	4	50	20				12	9	300	56				68	46	368	171				2	2	32	13						61.7284	60.6061				0.81206	1.6496	25	15
			7	7	71	39				4	4	42	24				13	10	259	67				61	47	363	170				3	3	29	16						59.1549	61.5385						26	15
					87	32						52	21						373	50						429	156						35	11						59.7701	65.625						25	16
					77	36						46	22						313	60						409	166						31	14						59.7403	61.1111						23	13
					78	38						48	24						324	66						416	172						30	14						61.5385	63.1579						32	12
						51							33							88							173							18							64.7059							17
						33							20							50							152							13							60.6061							10
						41							27							68							166							14							65.8537							15
						40							25							62							156							15							62.5							10
						23							13							39							167							10							56.5217							4
						30							18							48							159							12							60							12
						46							29							85							182							17							63.0435							13
						41							25							66							162							16							60.9756							9
						46							30							72							158							16							65.2174							17
