# Supplementary material for: Transferrin receptor 1-mediated iron uptake regulates bone mass in mice via osteoclast mitochondria and cytoskeleton
Source: eLife. 2022 Jun 27;11:e73539. doi: 10.7554/eLife.73539 (PMC9352353; doi:10.7554/eLife.73539)
Supplement: Figure 9—figure supplement 1—source data 1. [file elife-73539-fig9-figsupp1-data1.xlsx]

## Sheet: 9B WB quant
Rac1														Arf1
	M-CSF								M-CSF						MCSF								M-CSF
		t-Rac1-1	t-Rac1-2	t-Rac1-3	Rac1-GTP-1	Rac1-GTP-2	Rac1-GTP-3			Rac1-GTP/total Rac1						t-Arf-1	t-Arf-2	t-Arf-3	Arf-GTP-1	Arf-GTP-2	Arf-GTP-3			Arf1-GTP/total Arf1
	con 0	90.385	81.369	72.504	24.019	28.273	24.67		con 0	0.265741	0.347466	0.340257			con 0	58.047	62.892	62.132	48.687	49.368	53.207		con 0	0.838751	0.784965	0.856354
	con 5	88.485	81.53	68.328	62.147	75.763	64.708		con 5	0.702345	0.929265	0.94702			con 5	85.707	92.947	90.26	56.545	60.999	63.041		con 5	0.659748	0.656277	0.698438
	con 15	89.781	84.272	71.492	67.996	82.173	67.932		con 15	0.757354	0.975093	0.950204			con 15	85.999	94.186	87.271	81.397	75.513	88.08		con 15	0.946488	0.801743	1.00927
	con 30	97.177	89.178	76.951	57.703	67.504	59.115		con 30	0.593793	0.756958	0.768216			con 30	91.65	101.153	96.077	78.164	84.35	83.579		con 30	0.852853	0.833885	0.869917
	cko 0	104.132	102.843	88.486	17.813	19.834	18.68		cko 0	0.171062	0.192857	0.211107			cko 0	47.849	51.796	54.108	61.45	59.928	66.699		cko 0	1.28425	1.157	1.2327
	cko 5	96.36	93.381	82.292	34.175	41.142	35.493		cko 5	0.35466	0.440582	0.431306			cko 5	79.894	86.282	83.973	80.591	81.623	87.328		cko 5	1.00872	0.946003	1.03995
	cko 15	97.956	91.726	80.098	47.791	56.623	49.003		cko 15	0.487882	0.617306	0.611788			cko 15	90.275	98.63	95.231	68.387	77.613	75.467		cko 15	0.757541	0.786911	0.792463
	cko 30	102.326	94.294	84.291	23.736	27.493	24.63		cko 30	0.231965	0.291567	0.292202			cko 30	96.523	109.059	102.437	79.17	75.192	77.737		cko 30	0.820219	0.689462	0.758876
	RANKL								RANKL						RANKL								RANKL
		t-Rac1-1	t-Rac1-2	t-Rac1-3	Rac1-GTP-1	Rac1-GTP-2	Rac1-GTP-3			Rac1-GTP/total Rac1						t-Arf1-1	t-Arf1-2	t-Arf1-3	Arf1-GTP-1	Arf1-GTP-2	Rac-GTP-3			Arf1-GTP/total Arf1
	con 0	68.558	61.986	50.446	26.331	30.69	32.35		con 0	0.384069	0.495112	0.64128			con 0	49.762	54.364	54.736	59.886	62.342	64.04		con 0	1.20345	1.14675	1.16998
	con 5	67.194	60.175	48.677	27.121	31.144	31.247		con 5	0.403622	0.517557	0.641925			con 5	75.555	82.236	79.716	61.223	62.772	63.917		con 5	0.81031	0.763315	0.801809
	con 15	57.005	52.114	42.944	18.169	19.286	20.227		con 15	0.318726	0.370073	0.471009			con 15	76.953	83.76	77.855	70.778	71.841	73.859		con 15	0.919756	0.857701	0.948674
	con 30	74.339	65.236	55.764	27.39	34.354	37.095		con 30	0.368447	0.526611	0.665214			con 30	79.481	86.872	84.081	66.334	67.288	69.949		con 30	0.834589	0.774565	0.831924
	cko 0	71.48	66.182	52.655	25.761	31.583	35.242		cko 0	0.360395	0.477214	0.6693			cko 0	78.118	84.067	85.225	58.567	60.974	63.008		cko 0	0.749725	0.725302	0.739314
	cko 5	73.353	68.108	56.594	17.184	20.083	21.329		cko 5	0.234264	0.29487	0.376877			cko 5	77.811	84.705	79.255	60.334	61.689	62.747		cko 5	0.775392	0.728281	0.79171
	cko 15	73.527	67.117	57.397	29.494	34.466	37.118		cko 15	0.401132	0.513521	0.646689			cko 15	72.19	81.918	74.007	59.127	60.22	61.444		cko 15	0.819047	0.735125	0.830246
	cko 30	77.342	69.92	58.565	31.334	37.846	42.362		cko 30	0.405136	0.541276	0.723333			cko 30	50.818	61.347	56.839	60.17	62.533	64.347		cko 30	1.18403	1.01933	1.13209
c-Src
	M-CSF								M-CSF
		p-src 1	p-src 2	p-src 3	tubulin 1	tubulin 2	tubulin 3			p-Src/tubulin
	con 0	31.255	36	37.476	45.64	53.126	48.383		con 0	0.684816	0.677634	0.77457
	con 5	50.355	48.12	52.6	54.15	53.002	49.851		con 5	0.929917	0.90789	1.05514
	con 15	40.222	43.988	43.005	49.187	56.604	52.8955		con 15	0.817736	0.777118	0.813018
	con 30	40.677	46.36	43.063	53.061	57.039	50.7		con 30	0.766608	0.812777	0.849369
	cko 0	5.1	5.572	9.24	57.34	57.346	57.243		cko 0	0.0889431	0.0971646	0.161417
	cko 5	41.426	46.048	47.038	60.01	61.765	62.7873		cko 5	0.690318	0.745535	0.749164
	cko 15	42.334	43.806	40.541	62.902	65.969	68.2355		cko 15	0.673015	0.664039	0.594134
	cko 30	26.198	28.972	33.874	67.291	66.593	74.442		cko 30	0.389324	0.435061	0.455039
	RANKL								RANKL
		p-src 1	p-src 2	p-src 3	tubulin 1	tubulin 2	tubulin 3			p-Src/tubulin
	con 0	13.792	13.398	13.511	36.707	37.703	38.138		con 0	0.375732	0.355356	0.354266
	con 5	31.238	34.793	34.707	37.926	37.66	37.301		con 5	0.823657	0.923871	0.930458
	con 15	41.239	39.172	41.821	43.59	43.95	44.042		con 15	0.946066	0.891286	0.949571
	con 30	48.149	48.516	48.654	52.228	51.809	51.344		con 30	0.9219	0.93644	0.947608
	cko 0	15.083	14.064	13.778	32.217	32.93	32.586		cko 0	0.468169	0.427088	0.42282
	cko 5	40.117	39.419	38.376	39.987	40.013	39.688		cko 5	1.00325	0.985155	0.966942
	cko 15	38.01	37.737	40.029	38.054	38.194	39.573		cko 15	0.998844	0.988035	1.01152
	cko 30	31.174	35.746	36.982	43.629	43.639	43.294		cko 30	0.714525	0.81913	0.854206
