# Supplementary material for: Transferrin receptor 1-mediated iron uptake regulates bone mass in mice via osteoclast mitochondria and cytoskeleton
Source: eLife. 2022 Jun 27;11:e73539. doi: 10.7554/eLife.73539 (PMC9352353; doi:10.7554/eLife.73539)
Supplement: Figure 9—source data 1. [file elife-73539-fig9-data1.xlsx]

## Sheet:  9D-Hem1-HA OE TRAP count
con							cKO
veh			Hem1-HA				veh			Hem1-HA
total-Ocs	podo-OC	%	total-Ocs	podo-OC	%		total-Ocs	podo-OC	%	total-Ocs	podo-OC	%
172	84	48.8372	162	110	67.9012		154	24	15.5844	184	96	52.1739
102	54	52.9412	112	78	69.6429		106	20	18.8679	202	83	41.0891
136	69	50.7353	189	138	73.0159		77	18	23.3766	145	61	42.069
93	40	43.0108	126	102	80.9524		142	44	30.9859	86	46	53.4884
