# Supplementary material for: Transferrin receptor 1-mediated iron uptake regulates bone mass in mice via osteoclast mitochondria and cytoskeleton
Source: eLife. 2022 Jun 27;11:e73539. doi: 10.7554/eLife.73539 (PMC9352353; doi:10.7554/eLife.73539)
Supplement: Supplementary file 1. [file elife-73539-supp1.xlsx]

## Sheet: Sheet1
Gene Name	Fold Change (KO/con)	p-value	con-1	con-2	con-3	cKO-1	cKO-2	cKO-3
Prdx6	-45.8482	0.000158803	5920700	4962400	4134600	67949	145910	123890
Apoe	-17.5603	0.000129862	68112000	51656000	58413000	2332300	4074600	3891900
Nmes1	-7.41202	0.000367162	1788700	1433300	1886400	165020	278370	251950
Tfrc	-6.8477	2.03419e-05	50707000	40148000	56644000	6321500	7335000	7547500
Hpgd	-4.13407	1.86108e-05	25374000	23377000	28865000	6056300	6258300	6230500
Slc11a1	-3.65694	2.23556e-05	5151600	3945800	5344400	1437600	1125300	1338100
Cd40	-3.18219	5.38952e-05	1444400	1195400	1689300	462610	436660	436660
Fcgr2b;Fcgr2	-2.61193	0.000198745	65243000	51997000	77515000	25298000	23818000	23867000
Fcgr3	-2.39301	0.000249359	14005000	10304000	15921000	5567900	5181300	5663300
Tatdn3	-2.39029	2.92823e-06	1504100	1247900	1591400	603380	566770	623250
Ccdc109b	-2.13921	9.56962e-05	7891300	6573700	8569000	3346600	3467700	3812900
Ly9	-2.03295	0.000127107	21542000	16972000	22808000	10869000	8952700	9939300
Aldh7a1	-1.9083	3.42685e-06	20922000	16259000	20445000	9916700	9531300	10318000
Steap3	-1.81029	0.000652674	23057000	18690000	27043000	13069000	11379000	12872000
Serhl	-1.79714	0.00163068	735600	603510	768820	342070	370460	452190
Cat	-1.7935	0.000457915	248620000	213450000	291210000	145330000	128750000	139510000
Slc40a1	-1.78769	5.25281e-05	3364700	2868900	3172200	1711000	1670900	1826900
Epha2	-1.70296	0.0010923	426960	319180	341630	222910	190350	216500
Uchl1	-1.67919	0.000882024	27020000	25316000	31038000	16157000	16258000	16635000
Cald1	-1.67609	0.00138169	297800	273620	318740	163270	163920	200840
Ivd	-1.5657	0.000210579	46004000	41248000	49638000	29921000	27120000	29471000
Vsig4	-1.52519	0.00045288	1494200	1259000	1546300	1004500	878200	905700
Hmga2	-1.5222	0.00107281	65253000	44628000	58799000	36198000	34621000	37750000
C5ar1	-1.50756	0.00129847	28698000	22978000	30796000	19817000	16244000	17942000
Cib1	-1.48835	0.000179345	1668200	1270700	1674900	1004000	971380	1076000
Aoah	-1.48622	0.000802829	9338400	7943500	10461000	6097500	5987200	6309600
Cndp2	-1.48336	0.000255414	549000000	452570000	597550000	359630000	333110000	370020000
Oxr1	-1.47484	4.2568e-05	38636000	31612000	39030000	23985000	23214000	26007000
BC026585	-1.47426	8.31528e-05	9056000	7248500	9145200	5903000	5446500	5678600
As3mt	-1.45833	0.000195807	32395000	28043000	33974000	22472000	19984000	21594000
Plxnd1	-1.45519	0.00119771	16622000	13106000	15327000	9556000	9883400	11180000
Cttn	-1.43286	0.000578782	1004500	773030	952800	598620	598960	683530
Uqcc2	-1.41081	0.000180047	627130	514240	645490	414750	384330	453200
Csf1r	-1.39155	0.000724693	85242000	66222000	90428000	58188000	53093000	59754000
Arl4c	-1.39118	0.00170352	789210	678890	892200	584470	522970	566030
Plcd1	-1.37928	0.000787271	259000	199020	243670	172860	164410	164130
Nlrx1	-1.3689	0.0001045	6876800	5559300	6815200	4567800	4510600	4804000
Fh	-1.3462	0.000280921	127900000	109320000	130230000	95261000	82994000	91994000
Pygb	-1.34064	0.00165668	177970000	149080000	175410000	116970000	119290000	134890000
Cln5	-1.33074	0.000959888	12423000	9606500	12626000	8817600	8292000	8522000
Prkcb	-1.31426	8.43573e-05	57360000	46606000	56571000	42387000	37059000	41328000
Kif21b	-1.30432	0.00071655	1514600	1231100	1530700	1078200	1068400	1088100
Tifa	-1.2999	0.00169969	5038200	4331400	4706100	3727300	3262400	3746900
Prex1	-1.29296	0.000310391	25408000	20741000	25933000	18821000	17723000	18471000
Ttc38	-1.29182	0.000888028	4563300	3928300	4499000	3385400	3230200	3333700
Snx2	-1.28864	0.000839773	201380000	158410000	204380000	153050000	132480000	146430000
Nrp1	-1.2808	0.00109916	23116000	18443000	24258000	17717000	15529000	17434000
Wdr20	-1.264	7.07325e-05	741590	585990	703920	535470	506450	544300
Pla2g4a	-1.26002	0.000476685	17706000	14340000	17614000	12667000	12508000	13750000
Slc35b2	-1.25234	0.00123684	1767600	1353200	1588200	1286200	1154100	1269700
Eif2s1	-1.25107	0.000933107	88091000	67673000	86598000	67093000	58042000	65973000
Gns	-1.23374	0.00153929	96260000	77075000	98794000	74191000	70503000	72717000
Tbck	-1.23178	0.000414166	13783000	11500000	14292000	10982000	9758900	11021000
Fes	-1.23138	0.000928363	15800000	12508000	16007000	11980000	10814000	12744000
Snx5	-1.23099	0.000484493	276930000	225970000	285740000	219640000	197580000	215250000
Bpnt1	-1.23098	0.000641984	42435000	34401000	42850000	33876000	29318000	32903000
Gaa	-1.22859	0.000823098	11952000	10146000	11875000	8973400	8700100	9692700
Lrrc57	-1.21434	0.00148768	16798000	13888000	17532000	13727000	12255000	13231000
Atp1a1	-1.21083	0.000897798	222380000	170010000	211410000	171600000	152720000	167420000
Abhd12	-1.20243	0.00134826	160410000	130760000	150770000	127330000	110560000	125920000
Sars	-1.20165	0.000454987	119450000	93824000	113710000	88705000	84897000	95038000
Tlr2	1.20097	0.00115861	47365000	38058000	46973000	55655000	47910000	53603000
Nfkb2	1.20461	0.00153689	18824000	15697000	19653000	22543000	19654000	22326000
Bid	1.21153	0.00126554	1705700	1358100	1548300	1886300	1720000	1915700
Golph3l	1.22485	0.000229474	1203300	990010	1198300	1376500	1263300	1470000
Pald1	1.22868	0.00153224	23426000	19086000	24845000	27605000	25204000	28859000
Fam105a	1.22902	0.000235544	8588900	7052700	8115500	9737600	8999600	10148000
Parp3	1.22983	0.000807452	8456700	7136500	8894100	10290000	9157000	10326000
Isoc1	1.23187	0.000248717	16781000	12898000	15812000	18952000	17079000	19261000
Aldh1l1	1.24248	4.00113e-06	39010000	31332000	37622000	45373000	41312000	45854000
Ssfa2	1.25411	0.000513735	2279800	1863900	2299600	2806700	2409000	2777900
Adssl1	1.25423	0.000605274	142010000	118580000	149460000	170850000	157160000	180220000
Ugdh	1.25518	0.000165167	17692000	14641000	17278000	21126000	18736000	21789000
Itgam	1.25895	0.00165708	227380000	176280000	224580000	277980000	242440000	259720000
Stat1	1.26294	0.000581751	61758000	49275000	57564000	68974000	67440000	73925000
Osbpl2	1.26378	0.00126247	1922300	1612800	1935000	2449600	2091900	2302700
Oasl1	1.2713	0.000814368	592500	473890	569340	663030	663690	727360
Mcl1	1.27848	0.00159332	4321300	3393000	4278700	5453300	4575800	5119600
Ktn1	1.29174	5.13035e-06	3259500	2590400	3170800	3937000	3615600	3950400
Gsta3	1.29307	0.00145178	24736000	20318000	22813000	30858000	26777000	29235000
Atp6ap2	1.3	0.00128692	7474000	5778800	6930200	9293800	7863000	8769200
Plcb2	1.30068	0.000452154	1300100	995990	1272800	1601200	1430700	1542700
Lrrc8d	1.30271	0.00153628	1461400	1111900	1324300	1773100	1570700	1664600
Ahcy	1.30941	0.00117967	103290000	77025000	94001000	124860000	109610000	119550000
Gvin1	1.31281	2.97337e-06	27902000	22455000	27599000	34530000	31829000	34690000
Pls3	1.33126	0.0011253	99291000	81703000	106650000	133400000	115350000	129270000
Plgrkt	1.35744	0.00135355	6600400	5301600	6142100	8806500	7395500	8043800
Fdps	1.35754	0.000201049	46925000	37468000	47981000	62102000	54067000	61252000
Lima1	1.3627	0.000418362	46211000	35641000	42120000	58514000	50472000	57922000
Lpl	1.36486	0.00143744	1346000	1196200	1425900	1847200	1743400	1766300
Itpr2	1.36654	2.44327e-05	6117200	4890900	6024000	7633000	7186600	8170400
Oas3	1.37952	0.000343954	12906000	9938800	12560000	16125000	15787000	16191000
Cbr2	1.38068	0.000336767	21296000	17695000	22699000	28247000	25875000	30016000
Ide	1.38704	0.00017302	55561000	44785000	55929000	75876000	64883000	73510000
Hgsnat	1.4122	0.00161815	28260000	21182000	26407000	38572000	32671000	34426000
Ptgs1	1.41259	0.00109511	172010	142190	175300	251120	206540	227060
Pnp	1.43394	0.00114164	122840000	104170000	131620000	184030000	150390000	174850000
Fabp4	1.43895	0.000692222	11215000	9453300	11050000	16376000	14054000	14779000
Pkn2	1.45239	2.2249e-05	1899100	1514200	1892400	2602800	2317700	2693200
Pik3ap1	1.48776	1.02213e-05	26220000	21445000	25536000	36640000	32891000	38234000
Arhgap6	1.48934	0.000702967	1204200	1019300	1111200	1600400	1626700	1686600
Siglec1	1.50155	0.0015407	248260000	203570000	246960000	390410000	314380000	335480000
Anxa1	1.51679	0.000489769	622920000	492320000	647230000	953970000	795440000	889500000
Abca9	1.52638	4.97292e-05	1913400	1657200	1886600	2791700	2615400	2839300
Acss2	1.5276	0.000139132	1744700	1406400	1564400	2431900	2206400	2485100
Pcif1	1.531	0.00053094	589850	446460	536240	767730	794150	809980
Dmxl2	1.53221	0.000298807	2385900	1900700	2100400	3366500	2960200	3350400
Tbc1d23	1.53877	2.56135e-05	8605800	6796900	8367900	12707000	11190000	12222000
Itgax	1.54942	0.00110444	2152300	1629000	2008100	2933200	3036200	2865600
AI607873	1.58236	0.000254241	8911000	7449000	8865000	14352000	11686000	13546000
Atp6v0d2	1.58614	0.00105969	1751000	1553100	1757600	2559700	2733500	2656400
Tgfbi	1.59197	0.0016125	4817700	3462800	4536100	7531300	5944400	6645800
Glb1	1.64219	0.000270107	6174900	4666900	6032300	9925600	8325500	9078500
Wdfy4	1.67623	3.70468e-05	8586300	7064400	8889900	13913000	12234000	14540000
Cd48	1.7168	2.72934e-05	10661000	8694200	10994000	18154000	15689000	17642000
Ada	1.72276	0.000963277	7062800	5871400	5941900	11442000	10092000	10632000
Acadl	1.77398	2.20514e-05	17836000	14552000	17311000	31019000	26295000	29968000
Abhd14b	1.77693	4.28821e-05	4670700	3503800	4262700	7397800	7019100	7345200
F13a1	1.77916	3.19631e-05	8875500	7125800	8126000	14921000	13031000	14506000
Ctsl	1.78007	0.000547717	12700000	11116000	12951000	24451000	19166000	21444000
Gm14548	1.81611	0.000812978	5329700	3809700	5330600	9613800	7572800	8677900
Flnb	1.84547	6.485e-05	10477000	8158200	9229600	17799000	15749000	17237000
Tagln2	1.9442	0.000678389	253190000	252210000	283680000	551970000	466510000	503800000
Cd14	2.13697	4.92461e-05	12129000	9751200	12415000	26491000	21811000	24167000
Mcm8	2.23359	0.000138387	1750700	1292300	1714000	3383000	3594000	3463300
Gatm	2.25957	6.84815e-05	31653000	29306000	30745000	69559000	63357000	72753000
Ifi204	2.43756	9.03144e-06	24324000	19162000	21493000	53351000	48825000	54278000
Plekhn1	2.71216	0.000145458	417330	350360	345410	954310	972100	1058400
MLV-related protein	2.75542	6.29077e-05	438030	339610	367100	1125400	966900	1023100
Nt5e	2.82917	0.000345354	122300	107540	111330	309550	268910	388170
Ifi44	2.97474	3.33353e-05	830890	757610	780970	2479000	2129100	2389300
Fah	3.94404	1.75822e-06	2606300	2293500	2527500	9809800	9279600	9922500
Pstpip1	6.65063	6.81543e-05	165960	145250	122670	993920	877610	971780
Pcp4l1	10.4243	0.000643393	790550	708900	416030	7725300	5502400	6054600
Fcgr3	53.87	0.000152717	51008	47053	23093	2258900	1887800	1980000
