# Supplementary material for: Transferrin receptor 1-mediated iron uptake regulates bone mass in mice via osteoclast mitochondria and cytoskeleton
Source: eLife. 2022 Jun 27;11:e73539. doi: 10.7554/eLife.73539 (PMC9352353; doi:10.7554/eLife.73539)
Supplement: Supplementary file 2. [file elife-73539-supp2.xlsx]

## Sheet: Sheet1
Gene Name	Fold Change (KO/con)	p-value	con-1	con-2	con-3	cKO-1	cKO-2	cKO-3
Prdx6	-112.664	1.65842e-06	20002000	24193000	22393000	196890	171180	227430
Rab3gap2	-23.8228	0.00122717	845530	836410	1010900	16275	54847	59925
Tfrc	-7.92868	1.07074e-06	162560000	158590000	179760000	18165000	22672000	22838000
Apoe	-7.6687	3.08808e-06	1168200	1111200	1440900	145230	164270	175860
Cald1	-3.96948	0.000459428	32330	38358	41705	8182	8329.3	12274
Slc11a1	-3.96213	0.00106593	15786000	15948000	19143000	2977500	5639400	4667900
Kif20a	-3.15089	0.000461115	30667	22576	30917	7288.4	9258.2	10258
Arhgef40	-3.00839	3.35853e-05	301050	328010	355910	109910	104480	113710
4931406P16Rik	-2.64516	0.000802962	26147	30796	24982	8791.4	11709	10681
Spp1	-2.56268	0.00267426	406710	534880	526440	169240	166060	244930
Slc40a1	-2.49986	0.000266798	1365000	1263000	1409500	572610	558040	492420
Psmb5	-2.18583	0.000959456	26385000	28712000	28537000	10562000	15350000	12916000
Ercc2	-2.17769	0.000132546	207290	186160	242820	87347	98935	106210
Siglec15	-2.17357	0.000713355	1429500	1372600	1584300	646920	595010	795560
Ppic	-2.11728	1.28172e-06	2459900	2400500	2593100	1081600	1201300	1256000
Trappc6a	-2.04394	0.000750414	409460	424640	400590	195100	184770	228900
Cyp2s1	-2.02911	0.000427591	24768000	23581000	26921000	10239000	14030000	13253000
Tbck	-1.97837	3.54383e-05	3989000	4002800	4620700	1959600	2108400	2332900
Cat	-1.84535	1.81573e-05	241990000	249700000	256710000	129550000	139480000	138190000
Ube2c	-1.82365	0.00243372	7997000	8902400	8775100	3880200	5572000	4819500
Phgdh	-1.78374	0.00275467	1331000	1070700	1311900	572440	794840	732390
Pdlim2	-1.76133	0.000866615	429410	457820	485400	220430	267980	299070
Slc1a5	-1.74681	0.000866521	36480000	30945000	41136000	20232000	20064000	21711000
Rrm2	-1.73726	0.00466649	8131700	8695900	9366000	4090400	6168800	5064000
Pvr	-1.73107	0.00474833	1769700	1914900	2078100	1198000	963310	1190000
Uchl1	-1.72227	0.00606204	109940000	123260000	165020000	68282000	75772000	85585000
Steap3	-1.71811	0.000520658	36333000	36208000	41232000	19111000	25023000	22624000
Rasal2	-1.70978	0.000146792	4910900	4417800	4964200	2646700	2719800	3028000
Rrm1	-1.66797	0.00145164	42321000	44037000	45539000	22485000	30495000	26982000
Anln	-1.66272	0.00089066	2966000	2904900	2863200	1518500	1925100	1857100
Cspg4	-1.64433	0.000360539	13419000	12956000	14984000	8452100	8013300	8751400
Sirpa	-1.62547	0.000140256	11496000	11316000	11555000	6722900	6970000	7555900
Myo1b	-1.62137	0.000404465	58602000	53751000	65026000	32201000	40086000	37660000
Klhdc4	-1.61519	7.60992e-05	2875700	2694300	2984700	1742700	1765900	1804000
Aurka	-1.6085	0.00019072	1533800	1406000	1746800	882010	1009100	1028800
Pnpla6	-1.60796	4.77612e-05	1304300	1203600	1456400	771010	843780	855130
Scin	-1.60658	4.97374e-05	30590000	31454000	32144000	18125000	20094000	20716000
Dcaf13	-1.59528	0.000248971	9430600	8894700	9687200	5161100	6391900	6137500
Rpl22l1	-1.59414	0.000338131	18223000	17672000	20118000	11881000	11426000	11917000
Asns	-1.5909	5.44907e-05	47571000	45946000	48922000	27159000	31986000	30924000
Kbtbd11	-1.54248	0.00249645	2546000	2434400	2877000	1786200	1710000	1609200
Cdk1	-1.54184	0.000498229	26090000	26168000	29071000	15628000	19637000	17849000
Mad2l1	-1.53385	0.00511296	12340000	13454000	13840000	7039000	9637800	9494400
Slc38a2	-1.53302	0.000225613	1681000	1513700	1650000	986250	1058600	1129100
Kif23	-1.52833	0.000751775	1080900	1079600	1193200	637190	818150	756850
Btf3	-1.52828	0.00489449	43288000	48264000	49889000	26562000	36080000	30822000
Fkbp9	-1.51088	0.000359485	3708200	3732200	3856600	2211600	2597300	2725300
Bdh1	-1.51039	0.00123124	12883000	12710000	14487000	7517700	9543300	9707200
Ttll12	-1.50754	0.00485532	13870000	13256000	15167000	7616300	10613000	10186000
2810428I15Rik	-1.50372	0.000112523	2182700	2250100	2513000	1414500	1560400	1663600
Uhrf1	-1.50048	0.000407488	10600000	10090000	11348000	6243800	7783000	7478800
Tk1	-1.5003	0.00156869	6085900	6249900	6447800	3690300	4739200	4200600
Ccdc109b	-1.49674	0.00399651	10006000	10058000	10171000	5613600	7592600	7245500
Prmt10;Prmt9	-1.49426	0.00349953	104820	103790	99416	70012	70472	66465
Kif2c	-1.4852	0.00249544	352720	352630	434520	259080	245720	262140
Dclk1	-1.48468	0.000982021	1455300	1313800	1500800	846410	1064800	984150
Aurkb	-1.47156	0.000410241	2065900	2171700	2192300	1329100	1565300	1500800
Apobec1	-1.46657	0.00174742	2858100	2503500	2845700	1678900	2081700	1868400
Oxr1	-1.46163	0.00084439	39495000	39816000	46423000	28614000	27896000	29628000
Ppat	-1.46127	0.000111901	6196100	6096800	6438300	4075600	4517100	4283000
Apobec3	-1.45966	0.00256143	5775600	4809800	5497700	3632700	3619600	3778000
Cnn2	-1.45496	0.00240099	877370	834660	828730	553590	561760	640940
Pcm1	-1.45396	0.00551253	2942600	2983500	3015300	1727300	2361600	2135800
Ldlr	-1.44828	0.00122154	9758400	9660200	9752300	5939000	7354800	7008600
Nsun2	-1.44339	3.96851e-05	158610000	147100000	167500000	100160000	113620000	115520000
Cd200	-1.44117	0.00143789	288140	264990	310070	203910	197080	199100
Tuba4a	-1.43411	0.00114197	45335000	42614000	49767000	28366000	35675000	32585000
Kiaa1524	-1.4269	0.00209628	4317600	4061800	4998800	2701600	3317700	3405600
Cadm1	-1.42558	0.00314472	5940900	6168400	7119400	4360600	4213700	4957800
Aldh7a1	-1.42226	0.000319052	8773900	8633700	9537800	6198500	6146000	6668400
Bpnt1	-1.42132	0.000195101	35398000	34763000	40484000	23585000	26514000	28067000
Kpna2	-1.42004	0.00162727	21378000	19190000	22671000	12875000	15781000	16171000
Fkbp11	-1.41382	0.00301645	753000	693980	855990	539850	573140	517490
Pmf1	-1.41227	0.00138704	2712600	2596900	2950100	1708500	2176300	2007200
Dut	-1.40676	0.00295469	7676900	7772700	7679500	4875000	6118900	5581900
Hmgb2	-1.40514	0.00093511	114620000	115130000	123740000	75079000	93134000	85149000
Ddx21	-1.39874	0.00103178	176870000	174570000	179580000	113910000	138890000	129550000
Set	-1.39645	0.00283963	122560000	137770000	139090000	84304000	101090000	102370000
Prim1	-1.39305	0.00533495	5254600	5165300	5613000	3233200	4370200	4034600
Psat1	-1.3745	0.00243079	93113000	87284000	97754000	69043000	65164000	68789000
Wdr55	-1.37423	0.000753548	4393100	4416700	4510800	2902900	3467200	3389500
Ivd	-1.3732	0.000931504	30969000	30812000	34439000	23121000	22530000	24645000
Pom121	-1.35791	0.00270139	88461	86170	106740	61994	70020	75728
Hat1	-1.3575	0.00489418	13630000	13057000	14826000	8634300	11387000	10852000
Edil3	-1.35725	4.01001e-05	1114100	1126300	1185900	793150	866280	876260
Impdh2	-1.35443	0.00295856	191070000	184770000	204010000	122190000	156470000	153370000
Pabpc4	-1.35302	0.00143224	28569000	28198000	32117000	19398000	24177000	22531000
Impdh1	-1.35278	0.00337183	20061000	19236000	22281000	13043000	16826000	16009000
Adss	-1.34602	0.000703644	148910000	145240000	164100000	112900000	111690000	116750000
Cep55	-1.34056	0.000141349	11707000	10726000	12596000	8219200	8879300	9100300
Ncapd2	-1.34002	0.00100167	33068000	31804000	34644000	22121000	27163000	25492000
Rps14	-1.33594	0.00321318	68771000	68587000	65887000	48564000	51986000	52226000
Fcgr2b;Fcgr2	-1.3328	0.000487037	6939200	6895100	7192300	5072400	5209300	5564600
Rps2	-1.3326	0.00296027	412410000	441610000	479570000	296230000	366160000	344210000
Mthfd2	-1.32945	0.0020396	44585000	41275000	42859000	30951000	31961000	34325000
Ash2l	-1.32463	0.00390502	3734000	3403300	3861200	2385400	2990800	2993400
Gmeb1	-1.32037	0.00413007	500070	477600	555670	332160	410930	427280
Slfn9	-1.31833	0.000145625	5131300	4694400	5421200	3601200	4019100	3983400
Rrbp1	-1.31628	0.00019631	238900000	241330000	269770000	173040000	196100000	203310000
Bcas3	-1.31379	0.00379494	2639500	2715600	2821200	2111200	2072800	2061400
Dnmt1	-1.30944	0.000130114	59246000	54950000	61125000	41588000	46834000	46032000
Emg1	-1.30869	0.0058094	2339300	2398100	2731800	1670800	2135000	1939000
Tpx2	-1.30676	0.000808961	2194600	2020000	2193100	1551500	1629500	1743300
Baz1a	-1.30668	0.000487118	6769600	6282300	7042300	4666000	5500600	5291000
Plcb4	-1.30581	0.00137957	2403000	2297700	2539700	1765500	1996400	1807500
Thoc2	-1.30197	0.00427955	10796000	9796600	10216000	7080000	8406400	8321000
Smc2	-1.30132	0.00200776	60026000	57477000	63128000	40831000	50782000	48218000
Pwp2	-1.30027	0.000923417	12375000	11735000	12773000	8658000	10285000	9585300
Rps26	-1.29838	0.00145855	99169000	97195000	102210000	68706000	83357000	79502000
Top2a	-1.29794	0.00259025	27031000	25922000	28599000	18209000	22408000	22721000
Eif5	-1.2973	2.70515e-05	27991000	27011000	29218000	20121000	22534000	22574000
Nudcd1	-1.29599	0.00446806	11400000	12258000	12754000	9378100	9544100	9253700
Rpl31	-1.2953	0.0012774	130650000	136670000	146400000	95375000	110680000	115270000
Abcb1b;Abcb1a	-1.29319	0.00266773	22380000	21972000	23360000	15421000	19214000	18134000
Shq1	-1.29238	0.00100263	236090	224130	255960	166530	201110	189520
Ankrd52	-1.29122	0.0031506	1508600	1521000	1666700	1221500	1241200	1185300
Shcbp1	-1.28906	0.00268168	2896100	2728400	3137100	2031500	2509500	2296300
Hirip3	-1.28724	0.00509849	1840800	1834300	1888100	1255000	1575500	1529200
Myo1d	-1.28686	0.00300728	46350000	43241000	49357000	31838000	39722000	37130000
Hmgcs1	-1.28594	0.000529448	12683000	11813000	12860000	8900900	9897600	10404000
Rpl12	-1.28478	0.00021721	192580000	185030000	196790000	140360000	156090000	152670000
Bsg	-1.28397	0.000908737	7298000	7143400	8003100	5452500	6314300	5791400
FRRS1	-1.27551	0.00332606	10919000	9919700	11459000	7618100	9287900	8551000
Mid1ip1	-1.27421	0.00315919	5383200	5266800	5960300	4117900	4178100	4802600
Gnb2l1	-1.27401	0.00258536	413780000	412090000	436320000	297210000	364050000	336380000
Prep	-1.27235	0.00411333	165530000	172370000	179710000	122150000	149890000	137540000
Chaf1a	-1.27188	0.00119919	5916900	5953100	6899400	4794400	4952700	5032000
Csde1	-1.27057	0.00106046	91928000	94022000	96997000	68082000	79439000	76450000
Fcf1	-1.26761	2.16447e-05	522960	515400	559230	388890	433470	444080
Nars	-1.26649	0.000635533	100400000	99886000	106430000	74091000	86928000	82523000
Rpl27	-1.26606	0.00167603	172360000	157910000	174620000	121850000	143510000	135480000
Rplp0	-1.26581	0.00453534	324640000	305320000	342140000	224830000	283220000	265630000
Ncaph	-1.26099	0.00386981	11376000	10665000	13254000	8581600	9378600	10080000
Birc5	-1.26056	0.00084342	536560	510480	542800	390710	424350	452870
Pla2g4a	-1.26005	0.00114686	30445000	27041000	31131000	22040000	23878000	24624000
Nup160	-1.25928	0.00190169	7467700	7271700	7977900	5541700	6594400	6005300
Mki67	-1.25741	0.00012351	23060000	22593000	25353000	17627000	18933000	20139000
Ssr1	-1.25737	0.00625679	42567000	41542000	41184000	29885000	35359000	35071000
Wdr46	-1.25728	0.000178165	5219900	5035000	5741800	3868800	4476600	4435000
BC026585	-1.25522	0.00351906	3549300	3685800	3676200	2770300	3058200	2903500
Npm1	-1.2543	0.00597551	259220000	278780000	276210000	212940000	218300000	220120000
Nol11	-1.25385	0.00229898	3080800	3231900	3485200	2329100	2781100	2749200
Tcf25	-1.25358	0.00320427	989790	982880	1095600	718390	890830	855240
Rps20	-1.25258	0.000739299	105920000	100840000	113300000	77401000	86697000	92828000
Rpl10a	-1.25136	0.000924249	308820000	291680000	319010000	222030000	251640000	265510000
Rpl23a	-1.25028	0.00199956	262560000	267390000	305950000	200090000	231730000	239770000
Eif4g1	-1.24911	0.00392185	210800000	197600000	218150000	148080000	183260000	173800000
Adi1	-1.2485	0.00123162	4868800	4742700	5537600	3666900	4137400	4381100
Papss2	-1.24754	0.0020364	3307400	3316700	3748000	2478600	2999600	2881100
Rpl28	-1.24697	0.00197478	163260000	148570000	173500000	116880000	138870000	135270000
Med1	-1.24695	0.0041038	404000	432150	457910	319370	375290	348010
Zc3h7a	-1.2464	0.000591513	2858500	2944500	3154400	2184800	2531800	2507600
Hsp90ab1	-1.24632	0.00250419	1226600000	1203700000	1269900000	883230000	1070700000	1036000000
Celf1	-1.24586	0.000327978	8934400	8641000	9252000	6883400	7439500	7296500
Nrp2	-1.24299	0.00012046	61992000	61830000	67068000	48644000	53496000	52035000
Hdhd2	-1.24075	0.000895169	10246000	9776100	10491000	7486600	8754000	8491800
Rpl6	-1.24028	0.00430158	345540000	296730000	351420000	248400000	276480000	278170000
Dnttip2	-1.23927	0.000197441	7601800	7446600	8293500	6084300	6343800	6464800
Fanci	-1.2384	0.00281845	356130	340240	368260	254220	299240	312420
Me1	-1.23749	0.00487364	16444000	16322000	17699000	11942000	14919000	14233000
Vars	-1.23734	0.00398459	149220000	148000000	152490000	109470000	131970000	124480000
Tbl3	-1.23671	0.00266346	6262200	6664100	7507700	5172700	5670000	5713100
Ece2	-1.23598	2.81802e-05	2521900	2475100	2726900	1930800	2134700	2212500
Mcm7	-1.23477	0.00530903	48473000	46048000	50614000	34196000	42274000	41993000
Shmt2	-1.23458	0.00112162	136330000	132420000	146540000	110370000	111320000	115750000
Rps16	-1.23437	0.00441324	254970000	258360000	284910000	204370000	234470000	210660000
Usp15	-1.23213	0.00324516	46537000	47486000	49825000	34558000	41625000	41394000
Rangap1	-1.23001	0.000188994	72613000	67738000	78833000	55420000	61520000	61823000
Crtap	-1.22733	0.00069407	3938800	3994500	4330600	3036100	3419300	3591200
Ifrd1	-1.22585	7.67115e-05	1311300	1310300	1406600	1015000	1131800	1155300
Cse1l	-1.22523	0.00108765	100310000	94304000	106320000	75309000	88139000	83334000
Sms	-1.22431	0.00285995	23764000	23443000	24636000	17704000	21237000	20122000
Nop16	-1.22417	0.00491765	19829000	20188000	21167000	14711000	17952000	17692000
Caprin1	-1.2237	0.00274339	105180000	106790000	116050000	79252000	94571000	96010000
Ipo9	-1.22328	2.52065e-05	22100000	21157000	23876000	16935000	19047000	19126000
Pno1	-1.22226	0.00485168	9562600	8916900	9363300	6907400	8144800	7862000
Prex1	-1.22057	0.000335433	18758000	18215000	20388000	14227000	16575000	16434000
Heatr1	-1.21972	0.00178817	26491000	24365000	28831000	19729000	22944000	22918000
Rps27	-1.21949	0.00117587	33600000	31082000	34158000	26086000	27391000	27848000
Smc4	-1.21856	0.000171062	50905000	49762000	56299000	39273000	44977000	45138000
8030462N17Rik	-1.21737	0.00107749	293660	271330	301560	216970	251190	247200
Nap1l1	-1.21727	0.000424176	109510000	105790000	117170000	87423000	90621000	96095000
Heatr3	-1.2166	0.00507674	7497800	7543700	8493200	5762600	7068000	6625700
Fam207a	-1.21534	0.00250922	2858000	2865600	2929600	2229600	2382700	2545100
Nhp2	-1.21456	0.00392758	4027600	3738000	4020000	2910500	3450600	3402500
Kidins220	-1.21401	0.00366322	28867000	27865000	31933000	21492000	25957000	26032000
Rps4x	-1.21392	0.00237397	394960000	359550000	396860000	288420000	327590000	337310000
Serpinb6b	-1.21281	0.00506803	37885000	36101000	39871000	30346000	33407000	30502000
Trmt2a	-1.21235	0.00331585	19628000	19856000	21303000	14841000	17559000	18087000
Itpr3	-1.21195	0.00222616	11808000	11194000	12388000	8755500	10514000	10108000
Adam10	-1.21115	0.000934252	5632500	5711200	6161700	4687500	4921600	4892000
Nat10	-1.21106	0.000602631	30131000	28598000	31839000	22868000	26607000	25680000
Krr1	-1.21092	0.00404983	11309000	11419000	11977000	8530700	10315000	10014000
Umps	-1.21031	0.000218812	56898000	55019000	63476000	44991000	49202000	51218000
Rpl21	-1.21012	0.00144983	246480000	229100000	272970000	196840000	207280000	215660000
Ndufaf2	-1.20892	0.000561129	2980000	2735600	3106700	2253300	2510300	2563500
Gm10260;Rps18	-1.20814	0.000893157	290200000	293980000	331330000	241460000	262490000	255840000
Naa10;Naa11	-1.20778	0.00569674	3543700	3328600	3565100	2786700	2810600	3082800
Gnl3	-1.20658	0.00143826	48088000	44936000	52180000	36265000	42453000	42177000
Nup214	-1.20651	0.00229336	23485000	23871000	27486000	18963000	21138000	22142000
Rpl5	-1.2042	0.00064665	460320000	428780000	469620000	349210000	386920000	397410000
Ttc27	-1.20406	0.000402957	10270000	9809600	11434000	8328400	8869300	9037100
Utp15	-1.20401	0.000554989	16945000	16418000	17677000	13198000	14988000	14409000
Lpl	-1.20373	0.005302	10417000	10133000	10899000	8596400	9070500	8557300
G3bp1	-1.20336	0.000721222	130720000	126010000	139700000	106090000	109160000	115350000
Inf2	-1.20212	0.00415967	59995000	57613000	64626000	44867000	54858000	52849000
Utp20	-1.20122	0.000879872	20022000	19034000	21177000	15622000	17845000	16896000
Rrp1	-1.20062	0.00147136	5670300	5633100	6293100	4401900	5221800	5111500
Ehhadh	1.20099	0.00271786	311340	306130	359570	379260	401010	394870
Rap2b	1.20116	0.00378134	24667000	22854000	25579000	26371000	31661000	30277000
Idh3a	1.20174	0.000862048	90721000	85591000	99506000	104710000	110470000	117270000
Acsl1	1.20345	0.000406469	188950000	188390000	202590000	217520000	246450000	237180000
Mtm1	1.20379	0.000905477	2733500	2745600	3146100	3231600	3504900	3678700
Sucla2	1.20432	5.26676e-05	49597000	48234000	53678000	57647000	61458000	64044000
Lrpap1	1.20465	0.00285614	78997000	80695000	82829000	91033000	97780000	104900000
Tcp11l1	1.20482	0.00163768	1032400	1013900	1174100	1179200	1381800	1334400
Dnajc19	1.20669	0.000369337	3351800	3330200	3696700	3914400	4190700	4471000
Fyb	1.20723	0.000267716	45067000	44293000	47480000	52872000	55883000	57092000
Asph	1.20749	0.000842772	37817000	35964000	38417000	41773000	47493000	46904000
Nsdhl	1.20769	0.00269145	10675000	9790000	11549000	12559000	13108000	13064000
Aldoa	1.20818	0.00276867	71940000	71575000	80554000	80313000	96492000	95485000
Arl3	1.20864	0.000459643	4361000	4409900	4879200	5072200	5612900	5886800
Serpinb9	1.2093	0.00099123	16320000	16450000	17543000	19701000	20816000	20545000
Acox3	1.21108	0.00152962	16477000	16642000	17463000	19912000	20684000	20892000
Atp5c1	1.21116	0.00375261	189100000	183210000	211450000	222310000	230200000	257270000
Tlr2	1.21481	0.00128435	24788000	25211000	26214000	28212000	32621000	32282000
Akr1b10	1.21587	0.0025362	14351000	14861000	15162000	16818000	19077000	18326000
Gltp	1.21763	0.00471031	25009000	23177000	28873000	28766000	32524000	32667000
Hibadh	1.21779	0.00593615	16815000	15780000	18260000	18590000	20687000	23017000
Akr7a2	1.21796	0.00486755	8308100	8079300	9502500	10387000	10311000	10885000
Rgs10	1.21937	0.00189728	23555000	22102000	24181000	27431000	28025000	30034000
Aldh4a1	1.21949	0.00114582	6790600	6615300	7124100	8095600	8264600	8775200
Comt	1.22136	0.00419135	28663000	27403000	30858000	34480000	34125000	37965000
Lypla1	1.22206	0.000851983	11924000	11396000	13368000	13649000	15375000	15981000
Malt1	1.223	0.000187671	13626000	13362000	14648000	15723000	18031000	17408000
Samd9l	1.22329	0.000879863	16646000	16135000	17198000	19157000	21661000	20613000
Parp14	1.23009	0.00425057	19734000	19085000	19890000	23881000	24088000	24519000
Cmpk1	1.23118	0.00347753	77963000	76528000	82572000	96699000	94910000	101340000
Nsf	1.23237	3.038e-05	118180000	113960000	124700000	139340000	149560000	152580000
Naprt	1.23255	0.00585659	602760	574110	576510	686230	729890	754460
Eif2d	1.23257	0.0051942	1648800	1534600	1859100	2012200	2017700	2194700
Ifi47	1.23296	0.000320416	21558000	19924000	22542000	24246000	27384000	27650000
Uqcrc1	1.23524	0.00293379	145280000	132140000	151370000	172300000	173400000	185440000
Gda	1.23594	0.00293996	40583000	37584000	42372000	49255000	49080000	51058000
Aldh3b1	1.23773	0.00022021	22933000	21828000	24329000	27541000	28774000	29478000
Ptp4a2	1.23792	0.00198325	5346700	4951700	5451700	6369400	6466000	6725400
Tmem147	1.23927	0.00374768	648600	638850	735230	833340	849150	828880
Fdps	1.24008	0.00269587	103040000	94217000	106400000	111840000	133780000	133180000
Blvra	1.24084	3.92691e-05	165400000	158190000	174770000	195910000	209340000	215490000
Galns	1.24262	0.00303164	13474000	14206000	14920000	17340000	17503000	18264000
Lrrc25	1.24472	0.00588035	16207000	15758000	16196000	19491000	19371000	21372000
Atp5d	1.24625	0.00429116	28739000	29962000	35279000	36880000	39365000	40971000
Akr1a1	1.24714	0.000541402	207170000	208470000	215150000	243950000	273750000	273030000
Gbas	1.24737	0.000598819	26277000	23950000	27187000	30487000	32488000	33915000
Mroh1	1.24955	0.00300038	11447000	10762000	12528000	14155000	14017000	15352000
Ethe1	1.25002	0.00025923	4447100	4331100	4707000	5135000	5774100	6041600
Mpst	1.25119	0.00217378	5103600	5114500	5170000	5840200	6726200	6806900
Eif4e3	1.25286	0.00282331	990500	883480	968830	1095200	1255800	1226300
Map4k4	1.25346	0.000630875	3124600	2893000	3409500	3774200	4069000	3998100
Adam9	1.25376	0.00283405	4134700	3985800	4522800	5251100	5128600	5517800
Gyg1;Gyg	1.25402	0.00224211	20586000	20642000	22288000	25892000	25743000	28346000
Esyt1	1.25481	0.0040189	114850000	101460000	111760000	131110000	143660000	138190000
Ak3	1.25672	0.00436891	33165000	30549000	32481000	39152000	39439000	42790000
Coro1b	1.25804	0.00169083	146770000	145080000	147560000	178090000	186860000	190170000
Pla2g15	1.25986	0.000275301	6044800	5950200	6266800	7305100	7751900	8051900
Mov10	1.26	0.00165612	4463300	4078700	4504400	5351400	5598700	5538300
Oxct1	1.26197	0.00355237	67916000	66782000	74123000	88343000	85231000	90775000
Slc25a20	1.26202	0.00300696	7508700	8064800	8262800	9743500	10363000	10076000
Coq5	1.2623	0.00210164	3252800	2967800	3338800	3836100	3941400	4337400
H1f0	1.26256	0.00485801	14157000	12899000	14646000	17654000	17766000	17361000
Scarb2	1.26274	0.000504179	3968700	3801800	4204800	4914200	5195700	5061000
Rmdn3	1.26432	0.00104681	3023100	3007200	3132900	3694300	3826900	4118700
Aldh6a1	1.26493	0.000640436	4010100	4091500	4577500	4953000	5384900	5765300
Ap1s2	1.26656	0.00167676	4246800	4112300	4257600	4932300	5717600	5419100
Tmem106a	1.26851	0.00064609	2467700	2388800	2481100	2952600	3156800	3240000
Bphl	1.27021	0.000891502	11874000	11717000	12017000	13852000	15697000	15941000
Naga	1.27158	0.000205017	14210000	14409000	16056000	18023000	19717000	19241000
Plek	1.27205	0.000569754	29149000	26859000	30416000	34189000	36762000	39450000
Aldh3a2	1.27299	0.00226281	18705000	16544000	18898000	22100000	22795000	24225000
Idh1	1.27476	0.00598067	219380000	197180000	226860000	269400000	260840000	292640000
Mitf	1.27558	0.00441514	1219200	1212400	1331900	1621100	1543200	1652300
Bst1	1.27624	0.00446005	2552400	2290200	2838200	2944800	3531900	3354300
Rab11fip5	1.27634	0.00240929	6965800	7075100	7299400	8482500	8938500	9979500
Mtss1	1.27637	0.00188534	8755100	8798400	10155000	11138000	12658000	11671000
Rab8b	1.27664	0.000261114	22615000	21326000	23144000	27440000	29030000	29493000
Rgs19	1.27678	0.00598696	3924300	3703300	4011200	5017200	4753000	5146900
Stab1	1.27722	0.000236101	21805000	20936000	23254000	25432000	29231000	30097000
Acad10;Acad12	1.28256	0.00398368	3408500	3217000	3516900	4246800	4134600	4687200
Mtg1	1.28331	0.00154638	783620	787930	899730	1004900	1032500	1144700
Pepd	1.28352	0.00319262	65212000	65329000	65160000	82330000	84996000	84853000
Nt5c3a	1.28423	0.000249001	13847000	13606000	14982000	17716000	18179000	18778000
Aph1c	1.28608	0.00128896	149280	145490	173230	193530	198390	210860
Acadvl	1.2893	0.00282711	54702000	50621000	59493000	69958000	68396000	74645000
Avl9	1.29324	0.00477493	181600	185950	193840	212870	247080	272300
Man1a1	1.29528	0.00177488	3768000	3757300	3774700	4743500	4989300	4963900
Rnf213	1.29548	0.00225601	313720000	283440000	305460000	358510000	418320000	398330000
Dtx3l	1.29551	0.000935549	7604300	6969900	7595500	9295900	9714900	9804800
Nceh1	1.29573	0.00124965	106060000	103800000	113170000	139490000	139360000	141040000
Kctd21	1.2964	0.0060221	691710	682720	727960	923090	860960	953390
Ncf2	1.29877	0.0027273	70470000	68923000	74317000	93537000	90250000	94761000
Hk3	1.30049	6.96094e-05	88934000	84402000	92380000	109950000	116820000	120120000
Tbc1d4	1.30674	0.000306761	967960	899170	981240	1168500	1251900	1317800
Wdfy4	1.30675	0.000700999	7895400	7450700	8588100	10227000	10279000	10848000
Edem1	1.30704	0.00471869	1343100	1343000	1327200	1550700	1897000	1838200
Poglut1	1.31064	0.00196071	10239000	9155500	10156000	12697000	13087000	13049000
Atp6v0a1	1.31343	0.00171124	17753000	15336000	18540000	21355000	23313000	23239000
Gstm1	1.31502	0.00145803	123770000	126490000	127970000	149570000	171440000	179730000
Pml	1.31518	0.00079575	7614600	7609200	7657700	9396100	10477000	10372000
Npl	1.31521	0.00243052	11322000	11658000	12347000	13648000	15982000	17195000
Gpx1	1.31571	0.00571232	13195000	13301000	13178000	17627000	17121000	17657000
Coro2a	1.31703	0.00355505	621680	627710	633440	828270	806140	855540
Tmem173	1.32132	0.00620261	643010	640410	716730	903850	829040	919160
Glrx	1.32311	0.0010983	79353000	84599000	84305000	103380000	112470000	114050000
Vasp	1.32347	0.000150777	49234000	45552000	50703000	60967000	64814000	67482000
Lztfl1	1.32434	0.00373737	6633200	6197700	7255000	8907900	8431800	9330300
Sh3bp1	1.32437	0.000734336	21119000	20335000	21632000	27361000	27560000	28949000
Acp2	1.32934	0.00298922	35831000	36999000	36763000	48428000	48086000	49734000
Ireb2	1.32948	0.000467685	2594400	2671500	2829200	3494700	3567800	3738500
Pon3	1.33249	0.000890153	45166000	42787000	46740000	59355000	58932000	61802000
Pvrl1	1.3347	0.0038935	270690	265100	327740	380080	392640	379050
Samhd1	1.33562	0.000661717	65815000	61326000	67041000	78029000	93160000	89718000
Lima1	1.33632	0.000421482	18300000	17355000	19233000	23827000	24036000	25747000
Cnrip1	1.33805	0.00527324	4388200	4836400	4868800	5507400	6879900	6608800
Drg2	1.34642	0.00022048	27318000	25600000	29405000	35858000	38089000	37177000
Pik3ap1	1.3513	0.000241788	13396000	12407000	13947000	17356000	18454000	18065000
Pld3	1.35586	0.00240155	8080500	9103400	9594400	11337000	12774000	12288000
Tbc1d23	1.36123	0.000501315	9807800	9437000	11105000	12396000	14803000	14292000
Acadm	1.36222	0.00134228	31528000	31412000	34478000	44760000	43379000	44969000
Galc	1.36324	0.00528935	2557300	2513500	2896700	3680200	3362600	3856000
Bcl2l1	1.36414	0.000378334	1063700	1015800	1197800	1421500	1469800	1590700
Ldhb	1.36511	0.00141144	2983600	3251900	3646000	4216000	4679300	4614400
Amdhd2	1.36557	0.0019412	19424000	19147000	21155000	26593000	25726000	29625000
H2-D1	1.37052	0.00330708	138790000	138390000	131210000	178000000	193400000	190640000
Flnb	1.37144	0.00010047	40323000	39068000	42361000	50813000	59418000	57674000
Bin2	1.37808	0.00461248	9351200	9316300	10790000	13830000	12665000	14208000
Casp1	1.3787	0.00065623	34076000	34281000	36150000	47654000	47226000	49744000
Trim21	1.38001	0.000208077	4149900	4114300	4264100	5568700	5876200	5915100
Arhgap25	1.38129	0.00595771	6139600	5883300	6381900	8920500	8025300	8584600
Slfn5	1.38175	0.00152659	16319000	14580000	15468000	20684000	21700000	21882000
Aldh1l1	1.38302	0.000136675	22634000	23072000	23785000	30353000	32588000	33603000
Fem1aa;Fem1ab	1.38688	0.00554722	832090	743940	789440	962030	1100200	1245900
Themis2	1.38752	0.00127884	4506900	4237000	4677300	6276400	6272400	6130700
Ninj1	1.38927	0.00086577	4481400	4713500	4873400	5962800	7100300	6595200
Daglb	1.39304	0.00370656	2296300	2323100	2678300	3481800	3220000	3484900
Trim14	1.39869	2.68387e-05	3018600	2934200	3250700	3905800	4505100	4529200
Emr1	1.401	0.000770008	27160000	24403000	26896000	34135000	36455000	39849000
Ifih1	1.40186	0.000335883	7280200	6782300	7172000	9228900	10482000	10202000
;9930111J21Rik	1.40298	0.00235287	1320500	1304700	1405800	1794700	2099100	1796000
Stard5	1.41334	0.000806408	2299200	2214100	2551700	3338000	3237300	3433000
Parp3	1.41357	0.000154327	2951800	2700500	3003200	3727700	4243800	4323900
Hpgds	1.41462	0.000166522	4963000	5261400	5486000	6899200	7688400	7733800
Hfe	1.41561	0.00478567	1268900	1104200	1281200	1735400	1606200	1848100
Zbp1	1.41994	0.00046006	5382400	5079700	5470200	7472400	7474400	7755300
Man2b2	1.4236	0.00221974	4232000	4498400	4246500	5974500	6369500	6200100
Fam105a	1.4243	3.92463e-05	6789400	6343200	7080600	9123500	10005000	9764300
Tap2	1.42465	0.000197933	20913000	19230000	21846000	28444000	29133000	31011000
Pla2g7	1.42585	0.00519612	8969200	8455700	9203700	13356000	11871000	12910000
Abca1	1.42969	0.00084533	7315500	7140500	7402300	10304000	10118000	10964000
Prdx5	1.43129	0.0015144	213450000	211380000	216580000	310550000	299480000	311650000
Dpysl2	1.43172	0.000391973	100370000	97723000	100140000	138720000	145120000	144850000
Pilrb2	1.43186	0.0018544	683510	622290	725190	969690	916770	1030400
Itgb2	1.43293	0.00141779	230040000	215730000	231720000	326990000	311970000	335510000
Slc7a11	1.43409	0.000725862	798260	854620	975410	1201600	1289000	1281800
Mpeg1	1.43494	0.00108479	8643000	7942100	9023900	12284000	11783000	12791000
Evl	1.43558	0.000450236	17160000	18412000	18760000	24429000	27548000	26360000
Itgam	1.43618	0.000131207	142940000	136360000	142410000	188630000	208050000	211950000
Isoc1	1.43874	0.000853707	11383000	10798000	11345000	16111000	15965000	16333000
Paox	1.43948	0.00237077	3144200	2962900	3594400	4650100	4377400	4963600
Gbp4	1.43991	0.000122313	7559500	7136200	7746200	10165000	11450000	10843000
Cd36	1.44088	0.00121456	21035000	19707000	22345000	27718000	33973000	29767000
Rftn1	1.44253	2.04722e-05	4193800	3900400	4467700	5626500	6176800	6385200
Fabp4	1.44365	0.000117216	17387000	17837000	18957000	25046000	25907000	27577000
Mdp1	1.44404	0.00089636	2141100	2080000	2402500	3093800	3035900	3470000
Cox5a	1.44506	0.00593791	47133000	41915000	52510000	71707000	66174000	66734000
Alox5	1.44709	0.00198728	1856700	1555800	1869100	2516300	2564500	2564800
Sfxn2	1.45512	4.98014e-06	901480	858080	983580	1251800	1355900	1397100
Marcksl1	1.45624	0.000238522	10546000	10481000	12214000	15725000	15989000	16774000
Irgm1	1.46025	0.000167618	19276000	18234000	19696000	25575000	30036000	28386000
Nagk	1.46235	0.00118107	12008000	10944000	12896000	17404000	16651000	18500000
Atp1a3	1.47459	0.00064554	2583800	2299400	2552900	3545500	3576400	3879700
Cbr2	1.47515	0.000484506	15428000	16026000	15806000	22398000	24037000	23571000
Ptms	1.48032	3.986e-05	10844000	10717000	12037000	15938000	16476000	17481000
Gbp7	1.48308	0.000229307	13476000	12975000	13664000	17749000	21012000	21140000
Stat2	1.48923	0.00123684	7045400	6135500	7591400	10270000	10150000	10518000
Ehd4	1.49776	6.82175e-05	113620000	103240000	115540000	158050000	170500000	170940000
Prkar2b	1.49807	0.00152469	13523000	13253000	14074000	20198000	19025000	22324000
Atp5c1	1.49958	0.000905734	745590	802750	781230	1060000	1184000	1270900
Cmpk2	1.50666	0.000149417	7374800	6871200	7412500	10615000	10926000	11205000
Iah1	1.50685	5.86558e-05	13096000	12894000	14408000	19693000	20043000	21334000
Irgm2	1.5082	0.000884582	3090700	2816500	2959800	4428700	4398100	4590600
Selenbp1;Selenbp2	1.5085	0.00065465	4759600	5087000	5282600	7613500	7695300	7580700
Fabp5	1.51402	0.00538232	216800000	247140000	215060000	338180000	345500000	346230000
Optn	1.51411	0.00107359	369320	405330	459270	583100	614930	673260
Trim30a;Trim30d	1.52098	0.000133214	1999300	1813000	2082400	2778900	2990000	3233500
Mic1	1.52233	0.000217192	3327600	3214600	3671800	5160500	5086200	5340500
Lgals3bp	1.52611	0.000606595	35499000	34335000	34593000	52421000	52480000	55107000
Ddah2	1.52732	0.00115195	534750	605670	651830	857740	974530	910250
Tnfaip8l2	1.52758	0.00300094	9087100	8752000	9659700	14792000	12954000	14457000
Ahnak2	1.54209	0.000927011	5823300	5608600	7054300	9141000	9207400	10155000
Ahnak2	1.5427	0.00230609	69707000	71882000	82405000	96275000	126280000	126140000
Oasl2	1.54927	0.00546078	1481300	1343300	1280000	2167700	2047100	2159100
Rab3il1	1.55045	0.00582934	3901100	3634300	3960900	4758500	6598400	6743200
Mtmr12	1.55132	0.00117088	964530	909510	1071000	1573200	1460900	1543900
Clec4n;Clec6a	1.55171	0.00293275	309360	330020	300470	435810	538900	493670
Pdlim4	1.55444	0.0011197	5428800	5728800	6705000	8779700	8885700	10156000
Col1a2	1.55577	0.00368096	1467200	1491300	1767900	2414900	2213500	2756600
Fam63a	1.55856	0.000923114	7022300	6687500	7596300	11346000	10490000	11479000
Stxbp1	1.55897	0.00561873	7449900	6498700	7665500	11948000	10115000	11770000
Sod2	1.56088	0.00100286	36467000	40125000	37609000	57189000	60381000	61307000
Tlr3	1.56151	0.000277034	444600	462900	496250	725680	751530	721280
Tbxas1	1.56429	0.00365461	7728500	6966100	8073500	12543000	10824000	12397000
Tgfbi	1.56573	0.000103183	3228700	3431700	3652500	5121000	5384000	5699300
Gas7	1.56706	0.00207594	17591000	14924000	18589000	26873000	25181000	28074000
Gvin1	1.56885	0.00236743	680770	708560	679520	982190	1232800	1057400
Oxsm	1.57931	0.000867568	2118600	2027700	2005800	3175200	3158200	3424000
P2rx4	1.59449	0.00078798	8931600	8474100	8722200	14032000	13396000	14402000
Oas3	1.60857	0.00217207	21962000	21886000	21438000	30804000	40369000	34889000
Mtmr14	1.61074	0.00176774	290840	282060	308040	464580	430010	534740
Pnp	1.61438	0.00143125	113630000	125770000	113870000	182720000	196580000	192830000
Mrc1	1.62036	5.62115e-05	56455000	52174000	57444000	87391000	90762000	91805000
Dcxr	1.62113	0.00219478	26517000	26069000	27328000	45613000	39776000	44875000
Tagln2	1.63323	0.0027223	509930000	456010000	521030000	852570000	735980000	850930000
Glb1	1.63882	0.00562213	4164000	4463900	4387900	5709700	8339800	7626200
Sp100	1.64993	0.000727531	6046700	5200400	5652200	9158000	9137900	9650000
Ddx58	1.65921	0.00020294	51664000	51155000	50680000	82341000	85916000	87485000
Psmb9	1.66515	0.000217606	5837500	5988700	5817800	9076400	10303000	10158000
Dbi	1.6695	0.00252799	58582000	61334000	79862000	108750000	106660000	116450000
C1qb	1.6759	0.00142456	3439900	3396900	3283800	5803900	5386600	5844100
Oas1a;Oas1g	1.67925	0.0015279	19380000	18394000	19065000	33752000	31130000	30984000
Gpr84	1.69459	0.00212468	3801600	4053300	4252100	7255400	6254300	7107800
Gatm	1.69987	1.73833e-05	35557000	36399000	38335000	59905000	62757000	65575000
Nit1	1.71369	0.000904374	3075000	3336700	3324700	5742300	5345800	5657400
Cybb	1.7317	0.000293495	66819000	64026000	72845000	120860000	116560000	116210000
Pltp	1.73849	1.2544e-05	5365500	5245200	5722800	9253800	9609400	9626800
Trex1	1.73933	0.00564115	21817000	17404000	20232000	37646000	31247000	34762000
H2-T24	1.74207	0.00610428	412710	316020	415600	721070	621540	646830
Hgsnat	1.78296	0.000736224	5638400	4516600	5921000	8939900	9953000	9716400
Ifit3;I830012O16Rik	1.79306	0.00106379	7623300	7039100	8239800	14266000	12471000	14493000
Mapkapk3	1.79514	0.00323087	427680	454980	397120	768030	699180	842100
Gpr137b	1.79597	0.00100526	2413800	2139500	2303600	4299900	3914300	4142000
Tcn2	1.81603	0.00434486	38819	36477	37908	60917	61747	86459
S100a8	1.81716	0.00136183	53941	51317	57722	90750	90438	118170
Padi4	1.81857	0.000156455	329320	335180	374310	625280	600400	669580
Ctss	1.83769	0.00064285	71999000	76060000	68575000	128090000	137530000	133830000
Uba7	1.8535	0.00026183	1978700	1954300	2113800	3867500	3597200	3784600
Irg1	1.88384	5.02417e-05	7709600	7202600	7451500	13310000	14220000	14785000
Lgals3	1.91084	0.00137522	434770000	438090000	462240000	915890000	761690000	890730000
Srpk2	1.91283	0.000583587	2512000	2025700	2464300	4078800	4377000	4972900
Oasl1	1.91435	0.00176239	4175600	3923900	4132900	6297600	9232700	8265200
Gm14548	1.91585	0.000259354	7108000	6071400	6645500	12461000	12535000	13061000
Mmp12	1.92149	0.000786282	5568300	5925600	5790600	11242000	11903000	10247000
Dhx58	1.96037	0.000205342	6745500	6441600	6374200	12490000	13462000	12554000
Fabp7	1.97109	0.000482673	8946100	9483400	9501800	18929000	17071000	19326000
Phf11;Phf11c	1.98883	0.000442811	3175600	2810100	2759200	5304800	6053600	6101600
Stim2	2.02366	0.0016592	233450	289830	285630	574510	546020	516480
Ifit2	2.05625	0.000512591	3828800	3696600	4103500	6579600	9210600	8428800
C1qa	2.09087	0.000122018	338960	373680	400680	757630	746890	829310
Acadl	2.09256	0.00202129	16110000	16540000	15713000	38092000	31222000	32631000
Ptges	2.0933	4.49115e-05	741810	673570	769230	1519800	1492100	1572700
Siglec1	2.10843	5.31894e-06	47599000	44347000	52162000	97195000	104650000	102640000
Abhd14b	2.11142	2.71079e-05	4017100	3906700	4394200	8440700	8344800	9322600
Ccsmst1	2.16272	0.00521598	12344	14218	13177	21309	30324	36624
Cd48	2.16617	0.00210836	2368900	2569200	3304300	5346900	5395800	7167200
Hrsp12	2.16678	0.00519081	57423	66662	52704	143320	111800	129570
Ada	2.17204	0.000113643	5327200	5174900	5012100	10705000	11074000	12082000
Aif1	2.18346	5.60367e-05	7013900	6835100	7423300	13436000	16139000	17282000
Ddx60	2.20303	6.05867e-05	193310	183770	184680	406240	416060	419830
Gbp9	2.21045	1.4e-05	489750	509010	557750	1031800	1181700	1245900
Gmfg	2.21255	1.79455e-05	29187000	28341000	29050000	59111000	64412000	69151000
Lgals9	2.26552	0.000338437	1659600	1607000	1705700	4056200	3608700	3655600
Ifit1	2.26726	7.85737e-05	6509700	6201900	6724400	15170000	14525000	14526000
Tmem260	2.33372	0.00207105	135710	113300	113500	275740	242720	335260
Scarf1	2.42915	0.000820604	13896	12239	10840	27141	31137	31632
Scly	2.44833	9.74269e-05	210810	194070	222710	504650	473190	566470
Ifi204	2.45892	0.00124905	26026000	25798000	23871000	50365000	76373000	62666000
Acss2	2.46756	0.000638391	1171800	1109800	1234200	3155000	2517000	3071900
Isg15	2.52367	0.000136608	7289800	7677700	7185600	16735000	20895000	18700000
Ctsh	2.54657	0.000297914	1972000	1884300	1804400	4992900	4467600	5021500
Itgax	2.54686	0.000713064	15118000	13963000	14842000	42245000	34024000	36427000
F13a1	2.58039	0.000538957	3086700	2779300	3139500	8393100	6754500	8257200
Marco	2.77946	0.000316491	53558	51258	73042	144380	166230	181480
Hebp1	2.88523	0.000396447	32483	35543	39207	115500	96916	98252
Entpd1	3.22314	2.2256e-05	1378100	1392400	1410500	4536700	4279500	4722000
Pcp4l1	3.54327	4.47028e-06	245360	225850	273900	867240	894720	880250
Dhtkd1	3.76016	0.00580881	12840	27565	25910	82644	75917	78607
Pstpip1	3.93402	0.000298137	105020	76458	92129	297720	425210	359910
Gbp1;Gbp2b	4.01324	3.19888e-06	836860	729490	861820	3158900	3260400	3340200
Pyhin1	4.72612	2.22986e-05	801940	771020	738420	3707100	3487500	3771200
Prmt5	5.0182	0.000439631	136720	84558	144670	578170	577890	639900
Ifi44l	5.36349	2.80702e-05	1485400	1474000	1375200	7046900	8910400	7484400
Fah	5.38502	2.32739e-05	663560	692870	641820	3747500	3498200	3555700
Ifi205a	6.2117	0.00019195	61255	56464	43997	297980	380230	325640
Ifi44	9.15473	1.05904e-05	1625200	1464500	1425200	14204000	14105000	13141000
Dusp12	11.6594	0.000348068	145680	145230	85716	1513400	1328800	1445900
Pnp2	17.4081	7.74065e-05	0	0	0	66859	43216	56356
Mnda	27.0409	9.48707e-05	1537100	1629400	940510	36619000	35308000	36440000
Acy1	104.301	2.27042e-05	13336	8727.6	7346	1044800	927700	1012500
