# Supplementary material for: Transferrin receptor 1-mediated iron uptake regulates bone mass in mice via osteoclast mitochondria and cytoskeleton
Source: eLife. 2022 Jun 27;11:e73539. doi: 10.7554/eLife.73539 (PMC9352353; doi:10.7554/eLife.73539)
Supplement: Supplementary file 3. [file elife-73539-supp3.xlsx]

## Sheet: Sheet1
Gene Name	Fold Change (KO/con)	p-value	con-1	con-2	con-3	cKO-1	cKO-2	cKO-3
Trappc13	-111.711	0.000776158	26472000	27375000	25702000	154160	171750	694470
Aco2	-79.0419	0.00366978	3440200	2723000	2605700	10079	71940	93817
Esf1	-38.6641	0.00121867	1731100	1603000	1419400	18859	71780	69275
Kidins220	-29.4066	7.92229e-06	396380	307030	371730	12717	13752	13999
Prdx6	-17.3907	5.37327e-08	3107800	3023400	2726600	192550	203380	171180
Actr3	-14.8498	0.000157004	1831100	1583100	1483300	84669	154400	138230
Jmjd1c	-7.79775	2.85748e-05	5326700	4460200	4186700	621550	801000	579900
D2hgdh	-7.07534	1.76984e-05	951960	948900	937950	130410	165010	152980
Prdx1	-6.64903	0.00338407	1954700	2671400	3580100	303650	469030	614550
Tpd52	-6.12337	0.00424282	627710	542040	479820	56441	116960	148220
Slc11a1	-5.82514	6.53655e-06	10029000	10066000	9635500	1786100	2177300	1741500
Annexin A5	-5.54509	5.57423e-06	43425	42371	36000	9018.4	8008.1	7402.7
Hsp90ab1	-5.51762	3.94273e-05	765990	761490	679610	129060	154780	162580
Fam73a	-5.28418	0.00290484	320010	536520	229120	83070	55720	79270
Steap4	-5.22635	5.08946e-05	4036000	4255000	4417100	801680	992920	918660
Slc39a1	-4.34558	0.0165107	48163	52116	47142	25691	7619.1	10137
Tfrc	-4.09375	1.83735e-05	339670000	368580000	343210000	87864000	107190000	91517000
Sepsecs	-3.98568	0.00418886	9710500	8160200	5419800	2878700	2316500	1399800
Etfdh	-3.69152	7.23732e-06	99045000	94725000	84320000	28680000	30718000	24565000
Inpp5k	-3.61371	0.0173094	378290	568300	443620	251270	136180	81279
Hyal1	-3.58087	1.40348e-07	936350	941370	818040	288700	289080	258950
Usp32	-3.56004	1.76791e-07	830520	837450	764090	251410	267930	240640
Rfc1	-3.50879	0.0276158	23479	26365	8983.6	5454	8730.6	7092.3
Sdhc	-3.46587	0.000394529	22074000	22622000	21574000	8632500	7469800	5522300
Slc41a3	-3.43017	0.00133142	59840	82208	77990	23098	30014	18870
Slc15a4	-3.37864	0.00187954	127340	143690	93036	51425	40128	29435
Npc1l1	-3.3775	0.00372217	3013200	2762200	2439800	1302800	900630	618170
Adcy3	-3.32941	9.6004e-06	3504400	3232300	2817700	1111400	1105200	968870
Mtnd1	-3.29111	0.000170796	1846000	2009300	1867900	736390	694710	522870
Cdkn2aipnl	-3.28356	0.000404412	341730	283030	241290	83973	108710	99377
Cyp2s1	-3.23201	5.46244e-07	44522000	46136000	39516000	15027000	16144000	13638000
Igfbp2	-3.21934	1.30485e-06	98259	104150	88163	32309	35151	32767
Gipc2	-3.16816	0.00617989	1768400	1533300	1222500	761350	536740	351040
Cd81	-3.15206	0.000999685	2810400	2816300	2860100	1293300	898630	855910
Lyplal1	-3.12664	0.000180528	1735700	1642700	1388300	613730	637150	455760
Fcgr2b;Fcgr2	-3.12128	6.4666e-06	4735500	4413000	4043600	1530200	1700100	1470000
Acp5	-3.08066	3.58188e-06	442320000	446820000	396450000	147080000	165700000	151330000
Coa5	-3.06862	0.00109377	261160	234000	206930	103220	92603	63009
Plxdc1	-3.05729	0.0014358	2358100	2299000	2058800	1072800	810350	618310
Oma1	-3.02703	1.90062e-05	527040	598320	518290	214810	212380	177760
Rtn1	-2.98145	0.00175155	9644200	10641000	9798300	4869900	3859300	2778100
Hexb	-2.97491	3.05815e-06	195180000	185690000	172640000	69056000	74056000	63951000
Gm11639	-2.87705	0.0173149	1357600	940720	557240	452460	357080	254530
Fnbp4	-2.87234	0.00187358	153470	158500	105190	58873	63080	40010
Mmgt1	-2.86874	0.016376	897200	747130	665260	417460	367490	169450
Mettl16	-2.86359	0.000295633	351220	346480	327320	113140	153830	134120
Mtnd3	-2.8417	9.82778e-06	309340	324760	295040	121350	134670	108770
Slc35f6	-2.82762	0.00314581	441030	381580	311490	184230	164820	105080
Tram1	-2.78678	0.00432491	2287700	2589700	2261700	1280300	1012000	657640
Appl2	-2.76571	2.29444e-06	14160000	13637000	12179000	5281700	5580200	5190600
Tgs1	-2.72475	0.00131086	266170	413930	278590	139480	129290	115790
Ndufab1	-2.69898	0.0234329	26228000	26329000	18280000	11931000	13846000	5348700
Sdhb	-2.69176	9.60756e-06	167670000	166590000	152240000	67913000	66137000	66802000
Hexa	-2.68077	5.61443e-06	86000000	81092000	74084000	32770000	34876000	32293000
Ndufs8	-2.67118	1.16189e-05	25154000	23393000	22765000	10091000	10277000	9326800
Fyn	-2.67039	0.0183602	153000	187380	135060	96501	74866	38732
Slc25a26	-2.65219	0.00125829	504650	585710	360280	227530	189760	181940
Hist1h1a	-2.61472	0.00176712	67639000	59255000	49429000	28070000	29047000	18706000
Asrgl1	-2.60384	0.00605837	414730	407010	360090	235980	168970	118830
Tatdn3	-2.60266	0.00221774	47473	65290	53431	19573	25022	26396
Mthfr	-2.59454	0.00395734	382600	391740	351840	210630	173550	113670
Gtf3c5	-2.5704	0.00757122	163370	152600	106850	76932	67825	41369
Ivd	-2.54891	1.24929e-05	61624000	61288000	58963000	26179000	27143000	26044000
Polr1d	-2.54043	0.000812455	3716500	2836300	2822400	1523400	1364700	1201200
Ube2c	-2.53721	0.000628891	628560	566420	429340	253170	255210	199340
Mgst1	-2.49356	0.00641548	4696700	4390300	3973700	2521800	2189200	1317400
Slc16a1	-2.47881	0.000846652	1464500	1375900	1148700	712010	606160	484570
Mien1	-2.46403	0.00412644	753910	612130	449450	317610	281480	213420
Tnfrsf11a	-2.45111	0.0149205	157150	159020	118430	77173	88461	40513
Dse	-2.44451	0.000272647	816120	715740	650600	302350	345660	342580
Nelfb	-2.44315	0.000112876	1305800	1320800	995830	576570	539960	520600
Fcgrt	-2.44298	0.000809109	2324000	2542700	2178600	1255400	1148500	842790
Lrrc58	-2.44025	0.000210796	897810	928600	806520	372010	394920	433480
Ndufv2	-2.43125	0.000154465	16068000	13770000	13068000	6394700	6570000	6590100
Ndufs1	-2.4269	3.45991e-05	111470000	106710000	106990000	49627000	53461000	46182000
Mt-Cyb	-2.41006	0.00820278	1598600	1691800	1256500	875240	819380	465840
Hspa2	-2.40174	0.00281079	1939900	2772600	2576000	1215300	1036800	1092300
Arl11	-2.40128	0.00877638	1254000	1046400	798440	552480	575380	327570
Glce	-2.39326	7.74962e-05	3789300	3457200	2948000	1651100	1663200	1411900
Ndufs4	-2.38111	0.000146402	4800600	4397900	4484900	2247300	2303200	1864800
Rwdd2a	-2.37991	0.00101699	626820	495910	468940	279520	252880	210530
Krit1	-2.37824	4.60475e-05	134300	132660	127730	62359	68275	54683
Fkbp9	-2.36759	2.03462e-05	4741400	4443300	4200400	2057100	2279400	1957000
Lrrc8a	-2.36345	0.0023736	1120700	1015100	859720	576840	488850	361550
Uqcrfs1	-2.36285	2.81538e-05	25130000	24985000	22860000	12423000	11328000	10640000
Phpt1	-2.35408	0.00111198	2324800	1935500	1587800	994340	988020	767190
B3galt6	-2.35173	0.00327364	800840	722050	666480	451300	321500	281040
Slc30a7	-2.35146	4.40707e-05	1904000	1810700	1736600	818870	947360	816830
Dnase2;Dnase2a	-2.34525	0.00212708	3704900	3538300	3443500	2131700	1488000	1518200
Myh14	-2.34146	0.00448618	21227000	21321000	19913000	13338000	9331700	7762500
Eed	-2.31964	0.00968729	360500	345260	323250	219660	181640	111180
Tgoln1;Tgoln2	-2.31609	0.00236395	2883100	3065100	2413300	1683300	1337700	1049100
Dscc1;DSCC1	-2.30737	0.000657786	65731	85658	71226	33084	40746	33327
Gtf2a2	-2.30368	0.00187247	989360	1063400	844970	582790	456430	376190
Znf512	-2.29836	0.00387118	238620	192390	162140	111460	103930	72840
Ndufs7	-2.29488	0.000754797	21114000	18020000	16617000	9666200	10093000	7379300
Asah1	-2.29297	6.98239e-06	84964000	84269000	76628000	41999000	41054000	36322000
Tmem9b	-2.28923	0.0103424	3722600	2970900	2147900	1657300	1603700	1025300
Cfap20	-2.28617	0.00557516	2244400	2042200	1414200	1134000	904260	728060
Mettl14	-2.28498	0.00206938	284920	319150	301990	182730	144170	120240
Wdr13	-2.28459	0.00476491	328820	292940	231680	167390	151200	101760
Anks1;Anks1a	-2.28159	0.00203253	1277100	1340100	1067800	751060	580880	485330
Mt3	-2.27963	0.000222293	24948000	23098000	19349000	10339000	11082000	11305000
Arl5a	-2.27897	0.000611458	844780	738030	627090	392810	383650	301630
Pqlc3	-2.27786	0.00267559	4205800	4094400	3641000	2366800	2118400	1456000
Slc6a11	-2.27058	0.00654774	2285600	2010800	1727700	1197800	1127100	691390
Ndufa12	-2.25283	0.000565295	10109000	9223400	9769200	4513400	5607400	4331900
Msmo1	-2.23406	0.0013277	6654000	6880100	5830000	3911500	3242900	2597000
Nyap2	-2.21494	0.00772478	218930	197150	129020	91845	77385	99223
Clasp2	-2.21306	0.00106103	394030	472290	331770	209450	228050	164110
Gls	-2.21067	0.00348825	941130	951700	758970	526510	501470	327950
Dolpp1	-2.19595	0.0121101	542880	606710	454220	367230	283040	187050
Klhl11	-2.19417	0.0279307	176830	175340	116750	110180	85995	49773
Map2k5	-2.19345	0.0010914	4346800	3723900	3177100	2156200	1932600	1609400
Lilrb3	-2.17683	0.000629076	3458600	3085700	2679200	1740500	1669500	1312900
Ube2s	-2.1755	0.00653269	338580	255510	225000	148900	116280	150260
Atp5sl	-2.17398	0.00394946	79000	71374	48794	38472	31502	30406
Kbtbd11	-2.17323	4.41144e-06	17474000	18437000	16579000	8882300	9668700	8339100
BC048403	-2.1724	0.00301246	105720	85687	100230	53298	44318	51601
Mlec	-2.14515	0.000493983	43685000	42349000	36195000	23829000	22337000	17538000
Pcm1	-2.14513	0.00448351	1372100	1272400	1014000	747670	702080	470180
Ptcd1	-2.13375	0.01029	580670	380010	328630	230360	200600	222310
Eef1e1	-2.13312	0.00220602	17994000	17641000	14679000	10640000	8959800	6930100
Smad4	-2.13236	0.000175982	3649700	3433600	3274500	1690600	1856100	1856000
Tmem167;Tmem167a	-2.13224	0.00749078	2109200	2066100	1792800	1395600	1011700	785560
Apobec1	-2.13094	1.74416e-05	3894600	3873900	3491600	2072800	1940600	1862600
Abl2	-2.12858	0.00491961	4810700	3270000	3022600	1846400	2101100	1749000
Rbm8a	-2.12214	0.0136184	3088500	2543300	1894300	1482000	1568700	921650
Dgka	-2.12192	0.00220802	326630	344020	298220	202890	181490	131080
Dnajc5	-2.11425	0.00347879	9936800	9696200	8448100	5966900	5354000	3710000
Ndufa5	-2.10547	0.000292659	21428000	18779000	18258000	11072000	9978600	9804600
Calcr	-2.09893	0.000649245	3552600	2966700	3286000	1723900	1839500	1625300
Zfp947	-2.09827	0.00013385	170280	156130	129330	82140	84076	74166
Apoo	-2.094	0.00446244	6114300	6448000	5608600	3989000	3458200	2402500
Apob	-2.09245	0.0128896	772230	629560	583030	372110	465300	245920
S100a10	-2.08723	0.00273632	336960000	278730000	237770000	174980000	155630000	124110000
Hebp1	-2.08247	0.000698828	67251000	65382000	65914000	35531000	33142000	37507000
Lsg1	-2.07637	0.00310418	1879100	1747800	1386100	1076100	909960	714690
Ndufa6	-2.07518	9.27717e-05	31387000	30999000	30964000	16800000	16833000	16406000
Uqcr10	-2.07378	0.00399031	28791000	29112000	24516000	17834000	16107000	11038000
Mboat7	-2.06611	0.00180236	462400	450270	486640	293850	248960	216100
Ipo11	-2.06065	0.00610071	4867400	6200800	3542000	2891800	2669500	2177900
Gtf2h4	-2.05624	0.000596243	357660	383940	310690	219660	187650	163830
Ctsk	-2.04857	0.000121016	1214800000	1148000000	1062300000	634080000	689050000	542780000
Cav2	-2.04713	0.0144033	834120	835850	673410	539180	487140	286740
Paip1	-2.03059	0.00153676	8681300	7555700	6819400	4716000	4554600	3422800
Surf2	-2.02641	0.00179107	3431100	3782700	3454600	1720800	2415300	1784100
Tpp1	-2.02508	6.19188e-05	39818000	38659000	33728000	22170000	20988000	18489000
Adam15	-2.02204	0.0011167	904160	816130	743260	452700	415350	485520
Steap3	-2.0128	5.56091e-06	25642000	26544000	23132000	14340000	14774000	12542000
Gemin4	-2.00789	0.00294593	666820	578710	463670	367760	305660	270590
Scpep1	-2.00729	0.000101249	38219000	38998000	33986000	22680000	20445000	18588000
Lamp1	-2.00532	0.000640703	66680000	71815000	65785000	43618000	36584000	33693000
Srrm1	-2.00473	0.000115921	11798000	11749000	9858800	6682800	6449500	5415500
Fdft1	-2.0036	2.32642e-05	432390	432490	361080	238840	233080	207540
Ndufa1	-1.99545	0.00205881	1680200	1417500	1637400	921790	971100	754570
Xrcc6	-1.99425	0.00708881	828630	766080	649110	498210	470900	304750
Atp6v1c1	-1.99378	0.000334629	442810000	413900000	371870000	248790000	244080000	194880000
Ftl1	-1.99299	0.000113771	87001000	79885000	76003000	48288000	46210000	41153000
Aldh7a1	-1.98826	8.76746e-05	11490000	11579000	10876000	6011800	7046700	5980200
Pcbp2	-1.98614	0.00475311	216920	291500	249650	165200	146440	114610
Fth1	-1.97491	0.00819505	159700000	137390000	132910000	92863000	95434000	58792000
Pigl	-1.97391	0.0125056	176130	175630	100880	92065	76784	78992
Serhl	-1.9736	0.000798476	3004800	3240500	2812300	1814600	1943900	1389700
Med11	-1.96404	0.012635	276810	260610	201730	165050	163400	98015
Eif3m	-1.96209	0.00261435	63057000	65884000	55771000	41330000	37348000	27347000
Plbd2	-1.96154	6.04177e-05	22695000	21886000	19607000	12974000	12619000	10847000
Slirp	-1.95959	0.00266316	22403000	21331000	18049000	14058000	10464000	10723000
Dapk1	-1.95438	0.0232222	36490000	27617000	21774000	19419000	18211000	11439000
Arsb	-1.95394	0.000202073	28793000	28521000	25184000	16463000	17321000	13379000
Chst12	-1.95373	0.0104783	359310	331990	267210	222490	201340	131310
Pcdhga8;Pcdhga1;Pcdhga10;Pcdhga5	-1.95317	0.00841804	2901400	2233300	1886400	1590200	1284600	1105100
Trrap	-1.94397	0.00567195	2694900	2446000	2230000	1763900	1222300	1277200
Cab39	-1.94148	0.0053493	71752000	68081000	61278000	46133000	42178000	28929000
Igsf8	-1.94071	2.54098e-05	1560500	1555700	1478700	875020	946750	815850
Kdelc1	-1.93926	0.00920737	1556500	1491800	1347600	1095000	848920	635210
Lyrm5	-1.93205	0.00618673	10436000	10377000	9104600	7155600	6042900	4351300
Gng2	-1.92666	0.000792907	10107000	9071300	8357300	6006200	5161200	4756500
Naa16	-1.91954	0.00398622	1232200	1201900	1033400	813530	697900	524500
Narfl	-1.91843	0.000120985	3081400	3046500	2795100	1795300	1661800	1714300
Med10	-1.91234	0.000318933	474510	431270	369970	259010	263700	218120
Hmgcs1	-1.91135	5.48793e-05	33805000	31464000	29361000	18425000	19814000	16859000
Clcn4-2;Clcn4	-1.90565	0.00881414	153490	146990	110280	96223	66407	77434
Ca2	-1.90494	0.000605438	71435000	73622000	68201000	44804000	46021000	34630000
Fam198b	-1.90352	0.000215142	804160	783390	720210	428830	453450	465570
Tle4;Tle1	-1.89724	0.0174974	3017300	3307500	2214100	1284200	1758600	1971600
Pign	-1.89258	0.0104989	370100	380670	279110	256190	170600	182660
Tnfrsf1a	-1.8865	0.0111491	326840	302240	261440	222530	143110	166220
Ccr1	-1.8802	0.00036737	9179800	9977800	8296100	5801400	5063900	5355300
Traf2	-1.87887	0.006495	2182700	1636700	1386900	1050800	1123200	871010
Gtf2h2	-1.87353	0.00269679	766090	758570	571790	437240	474980	334820
Cisd3	-1.8714	0.000181392	615930	649830	618450	390880	402050	330740
Cat	-1.87132	3.95918e-05	261870000	260570000	242060000	145590000	163480000	145740000
Tmem97	-1.87004	0.00100867	583260	609430	475180	373340	340180	279870
Nrp2	-1.86784	8.36269e-05	31891000	30397000	25383000	17636000	18461000	15960000
Gnpat	-1.86367	0.00035687	918840	806990	745840	510730	484180	475490
Lin7c	-1.86213	0.00308208	2428600	2346300	1974600	1532300	1482200	1055900
Dad1	-1.86019	0.00328303	2522600	2649800	2266800	1786000	1528000	1187100
Banf1	-1.85939	0.00571025	31686000	25647000	23451000	16764000	19016000	12797000
Ptrhd1	-1.85388	0.0026061	7573000	7447400	6568700	5225100	4048900	3782200
Timm21	-1.84938	0.0159617	442200	385860	489260	265250	228300	299910
Itga2	-1.84639	8.39004e-06	14576000	14577000	13551000	8559500	9112600	8070500
Rap1a	-1.84194	0.00663089	35047000	30058000	25710000	20043000	21113000	14094000
Lnp	-1.84039	0.00106976	2987300	2898000	2616000	1981500	1714700	1471500
Morc3	-1.83805	0.0138129	328640	271260	187170	174200	160880	131940
Me1	-1.83769	0.000215607	45039000	42511000	37965000	25752000	28137000	22246000
Nop58	-1.83465	0.000811341	56208000	53995000	47257000	36132000	30214000	29277000
Ndufa11	-1.82573	0.00688525	1701000	1879100	1892700	1339600	981690	1040300
Ttyh3	-1.82401	0.00163611	462040	459710	370680	265900	240550	279160
Fech	-1.82383	8.52351e-06	12142000	12540000	11336000	7182800	7859600	6935300
Nbeal1	-1.8224	0.00238321	2186400	1934000	1722800	1354400	1243300	983650
Prkag1	-1.82213	0.0118427	5973000	6316500	5304600	4475000	3882300	2620400
Gbp5	-1.82167	0.000690931	686760	624700	629400	426070	380200	379450
Aar2	-1.8192	0.000101017	410900	440710	369170	233470	271420	241140
Lmna	-1.81816	0.00147571	1656000000	1621000000	1297700000	1016100000	1019400000	770050000
Ndufs2	-1.81708	7.73399e-05	57857000	55701000	54201000	35591000	35584000	31636000
Ndufa10	-1.81679	2.68424e-05	58330000	57280000	54709000	35111000	36662000	32587000
Polr2j	-1.81581	0.0146042	1726600	1641600	1443900	1184900	1135100	699420
Secisbp2	-1.81118	0.0253764	3508000	3146700	3274000	2641000	1569400	2019600
Map1lc3a;Map1lc3b	-1.80922	0.00189098	2709200	2399000	2206900	1651400	1631500	1237100
B2m	-1.8063	0.00622348	13767000	12198000	11712000	8278200	6604000	8400600
Hpcal1;Hpca	-1.79618	0.0028204	54174000	51804000	43348000	34276000	34226000	24628000
Sdf4	-1.79384	0.00687969	4533800	3696500	2831900	2401500	2397100	1965500
Tsku	-1.79331	0.00743715	1072200	953300	817450	715320	595710	467890
Uxt	-1.79295	0.00167517	618510	645730	509290	423680	366650	312630
Ube2e2	-1.79268	0.00170217	4121900	3864100	3496200	2574800	2665700	1938100
Cpt1a	-1.79203	0.000121443	13748000	14883000	12962000	9332200	8770600	7748900
Mrps15	-1.78999	0.000152593	11812000	11530000	9760200	7189600	7336400	6047000
Nit1	-1.78935	0.0144407	595740	443840	356300	300880	259960	289320
Ccdc109b	-1.78692	0.000238254	4946000	5037500	4498800	3305100	3099200	2639300
Mrps9	-1.7868	0.00130302	14225000	13551000	11709000	9207500	8637000	6846600
Ndufv1	-1.78658	0.000253952	35394000	33106000	33864000	21365000	22255000	20139000
Fbxo11	-1.78372	6.65378e-05	182550	201410	167500	118730	113080	111230
Aga	-1.7819	0.000308765	3473200	3477700	3324600	2305000	2070100	2046900
Gstk1	-1.77529	0.0129615	5363100	4147200	3143700	2714800	2845600	2226100
Itgb5	-1.77176	0.00964209	16732000	15039000	13302000	11537000	9898900	7251800
Prdx3	-1.77165	0.00437465	100070000	100170000	89301000	69821000	67155000	47248000
Pmf1	-1.76989	0.000780275	526410	531490	407940	314610	338340	266150
Ubl3	-1.76838	0.0010483	84702	82073	85387	50757	60037	48473
Naglu	-1.76819	4.28572e-05	60869000	60962000	56828000	39268000	39260000	34050000
Nrm	-1.76735	0.00144636	542420	648160	596880	407530	365070	351640
Atp6ap1	-1.76524	0.0229625	38369000	34684000	33451000	27360000	26080000	15608000
Bpnt1	-1.76414	7.80736e-05	78967000	82812000	76866000	48474000	54431000	47748000
Creg1	-1.76356	0.00203358	4693300	5098400	4724200	3475700	3225200	2530100
Rpl35	-1.75676	0.0095302	36272000	35011000	28279000	23475000	24656000	15749000
Stk16	-1.75668	0.0110827	360920	312560	259480	241110	196110	157160
Arl15	-1.75539	0.0128334	217820	175110	128510	110550	121120	93138
Maged2	-1.7551	0.00150349	384040	365000	354200	264420	241840	197630
Pcyox1l	-1.75365	0.0080237	314980	321970	209160	183460	198560	148590
Smn1	-1.75024	0.00110505	652510	571120	594370	372890	392610	388320
Idi1	-1.74915	0.000912455	33104000	32508000	27675000	22253000	20299000	16955000
Clp1	-1.74796	0.00386822	683940	728230	595570	510320	427970	349970
S100a13	-1.74777	0.00282817	29878000	25599000	22989000	18969000	16257000	14697000
Spcs3	-1.74661	0.0168222	15127000	13605000	13423000	11477000	9209700	6749900
Sash3	-1.74405	0.00691131	813170	738740	659930	488400	573900	366920
Igf1r;Insr	-1.74174	0.000305516	179880	193570	150810	109880	110760	112380
Cln5	-1.74096	0.000771588	5030300	4864300	4705100	3433600	2968400	2945900
Mitd1	-1.74057	0.0226555	24636	15832	18418	10960	13360	12804
Sun1	-1.73907	0.000740055	4225100	4111600	3701600	2900000	2568400	2259000
Tm7sf3	-1.73883	0.00533484	46333	42864	52319	29737	31383	29145
C1qbp	-1.73577	0.00888142	36705000	32885000	24948000	20918000	23535000	16096000
Leprot	-1.73544	0.00814716	987130	1045600	1010900	781340	692950	507410
Pigu	-1.7323	0.00209431	1106600	1176400	1039900	814390	752500	584770
Ncapg2	-1.73047	0.00333536	79899	93835	61194	49102	54721	45346
Ndufa2	-1.73009	0.000718995	17503000	16861000	16950000	10528000	11212000	11262000
Ndufb6	-1.72974	0.00507125	17899000	16245000	15672000	11736000	12256000	8424700
Slc37a2	-1.72895	0.0135812	27217000	27115000	23592000	21618000	14448000	14843000
Tspan4	-1.72873	0.0286205	60892	70679	54163	29402	45507	46409
Dnase1l1	-1.72857	0.00712671	1946500	2115400	1777400	1553100	1237400	1014700
Ephx1	-1.72777	5.02272e-05	65694000	67096000	63940000	43337000	43860000	39563000
Dnajb1	-1.72652	0.00406597	26062000	24347000	20758000	18082000	15297000	12733000
Thumpd1	-1.72548	0.00193983	10555000	10374000	8292200	7079400	6483300	5299400
Gm20390;Nme2	-1.72525	0.000777682	728990000	703960000	603530000	487170000	449480000	379050000
Lsm2	-1.72407	0.00490628	4696100	4964200	3988900	3528500	2648600	2672000
Sumo3	-1.72169	0.00544815	13355000	13098000	10609000	9189000	8662100	6287000
Rasal2	-1.72026	9.50075e-05	5747600	5539500	4668200	3580800	3529000	3179400
Cd68	-1.71994	0.00159265	21583000	21094000	18270000	14487000	14337000	10832000
Dnajb6	-1.71642	0.00939361	1992700	2188600	1892700	1499300	1518000	987050
Trim23	-1.71607	0.0173791	9340500	8744400	8184000	6738400	6587700	4100700
Sf3b4	-1.71556	0.0276476	9764200	10014000	8405300	7978800	6513700	4310300
Cd37	-1.71354	0.00255224	926880	924740	820400	669620	604160	475430
Crlf2	-1.71298	6.72269e-05	529830	510710	474660	336600	328290	318220
Npc2	-1.71176	0.00225162	71571000	70799000	66778000	53055000	44386000	39426000
Csnk1d;Csnk1e	-1.70902	0.000650097	4365700	4517400	3902600	3128400	2715600	2497800
Fn1	-1.70774	0.00174018	4619500	3968200	3657300	2589500	3032200	2359300
Utp6	-1.70763	0.0258294	177790	204560	127710	137290	109900	85078
Klhdc4	-1.70592	0.00088569	419630	451440	372680	276130	253320	279800
Lgals1	-1.70283	0.0277652	421960000	385350000	307470000	257090000	313300000	173000000
Bzw2	-1.70252	0.000761849	19173000	18324000	15049000	12191000	12191000	9920800
Mrps21	-1.70187	0.00022782	338810	358270	322670	223440	217520	224990
Aph1a	-1.70025	0.0254626	171730	156880	129820	121860	78394	102510
Zfp292	-1.69957	0.0231699	3568300	3183100	2513000	2599600	1957100	1572700
Phldb1	-1.69613	5.97384e-05	2965600	2860000	2653400	1877900	1868500	1808900
Sidt2	-1.69422	0.0107738	699910	609170	474640	458740	383130	325840
Blmh	-1.69302	0.00235141	72790000	68748000	58623000	48452000	47557000	36104000
Ube2i	-1.69212	0.002873	25662000	23991000	20191000	17130000	16335000	12618000
Ctsz	-1.69173	0.000382864	136500000	134260000	133570000	94446000	91327000	80666000
Mfap1a	-1.6904	0.0153428	109660	147090	86263	83347	71745	66296
Tlr3	-1.69035	0.00521682	747290	658030	549800	479920	387930	413760
Hmgcr	-1.68982	0.00134056	1258800	1188600	982410	829780	776760	650410
Galnt10	-1.68899	0.0172423	29997	34482	42039	23427	24246	21865
Nudcd1	-1.68865	0.00292643	9019200	8886400	7723600	6119300	6380300	4531400
Mfsd1	-1.687	0.0052303	357640	319450	362190	257030	221250	208560
Mpdu1	-1.68605	0.00280027	6899800	6741600	5845100	4825800	4645400	3482300
Galnt6	-1.68595	0.00356041	4384200	4017400	3574100	2824100	3002600	2131800
Tmem65	-1.68532	0.0137721	6574400	5951400	5546100	3890900	3435400	4667100
Map3k4	-1.68505	0.00139256	757720	754280	736370	463190	577590	452470
Smpd2	-1.68493	0.00704672	2653200	2838600	2186500	1987000	1787000	1334200
Abracl	-1.68441	0.0151789	47065000	44827000	42193000	37184000	30585000	22541000
Ssb	-1.68409	0.00280143	126600000	121480000	97652000	83914000	81911000	62950000
Cnot7	-1.68149	0.0183017	1833800	2174800	1267500	1231400	1264100	940070
Uqcrb	-1.67848	0.0162563	124970000	110250000	102370000	86794000	61049000	77466000
Ophn1	-1.67394	0.000776942	509570	464880	480130	321330	351660	295320
Armh3	-1.67222	0.00265739	3865700	3959300	3145500	2701500	2626900	1996600
Vps35	-1.67219	0.000702636	180970000	184820000	154770000	128720000	117240000	100960000
Rab35	-1.67112	0.00557645	26513000	25216000	23109000	19166000	18056000	13165000
Flvcr1;Mfsd7b	-1.66884	0.00310486	572600	551410	469150	414560	340000	311190
Ap1s1	-1.66854	0.000799003	13554000	12153000	11265000	8698000	8791500	7188600
Sri	-1.66813	0.0061051	54396000	54060000	50324000	39983000	30560000	35907000
Arf6	-1.66665	0.00434302	29779000	30972000	26350000	22353000	20844000	15506000
Scin	-1.66616	0.000188579	129910000	129380000	113910000	79653000	93103000	76807000
Polr2h	-1.665	0.00123845	2161700	2126800	1688500	1469000	1307300	1205200
Tspan14	-1.66474	0.000363248	2199800	2125900	1879100	1511400	1399700	1239000
Cyp51a1	-1.66251	0.000174394	9567900	9428700	8298800	6312800	6623500	5362500
Lpcat1	-1.66051	0.000340841	14246000	14155000	12073000	9773900	9442600	7929100
Arpc5l	-1.6562	0.000553837	9228300	8898000	8510300	6547200	5943800	5439500
Smg1	-1.65444	0.0129856	8795900	9281500	8725900	7198000	5052500	5952700
Get4	-1.65077	0.00170499	4899200	4506200	3771100	3274900	2926400	2657700
Adi1	-1.64961	0.00049892	6779700	6233400	5409600	4389400	4118500	3877000
Wdr82	-1.64901	0.00521012	3872400	3910800	3498700	3013200	2613800	2064700
Rdh12	-1.64701	0.0059229	1061100	964280	920570	792330	650590	562850
Myo7a	-1.64486	0.0109769	185720	210330	175510	157230	133270	101180
Cenpv	-1.64289	0.00213634	1194500	1135300	961180	837090	698820	691510
Bet1l	-1.6422	0.0175046	102080	102250	71525	74125	54194	57747
Haus1	-1.63947	0.00750868	556870	538780	406030	386340	305930	321870
Entpd6	-1.63695	0.00404427	1213500	1042400	973230	831390	738890	628730
Brk1	-1.63677	0.00085139	23124000	21768000	19835000	15809000	15713000	12614000
Mtnd5	-1.63599	0.00171053	4275500	4227100	4249400	3128500	3112500	2478800
Manba	-1.63591	1.69974e-05	9509300	9577400	8917200	6405600	6591500	6046300
Cers2	-1.63536	0.00400245	4118200	3941500	3397900	2986800	2725200	2132100
Tor4a	-1.63276	0.000323033	14353000	13591000	12566000	9902000	9132700	8569300
Adap2	-1.63272	0.00231875	328780	399960	316050	251690	221780	235420
Chchd1	-1.63271	0.000261517	2196400	2001500	1776200	1342800	1425500	1289900
Rab24	-1.6325	0.00095743	3543100	3153500	2873200	2341800	2223200	1950400
Rchy1	-1.6311	0.00285916	1147300	1071700	872710	747410	772910	589060
Gm561	-1.63059	0.0105789	233770	237220	192620	183090	155350	119210
Ocstamp	-1.63002	0.00256928	461200	484810	467100	286770	356970	324200
Fam45a	-1.62929	0.00767236	5832500	5939800	4915500	4377900	4168600	2969100
Mfsd5	-1.6292	0.00752731	240600	286600	240920	204860	156110	165320
9030624J02Rik	-1.62901	0.000835236	36237000	38359000	33733000	27611000	24995000	21631000
Tgfbr2	-1.62887	0.00120418	2124700	1909100	1869900	1438700	1429700	1174200
Prmt1	-1.62861	0.00548714	96450000	96950000	77531000	71835000	63761000	50427000
Pex11b	-1.62625	0.00161524	3324500	3444500	2933000	2507900	2275800	1882900
Adgre5;Cd97	-1.62557	0.00104403	9370300	8551300	8266600	6198400	5745100	5959500
Apom	-1.62463	0.00523505	1861600	1954700	2108800	1256300	1421000	1379500
Saal1	-1.62389	0.00930073	990360	971860	703660	681120	646260	494460
Nsun5	-1.62356	0.00843324	372260	332240	308470	276930	232960	190180
Sgsh	-1.62284	0.000464496	4095200	4096800	3691300	2538200	2836200	2770100
Cox7c	-1.62278	0.0166202	3725900	3475800	3342600	2983200	2515400	1857700
G6pc3	-1.62261	0.00196968	902410	913120	809360	592640	709620	510810
Herpud2	-1.62201	0.00936131	599820	581710	541820	426150	468600	305310
Etf1	-1.62072	0.00629499	83990000	76731000	63734000	58619000	53871000	42047000
Elapor2	-1.62002	7.7314e-05	337570	339180	279000	225420	221340	207230
Ndufs5	-1.61821	0.00026182	15192000	14099000	13847000	9963300	10178000	9499000
Ncstn	-1.61759	0.00315384	20388000	18835000	16311000	14043000	13731000	10561000
Gusb	-1.6141	3.75652e-06	138710000	139920000	120960000	90969000	97121000	86959000
Msr1	-1.61377	0.0004988	178380000	170220000	136870000	112810000	114310000	105530000
Tmem19	-1.61377	0.0259893	1651500	1469000	1434900	1293400	1139900	773130
Hm13;H13	-1.61286	0.00798138	13691000	12680000	12448000	10451000	9449800	7177400
Tex10	-1.61191	0.000831133	1749600	1950100	1685600	1374000	1231600	1116700
Gstm5	-1.6119	0.00103643	1406200	1525600	1441300	1103000	1018100	904730
Rab5c	-1.60999	0.00015752	58637000	59335000	49904000	40076000	41650000	34304000
Ndufs3	-1.6087	0.00056504	25280000	24810000	25068000	16918000	18613000	16504000
Mtnd4	-1.60845	0.00595444	2308100	2107800	2278100	1695300	1678100	1288400
Slc33a1	-1.60778	0.00452949	2327300	2312000	1946200	1782300	1406000	1383700
Epn3	-1.60761	0.0107659	314780	363850	275780	267850	203080	192350
Plxnd1	-1.60726	2.30849e-07	15061000	15657000	13831000	10373000	10777000	9670000
Prex1	-1.60567	8.50525e-06	35608000	35786000	32489000	24627000	25150000	22220000
Lig1	-1.60425	0.00032723	952690	1028900	836040	653680	638640	654300
Tcf25	-1.60291	0.000237328	1730800	1689900	1447500	1200200	1167500	1009600
Whsc1	-1.60177	0.000461333	263960	248120	214300	177230	177290	149590
Pea15;Pea15a	-1.60032	0.0173989	54368000	51371000	40560000	37579000	39451000	25660000
Entpd7	-1.59949	1.80899e-05	403730	391430	356860	270370	276800	253420
Pls1	-1.59807	0.00670395	140800	153030	136680	85801	120050	96411
Pds5b	-1.59783	0.00794926	4904100	4439100	3612200	3323200	3280800	2433100
Sgpp1	-1.59749	0.00112006	229260	276570	244370	170950	182120	168000
Ephx2	-1.59607	0.000240548	3752800	3599900	3447500	2658600	2551600	2323700
Purb	-1.59558	0.000662845	11076000	11775000	10038000	8414300	7909300	6664200
Xxylt1	-1.59541	0.00045614	556940	581050	485740	411160	390400	331870
Ssna1	-1.59523	0.000582491	1731900	1770200	1434100	1200600	1103700	1124800
Trabd	-1.59372	0.000178394	6089600	6854900	5785500	4551100	4335600	4161000
Ppic	-1.59319	0.000463762	2650600	2569000	2361300	1765700	1729500	1791800
Kank2	-1.59227	7.08715e-06	1011600	1069000	943480	702920	751880	658070
Bloc1s1	-1.59042	0.00227962	2537800	2554200	2328800	1990600	1666200	1556900
S100a6	-1.5877	0.0170132	548290000	532990000	411280000	371800000	416860000	266640000
Nudt21	-1.58762	0.000794395	8634400	8634500	7531300	6443700	5842500	5129400
Gpr180	-1.58733	0.00697386	387720	370070	339170	224230	263410	283500
2210016F16Rik	-1.58721	0.0001474	33000000	32029000	29178000	23436000	22537000	20097000
Tceb2	-1.58624	0.0131354	72181000	59985000	50204000	47677000	45255000	34737000
Cnih4	-1.58544	0.00522762	5543100	6128000	5259100	4676100	3948600	3341200
Cpsf7	-1.58418	0.00151345	10797000	10173000	8660600	7689000	6865300	6237400
Erh	-1.58385	0.00213789	48095000	45777000	38686000	34705000	29623000	28695000
Commd4	-1.58322	0.00103868	4473900	4593700	4105600	3462400	3102600	2723800
Ppcdc	-1.5832	8.04833e-05	3346200	3380200	3188900	2312100	2395700	2258200
Tmx4	-1.58276	0.00713993	4902000	5192900	4157200	3860900	3555300	2675700
Itch	-1.58243	0.000111625	8480400	9035900	7807700	6320900	6144500	5349900
Zfpl1	-1.58178	0.000951621	7637500	6899400	5924100	5028300	4805100	4492700
Grin2d	-1.5808	0.0142368	7758600	7578400	6378700	6113400	5410600	3950200
Dstn	-1.57936	0.000905249	200170000	199700000	174290000	148740000	140110000	116790000
Ikbkap	-1.57901	0.000227773	18715000	18981000	16541000	13043000	14018000	11234000
Ddx39b	-1.578	0.00479679	102720000	94443000	75745000	69477000	68701000	53913000
Fbll1	-1.57737	0.000257211	1022700	1032000	879370	741330	679260	646300
Ythdc2	-1.57651	0.000290439	1213400	1326600	1028300	852780	896430	760460
Dap3	-1.57557	0.00107376	12830000	13213000	11384000	9754900	9190800	7573900
Efr3a	-1.57459	0.00671497	626420	702840	516170	477840	475340	352700
C1qc	-1.57387	0.00125333	1224900	1374200	1230900	976670	865670	865060
Lmnb1	-1.57193	0.000624144	89032000	88011000	74667000	62455000	64462000	51490000
Tor1a	-1.57179	0.000809886	8005400	8390000	7080000	6134700	5649800	4862000
Arf4	-1.57089	0.00332804	28253000	25952000	23952000	19848000	20492000	15328000
Urb2	-1.57043	0.0114308	136160	131480	95549	90431	77069	87210
Lrch3	-1.56987	0.00549628	889210	870830	885680	568160	638790	672140
Elp4	-1.56951	0.00204344	833150	797570	678080	607050	517950	510100
Mgat2	-1.56912	0.000979883	5039600	4812300	4051600	3367600	3626300	2866300
Mical2	-1.56703	0.00192051	740480	790620	690700	596850	532790	454760
Anapc5	-1.56647	0.00189141	11190000	10301000	8444100	7478600	7467900	6239500
Pycard	-1.56587	0.00758579	17588000	17570000	13398000	13069000	12021000	9446000
Cdk7	-1.56536	0.00298473	946600	902090	749930	652370	683700	515120
Rpl11	-1.56296	0.00239765	184490000	170740000	139610000	125110000	124430000	101820000
Tyw1	-1.56294	0.00295827	537910	502430	400040	366040	327760	324840
Sigmar1	-1.56131	0.00017804	2698000	2575100	2254300	1879000	1835400	1642100
Rab3a	-1.5591	0.0263602	589850	538220	460090	438980	432600	279300
Setd1a	-1.55875	0.0137337	558970	416030	415590	325690	319390	337590
Psmb7	-1.55775	0.0018046	71763000	67309000	56411000	49973000	49399000	40185000
Rplp0	-1.55684	0.00098001	440640000	410880000	361500000	308000000	306970000	252450000
Hist1h1b	-1.55661	0.00232099	177260000	169690000	140070000	116060000	132390000	100050000
Cblb	-1.55643	4.17785e-05	3938900	4183600	3657300	2756800	3049700	2616400
Adck5	-1.55446	0.00695067	281300	262480	255970	225410	186020	165140
Ppt1	-1.55415	1.62934e-05	15486000	15530000	14228000	11070000	11069000	10238000
Fam134a	-1.554	0.0255943	1703100	1679100	1441300	1375800	1293800	849110
Daxx	-1.55368	0.0027216	198540	192970	207180	148150	142480	137980
Ncapg	-1.55328	0.000731403	2691500	2675700	2217200	1973700	1825800	1627200
Ctsa	-1.55311	0.00197565	105780000	113550000	109550000	86698000	77853000	71615000
Riok3	-1.55242	0.000479055	11021000	11634000	9072000	7535800	8273400	6862700
Pla2g15	-1.55191	3.53252e-05	7982500	8140800	7426300	5566300	5812200	5492000
Msh6	-1.55161	3.95764e-05	1923500	1978700	1722400	1393300	1341800	1291800
Snrpd2	-1.55092	0.0127192	38524000	35399000	29984000	26650000	29045000	19488000
Apoa1bp	-1.55085	0.000842151	23029000	21798000	19645000	14876000	17465000	14004000
App	-1.55039	0.0139248	5513600	4926400	4119300	3841100	3926300	2739800
Rpn2	-1.55008	0.0118753	108100000	109930000	94744000	87796000	81050000	58462000
Dpp8	-1.5499	0.0012859	3767000	3405600	2979500	2471200	2655500	2153000
Cmc2	-1.54958	0.0145228	4179100	4074800	3223000	3299000	2452100	2509500
Atl2	-1.54957	0.0094966	3374100	3577100	2882200	2730600	2519800	1870000
Leo1	-1.54886	0.00892485	304580	319640	223780	213360	224530	168440
Gm8024	-1.54819	0.00712757	1862800	1598100	1308000	1240700	1106700	1051600
Ddhd1	-1.548	0.00150455	2535700	2191200	2153900	1687500	1759700	1495200
Lipa	-1.54662	0.000535261	50777000	53021000	49459000	39420000	38488000	32648000
Ppp1ca	-1.54658	0.000156396	154540000	149350000	137360000	111410000	106170000	99709000
Stard3	-1.54643	0.000359226	7612600	7640500	6615000	5636200	5485000	4631300
Atpif1	-1.54568	0.00830218	119770000	114690000	98467000	86043000	70259000	83380000
Msra	-1.54542	0.00183272	8450600	8260000	6748100	6206200	5746400	4924200
Eri3	-1.54484	0.00197347	6651700	7044100	6267100	5373300	4979200	4097000
Tbc1d24	-1.54393	0.0067278	2700700	2508800	2211100	2034600	1888200	1458200
Sub1	-1.54262	0.000163689	8944900	8713600	7528600	5979700	6148900	5982800
Ncaph2	-1.54238	0.00645359	84374	87076	71272	55616	54814	64420
Atp6v0c	-1.54126	0.00982587	7813400	8891000	8977500	7036700	6121900	5441700
Gm10260;Rps18	-1.54023	0.000155316	267760000	258560000	218490000	184240000	186720000	165610000
Cdc16	-1.53919	0.000450791	9965100	10136000	8740500	7597200	6966300	6295800
Myo1b	-1.53849	0.000165854	194300000	193830000	170520000	139320000	145410000	119800000
Rab29	-1.53774	0.00117237	607130	696940	602460	490180	443970	443320
Cyp4v2	-1.53682	0.000208581	15575000	14845000	14124000	10532000	11257000	10443000
Ywhah	-1.53636	0.0183133	213040000	195250000	159000000	156450000	151010000	106230000
Amacr	-1.53629	0.00108984	13283000	12852000	11955000	9165500	10456000	8082700
Dynlt3	-1.53608	0.000428088	1864700	1978400	1784200	1393900	1495700	1198700
Fam49a	-1.53487	7.12723e-05	12724000	13610000	12219000	9103400	9839000	8991100
Ndufb7	-1.5347	0.000604533	5348300	5184500	5233500	3871600	4016200	3553000
Ints1	-1.53464	0.00821083	1749800	2180300	1605200	1490400	1405100	1113500
Slc7a8	-1.53373	0.000424364	13052000	12658000	11665000	9613900	9554600	8002800
Mknk1	-1.53118	0.00312841	277410	249060	210680	184990	170760	176650
Rab5a	-1.53102	0.00492475	1400800	1729900	1557100	1231100	1159300	1013800
Agpat1	-1.53077	0.0146312	2022200	1858300	1677200	1616600	1193600	1253200
Lgmn	-1.53029	0.000442137	18887000	20589000	17488000	14830000	14436000	12199000
Ube2n	-1.53016	0.00397852	134410000	132070000	113290000	103330000	97875000	76381000
Aco2	-1.53001	0.000198991	544430000	530490000	481410000	369870000	415860000	347340000
Dus1l	-1.52923	0.00324446	484870	461520	427790	362050	307110	331290
Panx1	-1.52893	0.00248885	1726700	1669300	1633000	1317700	1323800	1039000
Cyfip2	-1.52793	0.000790983	8892800	8738100	7937000	6766500	6015900	5845500
Thoc6	-1.52745	0.00166523	1061800	1006200	894650	791780	748160	623130
Procr	-1.52732	0.0142207	205270	236370	222220	193130	158100	136400
Cluh	-1.52646	0.000265724	90314000	90270000	77346000	64565000	68062000	55516000
Twsg1	-1.52592	0.00281638	485030	452820	441510	338380	319340	347590
Unc93b1	-1.52423	0.00374686	4443100	4221400	3916900	3487700	3132800	2613000
Jagn1	-1.52318	0.00893388	2740600	2665700	2310400	2095500	2100900	1493100
Ncapd2	-1.52255	0.000224399	5173700	5696100	4851700	3706100	3951400	3806900
Impdh1	-1.52245	0.00620791	11396000	9313300	8191100	7339200	7257600	6365000
Man2b1	-1.52243	0.000183126	34879000	35210000	31417000	26183000	24386000	23567000
Nfyb	-1.52227	0.00835709	288650	253870	208610	171180	212130	164230
Mta3	-1.52214	0.00147216	332330	312260	269640	229190	246480	193300
Wbp2	-1.52142	0.00325158	5167200	5023500	4355200	4052600	3523900	3093600
Mfsd10	-1.52041	0.00128908	4190700	3971600	3929400	3200700	2964800	2698700
Stk11	-1.52003	0.00110327	958290	948360	789450	721990	658470	591370
Rfc2	-1.51959	0.00369489	254290	308610	233230	205840	209870	166160
Acss2	-1.51879	0.0132074	12946000	10130000	8581000	7788900	8070700	7031800
Gns	-1.51804	8.94292e-05	60534000	58525000	53860000	42935000	42809000	40837000
Sptbn1	-1.51782	4.89757e-05	48088000	49698000	41991000	34245000	34495000	33436000
Nt5c3b	-1.5168	0.0213831	4164800	4017100	3440900	3409700	3051000	2182300
Ddx21	-1.51636	0.000669354	83700000	87903000	71961000	64642000	61234000	52793000
Mmtag2	-1.51559	0.00736747	1231600	994250	1092400	786710	867970	774380
Ndufs6	-1.51349	0.00332711	3228200	2921700	2919100	2119400	2553500	2019500
Hist1h4a	-1.51333	0.000607901	1426900000	1463000000	1297800000	1101600000	988590000	987790000
Mrps10	-1.51255	0.00221476	2273600	2449900	2016700	1822300	1749200	1401500
Gnpda1	-1.51251	0.00217451	57794000	59439000	49187000	45465000	42249000	34986000
Psmb5	-1.51238	0.000469276	55129000	55467000	47277000	41244000	40984000	34022000
Nmi	-1.51158	8.64633e-05	4021900	3982800	3484000	2961900	2842200	2641500
Bdh1	-1.51073	0.000106985	144250000	150420000	137030000	106080000	115220000	97092000
Rab14	-1.50994	0.00130567	125380000	123790000	103060000	93856000	90473000	75301000
Snf8	-1.50955	0.00343829	11168000	12116000	10893000	9592400	8367500	7346800
Uhrf1	-1.50913	0.00833164	2304800	2104100	1837000	1672800	1711900	1245600
Edil3	-1.50787	8.33643e-05	30765000	30888000	27840000	21806000	24042000	20256000
Mob1a	-1.50748	0.000687325	26076000	26764000	23708000	19891000	20477000	16319000
Hist1h3b	-1.5071	0.000676232	635140000	588640000	517140000	453620000	437660000	391520000
Rps6ka3	-1.50697	0.00444571	63504000	65428000	57510000	52320000	47987000	38270000
Rab34	-1.50695	0.000723633	2264000	2506100	2256800	1858100	1728800	1602900
Vmp1	-1.50623	0.00517705	1150800	1246000	1127200	1006400	859300	752680
Noc3l	-1.50622	0.0288858	178320	182030	187610	165830	117170	126220
Adck3	-1.5061	3.5536e-05	37028000	38808000	34990000	27003000	28334000	26472000
Nelfa	-1.50454	0.000118625	644620	731820	601410	494680	503840	459960
Sema4d	-1.50438	8.3659e-05	12007000	12545000	10650000	9077600	9135000	7819800
Snrpa	-1.50398	0.0114474	22628000	22434000	17739000	17302000	17031000	12362000
Rin3	-1.50217	0.00411066	799970	713330	656800	599570	518870	489130
Cycs	-1.50193	0.000123138	325880000	319020000	288880000	241250000	231050000	218860000
Sptlc2	-1.50038	0.00628725	16853000	17140000	13809000	13371000	12452000	9761700
Ndufa3	-1.49967	0.00942227	10874000	9507300	10152000	6938900	8789300	7021900
Rabl6	-1.49915	0.00194131	2920100	2544000	2235000	1918000	2000100	1767800
BC026585	-1.49808	2.67703e-05	10508000	10919000	9531500	7703800	8273700	7023200
Mrps25	-1.49775	0.00223914	6394600	6094000	5487100	4672000	4957200	3781600
Ppp6r2	-1.4976	0.00220666	463940	497960	434960	333150	403820	306040
Pir	-1.49655	0.000230575	3677400	3632900	3463600	2659000	2731400	2615900
Rraga;Rragb	-1.49555	0.00255903	17206000	17242000	14739000	13647000	12634000	10433000
Sec11c	-1.49338	0.0116118	8076400	7981900	7386900	6915700	5982800	4755600
Btd	-1.49327	0.0018806	983270	1166100	963660	813170	746640	752170
Folr2	-1.49313	0.00247022	13713000	12912000	11652000	9978700	10574000	8083300
Cisd2	-1.49271	0.00512714	15035000	14576000	12014000	11228000	11309000	8579100
Scyl3	-1.49164	0.00100362	586780	579800	507700	439970	452850	359480
Polr2l	-1.49104	0.000741094	5910700	5664500	5255600	4487500	4098700	3971600
Ccdc90b	-1.49056	0.00142811	2358900	2380300	2019400	1834900	1771100	1449900
Commd7	-1.48965	0.0046152	9576000	9535900	8272500	7750800	7096100	5717900
Ech1	-1.48945	0.000518562	18224000	17890000	17002000	13295000	13171000	13184000
Tmem120b	-1.48832	0.00198062	248080	260140	228070	205540	187470	159440
Cnot11	-1.48659	0.00808835	405530	442150	359460	353760	298720	255490
Arl2	-1.48561	0.00541988	7064800	7555300	6413100	6091300	5250300	4492600
Ivns1abp	-1.48472	0.000219085	328080	345750	315530	238940	267990	235030
Ndor1	-1.48444	0.00722532	565130	560980	433450	417320	357180	387850
Ogdh	-1.48372	0.000495102	300540000	282080000	240120000	208860000	216940000	189290000
Cul3	-1.48304	0.00146388	37799000	38732000	34018000	30246000	29219000	23775000
Ldah	-1.48285	0.00221513	4287900	4298400	3674100	3320700	3314200	2597100
Bcat2	-1.48269	0.000646488	78219000	82347000	69196000	57377000	64452000	50885000
Ncl	-1.4825	0.00651122	410150000	398220000	302380000	289820000	304100000	236690000
Ercc1	-1.48198	0.00895338	597520	576600	434940	436720	427070	339710
Trmt10c	-1.48122	0.00278767	11157000	11223000	9654800	8877700	8498700	6785100
Tmem33	-1.48117	0.00190171	12768000	14018000	11981000	10827000	9794900	8563300
Rhof	-1.48113	0.000710533	3291400	3257000	2684500	2472900	2354500	2093400
Scarb2	-1.47998	0.013003	455880	419610	369280	366500	319070	256460
Gfpt1	-1.4787	0.000220527	79118000	79327000	70514000	60717000	60437000	51332000
Dtymk	-1.47849	0.000683318	10990000	11217000	9532900	8678900	7868400	7328000
Itfg3	-1.47811	0.000988624	15526000	14185000	12741000	11298000	10894000	9715900
Ctsb	-1.478	0.00167563	124080000	123950000	118340000	98522000	98844000	79665000
Dguok	-1.47799	0.00155344	1210200	1259800	1112800	976930	960800	770470
Itga4	-1.47631	0.000489395	8934900	8992000	8668600	6473600	7089500	6490500
Ppt2	-1.47603	0.00226458	4871000	4741800	4313900	3654200	3291600	3545200
Cbx1	-1.4758	0.00444317	2036900	2273900	1599400	1548500	1463900	1399100
Nadk2	-1.47533	1.70004e-05	1575500	1663600	1435100	1168500	1207800	1142200
Dcps	-1.47432	0.0012747	14273000	14105000	12152000	11154000	10548000	8929900
Ipo8	-1.4737	0.00558063	1222900	1141300	870290	822620	870040	729710
Cd109	-1.47293	0.00057785	16557000	16111000	14284000	11426000	12023000	11944000
Abhd4	-1.47258	0.0034085	982660	1087600	898250	844480	717120	683160
Tgtp1	-1.47249	0.0150613	49503	57383	36171	35560	36506	34114
Snrpn;Snrpb	-1.47171	0.00156744	32142000	32892000	27187000	25702000	23291000	20729000
Lnpep	-1.47145	0.00203082	20435000	20983000	18554000	16907000	15435000	13168000
Gltp	-1.47112	8.45613e-06	29445000	29986000	26984000	22367000	22711000	20273000
Kiaa0020	-1.47101	0.000169436	7305800	7179700	6307900	5533800	5414100	4774500
Mrpl11	-1.47087	0.0012792	17376000	16244000	13816000	12368000	12837000	10622000
Slc8b1	-1.47053	0.00349304	410800	387900	360690	326120	277480	274870
Stag1	-1.47028	0.00135359	1282700	1259500	1070700	965050	871260	890780
Psmb2	-1.47024	0.0011817	85167000	83348000	71831000	64670000	64877000	52624000
Ndel1;Nde1	-1.46977	0.0187346	130740	126580	118190	103240	81445	100820
Snx9	-1.46955	0.00306371	35756000	35442000	30382000	28797000	26229000	22105000
Slc36a4	-1.46955	0.00573703	292930	289590	221720	219160	191630	194210
Gla	-1.46884	1.08934e-05	9815000	10161000	8862400	7175600	7593200	7044600
Gtpbp4	-1.46876	0.00103776	12940000	12438000	10829000	9636800	9830500	7990900
Elp2	-1.46846	0.000123259	5496000	5657300	5002500	3919100	4407000	3914000
Atp6v1d	-1.46824	0.00151045	115760000	115970000	107520000	87988000	96075000	74242000
Ilf2	-1.46815	0.00233949	14147000	14195000	11890000	11119000	10745000	8690900
Fam98c	-1.46788	0.0123965	2362600	2435100	2056800	1818300	2052700	1379400
Xpot	-1.46783	0.00224765	19737000	19862000	17344000	15916000	15086000	12322000
Pabpn1;Gm20521	-1.46701	0.0255997	17374000	16227000	12910000	12818000	13581000	9113600
Cyfip1	-1.46416	0.00105289	203790000	202210000	181240000	162450000	154010000	130880000
Abcb4	-1.4641	0.000190906	5715700	5427200	5019300	4117300	4383400	3783100
Tor1aip1	-1.46395	0.00138618	62584000	58815000	51861000	47673000	44567000	39409000
Exog	-1.46369	0.000979935	842820	790170	711390	640460	600760	540400
Hint3	-1.46338	0.000986795	3211400	3319900	2958200	2634700	2348500	2238400
Rpl27a	-1.46324	0.00425102	158540000	139040000	120140000	104640000	117140000	94903000
4632428N05Rik	-1.462	0.0203627	3420300	2759500	2398100	1943400	2311300	2219200
Nup210	-1.46092	0.00108509	851860	890040	732120	686370	618250	577350
Samd9l	-1.46012	0.000484345	12552000	12439000	11585000	9961800	9537400	8417000
Acp2	-1.45981	0.00160264	30445000	28311000	24618000	22353000	22536000	18634000
Katna1	-1.45903	0.00194728	1354300	1488000	1276700	1153500	1006500	981850
Rpf2	-1.45771	0.00312467	8081000	8099900	6463300	5784800	6508800	4991900
Ccdc132	-1.45605	0.00150203	19737000	20371000	17913000	16437000	14622000	13359000
Bax	-1.45556	0.0111603	8670500	8999200	7394100	7449100	6593300	5242200
Cyld	-1.45395	4.02294e-05	3354400	3330900	3024000	2528200	2625900	2278700
Gpn3	-1.4526	0.0121458	262690	296690	211130	215460	180240	190250
Ndufaf1	-1.45182	0.000218455	2224100	2342900	2062700	1808300	1719300	1554800
Flna	-1.45134	0.000496845	1264400000	1242900000	1058800000	887490000	1006100000	838910000
Nlrx1	-1.45128	0.000179537	3660600	3574200	3292000	2825500	2729900	2513900
Cdk1	-1.45122	0.000156715	1503400	1543300	1262200	1101400	1120600	1068400
Cdk11b	-1.45013	0.000782858	6668400	6557700	5579100	5140600	4717300	4540400
Tanc1	-1.44984	0.00417793	149530	151670	117720	106530	121390	93229
Pef1	-1.44867	0.00290979	4217400	4354100	3679300	3452200	2943300	3009700
Rpl35a	-1.44866	0.0120645	167930000	156580000	136120000	127170000	133920000	95133000
Lsm6	-1.44861	0.00926888	7010500	7341500	6194300	5789900	4690900	5313800
Armc1	-1.4484	0.00765432	1160600	1462600	1176100	1058200	1017700	839600
Pdpr	-1.44797	0.00324766	5036300	4823200	4145800	3870900	3375600	3493700
Rragc	-1.44754	0.000454896	35895000	37820000	31211000	28645000	27944000	24017000
Parn	-1.44676	0.00108322	2673100	2824900	2227300	2045100	2138700	1747600
Capn5	-1.44668	0.00177272	4761700	4485100	3871700	3463900	3253000	3335200
Ahctf1	-1.4462	0.00207938	2585200	2558200	2141800	2044900	1933900	1629600
Mmp14	-1.44616	0.000276706	21653000	20686000	18078000	15850000	16460000	14123000
Chek2	-1.44571	0.0103005	34022	40255	28059	27746	28312	22281
Arfgef2	-1.44553	0.00014263	46043000	46295000	42928000	35827000	36794000	31627000
Trappc5	-1.44547	0.00297485	6744600	7045400	5898200	5696600	4994600	4488600
Isoc2b	-1.44525	0.000971554	4018300	3989300	3786600	3147800	3289500	2672500
Vps37b	-1.44524	0.00336043	1141700	1204000	1076600	991160	845340	805270
Psmd12	-1.4448	0.00237915	134800000	136080000	115980000	110010000	102740000	85890000
Pnpla6	-1.44431	0.000228221	709130	690390	626940	517210	568270	477030
Ppil4	-1.44406	0.00284322	1338900	1387700	1041400	954710	966160	958660
Dars2	-1.44318	0.00555598	1137200	1248200	1143100	815980	1026700	886740
Nhlrc3	-1.44279	0.000198158	4887100	5212000	4795700	3844400	3933900	3700900
Ptpn1	-1.44266	0.00548901	32979000	34545000	29180000	28499000	25110000	21292000
Bop1	-1.44068	0.00677999	1443400	1471500	1057700	1042500	1091800	908370
D6Wsu163e	-1.44007	0.00175751	743710	813560	696100	640670	589720	513700
Cd180	-1.43982	0.00121019	5011500	5059400	4956400	4104000	4019500	3512400
Las1l	-1.4397	0.00117715	2593000	2485300	2273900	2040200	1981300	1671800
Ndufa13	-1.43969	0.00100543	17813000	16512000	16016000	12774000	13299000	12788000
Igf2	-1.43966	0.0247016	384970	473670	461450	338710	319900	358160
Uaca	-1.43944	0.0076711	811370	720220	655780	509750	641850	540460
Crocc	-1.43929	0.00320315	339380	329180	253840	237710	238410	230960
Cd40	-1.43921	0.0019723	608500	699070	610570	527650	482400	471060
Kxd1;Gm8797;Uba52;Ubc;Ubb	-1.4361	0.00391179	1437400	1283200	1097600	1032300	1044400	872460
Myo1d	-1.43477	0.000474915	244310000	236630000	215690000	186850000	193640000	160580000
Polr3c	-1.43407	0.00051186	529150	612890	512690	422340	446990	410980
Tor3a	-1.43405	0.000188176	16332000	16116000	14237000	12033000	12188000	11923000
Sik3	-1.43373	0.00366042	3419700	3260000	2710600	2588400	2613000	2086200
As3mt	-1.43309	0.000656625	10248000	10841000	10275000	8377100	8602300	7406500
Fgfr1op	-1.43236	0.00119821	163520	177680	141170	134140	122900	116510
Atp1b3	-1.43214	0.0035234	113880000	99615000	90980000	80312000	85917000	70075000
Ep300	-1.43116	0.000590356	753440	821970	634260	565210	606690	537760
Hnrnpab	-1.43113	0.00369971	61664000	58831000	47421000	45295000	47043000	37905000
Mydgf	-1.4303	0.0119073	11248000	11675000	10179000	10089000	7880400	7907500
Rps3	-1.43008	0.00530598	384370000	379290000	313770000	307330000	297450000	235440000
Ccnd1	-1.42969	0.0283382	411920	354880	329010	314220	323810	222610
Scaf11	-1.42898	0.00424395	1393300	1581300	1278200	1237200	1074400	999230
Pcyox1	-1.42757	0.00120435	38808000	40855000	34420000	31195000	32229000	25676000
Smpd1	-1.42721	2.98862e-05	3825700	3764100	3313300	2880700	2910400	2694000
Cul4a	-1.42708	0.00206899	6272500	7004100	6250100	5237500	4905400	5060600
Actl6a	-1.4262	0.00261979	20676000	19475000	16522000	15804000	15464000	12914000
Mycbp2	-1.42609	0.0112047	2225200	2557300	1758500	1703100	1886700	1477700
Vps13c	-1.42553	3.44109e-05	35489000	37551000	32852000	28503000	27969000	26089000
Bckdhb	-1.42437	0.000148585	3868000	3681100	3320500	2878800	2909500	2688200
Cd82	-1.42409	0.0019235	36164000	34148000	28281000	25922000	27882000	23026000
Ercc6l	-1.42396	0.00840582	375870	402640	336220	337570	276840	259510
Zc3hc1	-1.42372	0.00844996	3813000	3605100	3106400	3069400	2900200	2287500
Fcho2	-1.4231	0.000621324	16020000	15936000	14798000	13063000	12544000	11009000
Traf1	-1.42292	0.00078047	2040300	2111500	1923700	1673000	1695100	1395900
Atad2b	-1.42262	0.0157854	371940	345900	328110	286740	319620	220150
Ogfr	-1.42211	0.0214986	19726000	19874000	15531000	16186000	15811000	11384000
Tab1	-1.42202	0.011371	3576000	3547400	2698200	2877500	2438300	2334700
Exoc6b	-1.42182	0.0009079	10272000	10825000	9302200	8608100	7769100	7405000
Gdi1	-1.42157	0.000700233	74079000	73224000	65044000	57484000	60264000	48789000
Itgav	-1.42155	0.00221061	147460000	134220000	123670000	109210000	115180000	93214000
Pltp	-1.42123	0.00863887	965660	1144600	897260	746500	764510	833070
Cyth4	-1.41974	0.00382533	25758000	25818000	23596000	21356000	21279000	16605000
Tbl1xr1	-1.41973	0.0022512	498100	453940	381740	358290	354320	326960
Lphn2	-1.41948	0.00737036	422400	448920	386890	335030	302790	347990
Chtf18	-1.41908	0.00976291	167620	162590	148050	130180	145360	102680
Snapin	-1.41871	0.0010404	3115400	3020400	2610000	2330200	2235100	2272600
Ash2l	-1.41732	0.00225865	895310	957020	822920	773930	720810	610940
Mut	-1.41681	0.000323043	63600000	60945000	53249000	45839000	50180000	43420000
Bcs1l	-1.41656	0.00566522	2543700	2326800	2075100	2031200	1829100	1600400
Chuk	-1.41646	0.0213475	1948600	1865500	1729400	1664400	1594800	1146800
Cers5	-1.41611	0.00309637	2053500	2128100	1972600	1791800	1649200	1413700
Rftn1	-1.41588	0.00655554	10212000	9606500	8833700	8259500	8081700	6294800
Ubtf	-1.41546	0.000532927	16846000	16065000	13866000	12427000	13151000	11142000
Slc8a1	-1.41545	8.58851e-05	874080	931520	760030	678750	712790	620710
Cmip	-1.41526	0.00259488	1073800	1083200	897910	791080	911990	702800
Tubgcp3	-1.41496	0.000835097	2798000	2918300	2497300	2344600	2164300	1952100
Pfdn5	-1.41493	0.000550584	25049000	25502000	21679000	20179000	19786000	16850000
Tmed7	-1.41319	0.00122321	33906000	33141000	31473000	27920000	26404000	23391000
Crlf3	-1.41275	0.00534433	8056000	8117200	7050300	6800500	6447800	5131900
Mospd2	-1.41257	0.00628017	10294000	10562000	8942300	8659200	8419800	6511000
Ifi30	-1.41247	0.000256347	56193000	60304000	55172000	44675000	48178000	42421000
Lancl1	-1.41244	0.000237909	4522700	4485600	4155000	3382800	3586100	3393700
Eml2	-1.41243	0.000641133	37484000	39013000	35090000	28826000	32701000	26589000
Eif3k	-1.41242	0.000189054	36078000	37398000	32263000	29408000	27803000	26004000
Nipsnap3b	-1.41197	0.000328444	30580000	31227000	26436000	23725000	25113000	20714000
Arl8a	-1.41173	0.00205265	34800000	33516000	28327000	27179000	24634000	24137000
Fpr1	-1.41173	0.00276199	412430	422550	340240	334570	323360	268090
Vps28	-1.4117	0.000528576	17366000	16895000	15212000	13901000	13121000	11970000
Pafah1b2	-1.41159	0.0245583	16418000	16826000	13112000	12564000	14578000	9676400
Ndufa8	-1.4113	0.00256216	34463000	31676000	31584000	27298000	25580000	24173000
Fnta	-1.41124	0.00242423	11857000	11873000	10339000	9836800	8567000	8456700
Gbp9	-1.41111	0.0197001	132580	133750	149030	120410	111840	96110
Bzw1	-1.41033	0.00232534	71845000	68817000	60567000	54347000	58880000	45910000
Crtap	-1.40962	0.000858602	2321500	2165900	1977300	1645900	1773900	1673000
Rab6a	-1.40928	0.00315434	133850000	139110000	115240000	113300000	105020000	88669000
Tradd	-1.40821	0.00915448	7962700	7531500	6261300	6394700	5973400	4844200
Esrra	-1.40717	0.0189034	65181	61357	47219	42605	44934	48720
Prpf19	-1.40704	0.000200636	42196000	42264000	36478000	33505000	33183000	28906000
Ankh	-1.40608	0.0155445	10833000	11067000	10661000	10123000	8509100	7345500
Rpa3	-1.40606	0.000228209	3904600	3739100	3277800	2838600	3037500	2747700
Rps27a	-1.40566	0.00233551	294740000	309590000	249650000	239670000	215080000	218970000
2610301B20Rik	-1.40519	0.00846517	79109	87191	76402	73886	62067	56998
Clec4e	-1.40496	0.00864572	4015500	3731600	3444400	3342800	3055300	2507600
Tbl1x	-1.40387	0.00256179	4260500	4550100	4137600	3776000	3358300	3146300
Fam89b	-1.40387	0.00553654	463340	424460	356800	341130	358960	285040
Npc1	-1.40249	0.00148618	35877000	34277000	30869000	27890000	29007000	23409000
Eif4a3;Gm8994	-1.40207	0.00153468	56997000	57901000	49267000	47031000	45455000	37975000
Lamtor3	-1.40057	0.000934817	14003000	15512000	12690000	11582000	10928000	10909000
Slc48a1	-1.40054	0.00855576	3333500	3305100	3186300	2877200	2406100	2540400
Pmvk	-1.39871	0.00252543	1020900	930550	850560	733020	740950	748210
Xpo4	-1.3984	0.00148888	5937100	6424600	4999000	4902300	4678500	4183800
Rpl7l1	-1.39776	0.000117537	4582100	4487100	3921100	3574300	3526800	3223000
Rap1b	-1.39722	0.00546472	366070000	354500000	311160000	290940000	304200000	230180000
Speg	-1.39701	0.0104226	80930	106700	86125	73113	73314	70031
Lamp2	-1.39672	0.00325243	71117000	70725000	69086000	58543000	61391000	48832000
Oard1	-1.3964	0.0130702	854910	817480	825810	673540	617840	700950
Ctsc	-1.39544	0.00115994	21114000	20163000	19328000	16428000	17532000	14469000
Rab1	-1.39542	0.00563582	478750000	459890000	399590000	385300000	385440000	300030000
Dus3l	-1.39469	1.70103e-05	7012400	7157300	6479700	5483900	5728000	5252100
Usmg5	-1.39424	0.0171429	25942000	25326000	22426000	22488000	21006000	15838000
Surf6	-1.39417	0.000502566	10651000	10341000	8644200	8083700	8243900	7255700
Hnrnpa0	-1.39414	0.00338423	31016000	28500000	23772000	22809000	23550000	19869000
Ctsf	-1.39354	2.73923e-05	2432900	2614100	2243300	1924600	2063100	1827200
Rab11b;Rab11a	-1.39351	0.000144968	89419000	87357000	78192000	67394000	69600000	66222000
Actn1	-1.39345	3.73608e-05	499960000	496270000	427000000	384030000	397000000	353460000
Mpeg1	-1.39317	0.000262358	25519000	27712000	23741000	21622000	21128000	18705000
Idua	-1.3928	0.00236881	3461700	3338000	3239200	2538100	2792200	2690100
Ext1	-1.39206	0.000285862	662280	652450	568060	505910	544080	454940
Top2b	-1.39119	0.00033106	28580000	28914000	25073000	23353000	22854000	19842000
Psme2	-1.39089	0.00400305	141030000	151380000	132310000	126290000	116560000	98136000
Commd2	-1.3907	0.00106076	12200000	12013000	10791000	9532300	10305000	8237700
Gss	-1.38984	0.00233799	77074000	73343000	66127000	58645000	64548000	50618000
Itpa	-1.38879	0.0245334	5523400	5550100	4624900	5068000	3983100	3608400
H2-Ab1	-1.38794	0.00702809	163650	175110	163760	146190	125630	131520
Pygb	-1.38785	1.51881e-05	58954000	59968000	54322000	47175000	48450000	43256000
Fars2	-1.3854	0.000796921	4328100	4280000	3968800	3581100	3333600	3187400
Wdr33	-1.38509	0.000887572	3400800	3384200	2946300	2800800	2695300	2326300
Hint1	-1.38476	0.00644405	149280000	141980000	120240000	120930000	104190000	104820000
Rnaseh2a	-1.38241	0.01459	1876700	1835800	1677200	1666300	1321000	1367500
Nbn	-1.38214	0.00158269	198550	200880	170760	167220	152250	139430
Micu1	-1.38149	0.00183269	12504000	12613000	10462000	9947900	10391000	8331800
Limd2	-1.38146	0.0126745	586800	630540	487430	457210	425090	484350
Dctn3	-1.38133	0.010805	16816000	17360000	14826000	15077000	12170000	12316000
Sptan1	-1.38113	0.000490615	57899000	58487000	48069000	44373000	47656000	40208000
Cyba	-1.38101	0.0270583	20826000	22344000	19899000	18240000	19922000	13315000
Pitpna	-1.38094	0.00206336	323150000	313260000	269920000	252160000	266520000	212470000
Fundc2	-1.38081	0.0117405	2108300	2277900	1894300	1920800	1768200	1400100
Arf5	-1.38038	0.0113869	33534000	35507000	33257000	31280000	28505000	23237000
Slc25a4	-1.38025	0.00298061	965290000	917410000	821590000	774510000	781440000	629150000
Dynll2	-1.37964	0.00549861	45492000	41470000	33756000	32506000	34705000	29583000
Bptf	-1.37962	0.00142834	300560	275690	249010	232540	223970	207620
Ints5	-1.37954	0.0175065	3513800	3521800	2642400	2310500	2819500	2631100
Ppat	-1.3795	0.000157282	2847800	2769800	2498600	2145500	2280200	2111900
Lamtor2	-1.37907	0.00444561	16448000	17414000	15962000	14969000	13117000	12217000
Chchd7	-1.37863	0.00337838	926760	887990	881380	731600	714710	728550
CXorf38 homolog	-1.37824	0.0171914	767080	827870	617880	640590	660010	487830
Csrp1	-1.37815	0.000723699	36081000	37569000	31445000	30263000	28012000	26434000
Ttl	-1.37749	0.00304816	1760600	1754100	1515000	1248600	1434000	1375800
Ppa2	-1.37745	0.000229329	16098000	15560000	14166000	12732000	12992000	11295000
Mcm3	-1.37737	0.0010217	10578000	10934000	8550300	8196700	8223400	7726700
Trmt10a	-1.37721	0.0139365	118890	116080	117210	98768	87820	98252
Cul4b	-1.37621	0.0014339	26074000	26500000	23050000	22088000	21199000	17959000
2810428I15Rik	-1.37546	0.000121033	2198500	2200600	1953200	1738300	1842800	1560100
Tor1aip2	-1.37497	0.0101726	435220	401550	362530	345700	298540	324990
Spi1	-1.37492	0.00267786	3785300	3610100	3129500	2865200	3163700	2498000
Wdr4	-1.37435	7.91327e-06	739220	773710	662190	603460	608990	546310
Aacs	-1.37423	0.0107865	10772000	10263000	8955500	8545100	9160200	6706700
Wdr74	-1.37409	0.0012541	3275600	3261100	2717100	2524900	2741000	2224400
Dr1	-1.37405	0.00347362	4583300	4870200	4237200	3826000	4144600	3164100
Ttc7;Ttc7a	-1.37334	0.000417425	5104900	5069900	4709400	4235100	4056600	3769400
Slc25a46	-1.37314	0.00090425	2416800	2327300	2232300	1984000	1940400	1733600
No66	-1.37252	0.00223478	2717600	2984600	2391600	2377200	2179300	1992900
Usp16	-1.37209	0.000154785	3131900	3304900	2888100	2639700	2533200	2381700
Deptor	-1.37142	0.000316835	4546000	4750800	4125400	3867700	3678900	3340800
Hdhd2;Ier3ip1	-1.37045	0.0132347	6226300	6285900	5252500	5321800	5250900	3933300
Cul2	-1.36965	0.00217031	18093000	19078000	15474000	15475000	14625000	12640000
Atg4a	-1.36926	0.00462024	1396100	1375600	1115000	1149300	1073500	930380
Fhl3	-1.36922	0.00184103	68139000	61050000	56051000	49932000	52007000	48137000
Cpd	-1.36906	0.00290569	3467200	3753400	3021700	3041300	2802000	2474700
Mfge8	-1.36894	0.000242115	6020500	6134900	5593300	4703600	5225000	4509600
Atl3	-1.36768	0.00219916	53311000	50941000	42043000	41310000	41653000	35694000
Mief1	-1.36659	0.00332054	436120	393310	389890	324190	340960	326250
Snrpd3	-1.36629	0.00011297	32501000	34830000	29007000	27049000	27351000	23948000
Arl1	-1.36623	0.000889786	22074000	22273000	19487000	18732000	17408000	15855000
Skap2	-1.36621	0.000893496	46201000	46403000	40300000	38275000	38162000	31921000
Nme3	-1.36591	0.000208445	1634100	1679100	1560900	1313700	1413200	1245800
Dnal4	-1.36557	0.0243409	51154	46070	53165	41680	44904	36178
Actn4	-1.36514	0.000507562	759800000	735240000	648690000	569120000	634400000	542920000
Naa10;Naa11	-1.36508	0.00311556	3849500	3926200	3446100	3392500	3038400	2733500
Rpl22l1	-1.36503	0.00376586	22871000	22693000	19808000	18705000	16776000	17726000
Hsd17b11	-1.36498	0.00549729	53220000	54151000	46812000	46367000	44160000	35655000
Irf3	-1.36468	0.00213153	12269000	12099000	10034000	9986400	9746400	8286300
Rufy4	-1.36445	0.00109266	7527100	7140200	6046500	5687400	5993000	5165300
Hdhd3	-1.36445	0.00449444	1704800	1853200	1717900	1576100	1455900	1281400
Ipo5	-1.36424	0.00107934	247850000	250420000	218050000	208160000	204930000	171960000
Hnrnpr	-1.36374	0.00245568	45321000	43416000	36147000	36190000	34691000	30740000
Ift20	-1.36353	0.00822582	584840	533030	500130	488910	452800	382320
Mrpl38	-1.36307	0.00179144	5520700	5500900	4955000	4731600	4482200	3855600
Anapc7	-1.362	0.00109171	834540	901880	729200	717590	684030	609040
Fam105a	-1.36195	0.00645442	10976000	10767000	9530500	9537900	8784800	7322200
Vars2	-1.36185	0.0208285	271170	293880	286590	259720	248880	192510
Stt3a	-1.36161	0.0156289	81947000	80108000	68898000	71318000	66759000	51788000
Vps45	-1.36003	0.000101	8864600	9184300	7730800	7282400	7355700	6427500
Wdfy1	-1.35805	0.0248807	35479000	31041000	27188000	27961000	28008000	21009000
Minpp1	-1.35751	0.000821993	2191800	2184500	1922400	1783200	1863300	1524000
Dnajc16	-1.35735	0.00239042	5675900	6090800	5334800	5063400	4904600	4086700
Txlng	-1.35696	0.00375389	294360	279460	250730	230320	251690	195970
Lgals3bp	-1.35669	0.00014073	31967000	33775000	30149000	26025000	26943000	25585000
Commd5	-1.35603	0.000207074	4959600	5098500	4408300	4174200	4086800	3606300
Gmeb1	-1.35583	0.0185656	211580	228630	206620	193770	158780	179370
Aagab	-1.35539	0.000627296	7867100	7958200	7209100	6441100	6873300	5634700
Sec24d	-1.35514	0.0017307	25156000	25973000	22470000	21722000	21177000	17649000
Brat1	-1.35505	0.0122245	2159200	1999400	2002700	1855100	1587700	1623600
Wdr12	-1.35501	0.00420884	4918300	5535200	4411000	4426700	4207700	3566200
Nup37	-1.35495	0.000417695	10761000	10865000	9252400	8942800	8703000	7689600
Alg11	-1.3548	0.0120454	821560	867550	755790	767890	685930	565980
Acy1	-1.35378	0.00240883	43787000	43524000	38060000	35529000	37969000	29824000
Cacul1	-1.35372	0.00174903	4541100	4841300	4244400	4065000	3818000	3335300
Pex16	-1.35333	0.00788532	3333600	3193700	2746400	2679600	2821900	2146900
Arpc2	-1.35331	0.000293519	438860000	433370000	368450000	352220000	344910000	320280000
Cops7b	-1.35307	0.0028973	2210900	2149800	1962500	1898500	1698800	1606800
Rras	-1.35296	0.00768006	10680000	10444000	9824700	9539400	8662400	7369300
Utp20	-1.35245	0.000309175	3717700	3792700	3325000	3141000	2971800	2794100
Mrps6	-1.35153	0.00281989	13363000	12109000	10884000	10496000	10323000	9060700
Camk1d	-1.35153	0.0109788	14731000	15155000	13123000	13016000	12853000	9762400
Dnaja2	-1.35092	0.0156425	27244000	28516000	23516000	23262000	24703000	17746000
Zmiz1	-1.35079	0.0035606	2224500	2085000	1743200	1762800	1673500	1530200
Thyn1	-1.3505	0.00255291	7873000	8063600	6789200	6680400	6657600	5414600
Hmgb2	-1.35021	0.0021425	110850000	117890000	95424000	87677000	99677000	79771000
Plekhb2	-1.35019	0.0128807	485750	442820	459820	416030	401180	331340
Micu2	-1.34974	0.0144164	6216400	5348900	4452100	4250000	4696400	4150800
Rrp1	-1.34935	0.0037064	1497700	1599700	1423900	1359200	1300200	1081300
Rae1	-1.34882	0.0198338	20194000	19024000	17551000	17403000	14065000	15447000
Glmp	-1.3485	0.00196239	3249800	3098800	2635700	2540700	2658400	2205500
Wdr36	-1.34846	0.0116041	4365700	4716900	4567200	3685400	4329500	3308300
Wdr18	-1.34801	0.00507611	6691900	6552100	5964800	5903600	5187400	4797800
Wdr26	-1.34798	0.00012674	12596000	13020000	11513000	10574000	10256000	9782700
Pdxk	-1.34688	0.000149972	63324000	63086000	54701000	51974000	51541000	45945000
Pnn	-1.34682	0.000240574	9748700	9824800	8808000	8239400	7918000	7284400
Ethe1	-1.34663	0.00146694	5179000	4791300	4479600	4099500	3990000	3829500
Auh	-1.3463	0.00332087	10253000	10162000	8822800	8527100	8759800	6940300
Slc39a7	-1.34613	0.0122237	5113500	4767100	3967300	4183100	3998400	3262100
Efr3a	-1.34607	2.0651e-05	4058100	4133300	3561100	3286300	3308200	3100300
Slc25a24	-1.34606	4.63092e-06	80204000	81945000	73423000	65502000	68012000	61124000
Dis3l	-1.34576	0.00106937	458800	433100	369800	347420	368430	324140
Anp32b	-1.3455	0.00825281	46224000	45405000	37622000	37144000	39791000	30182000
Mrps31	-1.34541	0.00757054	13067000	12840000	11455000	11083000	11310000	8664000
Tbcd	-1.34499	0.00360018	33109000	32228000	28589000	28024000	27406000	22466000
Mark3	-1.34427	0.000187302	1008100	1071700	884740	810310	838920	796610
Dhps	-1.34421	0.00105065	5449500	5387000	4720700	4402400	4684000	3808100
Drap1	-1.34304	0.00230121	3130600	3034000	2532700	2470000	2358100	2346200
Wdr20	-1.34282	0.0186539	299300	266080	290930	229930	266170	215160
Chac2	-1.34245	0.00950223	431270	391780	373280	350310	362840	282250
Bud31	-1.34212	0.000560669	5483800	6039800	5348900	4603000	4823300	4542300
Sar1a	-1.34207	0.00447802	78626000	75373000	68576000	64657000	67557000	52967000
Xdh	-1.34196	0.00383797	99552000	97987000	86842000	76363000	89971000	70213000
Rps25	-1.34153	0.000763478	194980000	189730000	161670000	156160000	159670000	136730000
Brd7	-1.34149	0.00454965	714820	780100	687530	615290	578040	614490
AK157302;Isca1	-1.34146	0.00275536	422530	488380	385630	367730	352960	349520
Hdac2	-1.34145	0.00197202	15946000	16669000	14236000	13264000	14365000	11322000
Anp32e	-1.34036	0.00430882	24684000	25616000	19382000	19078000	20824000	17629000
Xpo1	-1.3402	0.00285354	146860000	146430000	126710000	126200000	121390000	101690000
Ttll12	-1.34005	0.00018072	13311000	14143000	12493000	11529000	11520000	10127000
Prpf8	-1.33987	0.000465195	131720000	132370000	116480000	111790000	108880000	95461000
Fam98a	-1.3396	0.0198926	11730000	11467000	9578000	10051000	9905400	7407900
Hat1	-1.33835	4.72804e-05	2449000	2428300	2124800	1928200	2029300	1853900
Sdf2	-1.33809	0.0267429	3151200	3182400	3033400	2928400	2318300	2573900
Ly9	-1.33803	0.00110759	4774400	4798200	4582500	3889900	4008700	3867700
Atg9a	-1.33803	0.0287769	1109700	1200100	918160	1043900	900090	747590
Lpcat3	-1.33788	0.00894136	3060300	2793800	2687700	2531600	2566100	2032700
Klhl9	-1.33737	0.0112327	96727	119290	84602	85739	84818	77227
Rp2	-1.3373	0.000404355	37009000	38949000	35508000	32001000	32682000	28161000
Eya3	-1.33722	0.0174503	2234000	2364000	2038400	2142700	1727100	1674200
Rab22a	-1.33648	0.000630885	8390400	8476500	7693200	7121000	7261900	6099700
Utp3	-1.33537	0.00375541	864550	936610	801900	676120	749530	740530
Zyg11b	-1.3352	0.0260198	2786200	3146300	2722600	2839500	2302400	2110700
Atp6v1f	-1.33496	0.0124717	110350000	95738000	83061000	84576000	84482000	71043000
Plrg1	-1.33438	0.0019131	4115300	3884400	3295100	3271800	3240600	2877700
Pld4	-1.3343	0.00415378	7851400	8731600	8281100	6822700	7147500	6744100
Obfc1	-1.33419	1.93689e-05	511760	518920	466970	426670	431890	389970
Pus1	-1.3336	0.00656907	4067600	4272100	3659000	3580800	3654000	2819500
Pwp2	-1.33337	0.000548783	2869600	2740800	2379400	2235500	2357600	2061400
Ube2h	-1.33327	0.00139379	6559300	6585900	5895300	5673500	5548100	4697600
Exoc4	-1.33302	0.00180302	31696000	32386000	29262000	28268000	26046000	23703000
B4galt7	-1.33204	0.0073702	3058900	3041100	2647100	2724500	2499700	2105400
Ythdf1	-1.33203	0.0066915	1239900	1268600	1067900	1114400	1009100	869740
Gnpda2	-1.33195	0.00352042	8466600	8724900	7372700	7377600	7268000	5915600
Arf1;Arf3	-1.33174	0.00238687	242340000	261960000	230980000	217790000	218550000	179510000
Grb2	-1.33157	0.000819395	53814000	54827000	47355000	46636000	44032000	39660000
Abcb10	-1.33082	0.00114999	1218100	1206100	1005900	1010000	967440	883080
Siae	-1.33022	0.000633475	468760	469490	438190	403470	387770	360370
Cyp20a1	-1.32975	0.00283217	7931400	7856700	6572700	6730300	6414000	5553100
Mgat5	-1.32961	0.000403382	1001800	956260	866660	789960	841580	731140
Myo10	-1.32885	4.34177e-05	8445800	8352800	7349900	6731800	7110600	6352700
Inf2	-1.32873	0.000872868	75621000	73589000	65305000	63630000	61402000	54568000
Rtn3	-1.3284	0.00984012	29988000	27961000	25541000	24684000	25779000	19758000
Nxt1	-1.32803	0.000343794	818120	866070	744000	663210	741620	629740
Dpm1	-1.32789	5.20377e-05	14517000	14489000	12441000	11704000	11943000	11003000
Ddx60	-1.32787	0.00816615	294110	288340	287730	263770	235620	230770
Lyn	-1.32771	0.00713743	76037000	73849000	63186000	64524000	63509000	50911000
Asnsd1	-1.3276	0.0107604	231290	225740	235620	196940	213140	172360
Uqcc1	-1.32753	0.000954474	2280600	2217400	1841100	1807900	1814200	1669700
Uqcrc2	-1.32741	0.00041183	132570000	131010000	122490000	111830000	112920000	99127000
Umps	-1.32739	0.000262104	59712000	58209000	51336000	47313000	50772000	43706000
Setdb1	-1.32641	0.00114082	1659500	1700100	1439700	1388900	1453000	1186900
Sbds	-1.32619	0.00136147	34088000	34340000	28913000	28963000	28369000	24304000
Emg1	-1.32612	0.0012761	2535800	2786700	2172400	2162400	2123400	1972900
Opa3	-1.32584	0.00266516	1883600	1847900	1645000	1530700	1459600	1513400
Myo6	-1.32553	0.00151911	2126800	2162900	1786000	1792000	1791000	1512600
RTRAF	-1.32502	0.00537146	76579000	77025000	67644000	66709000	58475000	60508000
Pus7	-1.32418	0.0214251	201910	236810	187210	196950	161770	166530
Galnt1	-1.32391	0.00762651	4691100	4454100	3735200	3720100	3985800	3121700
Ric1	-1.32357	0.00856219	575910	565270	438560	467080	462470	392290
Lyrm4	-1.32342	0.00339017	10845000	10762000	9421900	9244200	8325100	8483300
Vrk1	-1.32311	0.00149483	5137200	5455900	4896900	4626500	4280600	4117700
Cep350	-1.32304	0.0274046	1337300	1089300	950020	919490	1025000	872590
Kntc1	-1.32298	0.000486603	1265600	1229200	1054100	1022700	1041500	915000
Gm17296	-1.32213	0.0062894	1781500	1894900	1624900	1627800	1577900	1271700
Mrpl22	-1.32198	0.00441806	8245600	8290700	7583000	7481200	6861600	6015300
Supt4h1b;Supt4h1a;Supt4a	-1.32124	0.0270783	1046000	932890	1024400	912160	808200	809020
Stambpl1	-1.32081	0.000169403	7648700	8033900	7209600	6660900	6722400	5909400
Clec4d	-1.32051	0.00159123	4959700	4790500	4324400	4228100	4078000	3561300
Col4a3bp	-1.32033	0.000214811	17147000	17277000	14918000	14327000	14652000	12588000
Fdx1	-1.32008	0.00260015	1938900	1876200	1562200	1599000	1510900	1407200
Rgs10	-1.31925	0.00382057	23817000	23533000	21615000	19772000	18719000	19619000
Ssr4	-1.31907	0.00484216	19579000	20549000	16229000	17165000	16206000	14075000
Abhd12	-1.31884	0.00668217	31459000	29933000	30563000	25639000	26121000	25781000
Cnot6l	-1.31882	0.000438149	386610	377670	355530	312110	329330	303000
Ddb1	-1.31865	0.00202126	131590000	134840000	113600000	112460000	114830000	93686000
Pa2g4	-1.31829	0.0171273	255090000	241310000	201510000	209750000	216390000	164160000
Igsf6	-1.31813	0.000301508	6521500	6240900	5566900	5183600	5436800	4830800
Tceb1	-1.31811	0.00141426	22309000	24167000	20325000	20119000	18608000	17589000
Fmnl2	-1.31777	0.000169941	3802400	3886800	3478300	3293200	3237500	2899900
Serpinb8	-1.31775	0.00538625	105150000	101500000	91142000	89008000	91130000	72124000
Metap2	-1.31745	9.15213e-05	75096000	73895000	65160000	61152000	63663000	55897000
Rps6ka5	-1.31738	0.00873953	5423500	5494800	4796600	4894900	4677000	3758300
Snx29	-1.31736	0.000142178	2157600	2248300	1896400	1818300	1787600	1703600
Sh3glb1	-1.31685	0.000148341	123690000	127340000	114600000	104250000	110490000	94439000
Naip2	-1.31654	0.00359841	4941900	5154500	4999000	4197500	4664400	3922300
Khnyn	-1.31644	0.0288153	256620	279730	240560	256860	222580	182200
Trappc3	-1.31628	0.00599404	27504000	27568000	24844000	24535000	21367000	21683000
Anxa2	-1.31622	0.00698962	832890000	733370000	697600000	678560000	642050000	590290000
Lias	-1.31582	0.00441677	835630	857480	821700	684870	722250	719020
Mid1ip1	-1.31573	0.00100853	5591400	5957900	5409900	4697000	5235800	4427900
Usp24	-1.31565	0.00033414	18818000	19518000	17298000	16490000	16355000	14236000
Btaf1	-1.31514	0.001092	3982500	3866800	3223500	3200100	3257000	2881400
Arhgef2	-1.31498	0.000147644	53402000	55179000	49151000	46522000	45335000	41561000
Atp5c1	-1.31468	0.0267113	312720	358020	310730	307090	250370	274040
Ppp2ca	-1.31438	0.000449696	97818000	98713000	88957000	80442000	81295000	79603000
Smek2	-1.31424	0.0010839	443370	477850	384270	361840	375430	363350
Lrpprc	-1.31423	0.00197553	381700000	371910000	328830000	325900000	320040000	271350000
Gnas	-1.31399	6.41503e-05	14342000	14109000	12717000	11616000	12184000	11029000
Atp7a	-1.31396	0.00522584	4560700	4270000	3799500	3363800	3705200	3601400
Ppih	-1.31369	0.00489306	17587000	17015000	15526000	15135000	13541000	13761000
Camk2g	-1.31301	0.00310414	6397500	6354000	5201700	5332400	5363600	4494800
Lrrc40	-1.31289	4.02216e-05	8480100	8817600	7814700	7287800	7446600	6548000
Mllt6	-1.31284	0.00111987	291140	281510	250020	225380	254380	217380
Arhgap17	-1.31276	0.00058437	15970000	15345000	14133000	13196000	13599000	11741000
Slc25a25	-1.31168	0.0083574	210290	198470	206900	182000	175540	164830
Rcc2	-1.31103	0.00137261	42156000	43343000	38998000	33336000	37977000	34373000
Fuca2	-1.31083	2.32569e-05	813360	828000	728940	672390	715130	623770
Sec13	-1.31079	0.00180453	32558000	30844000	27896000	27209000	27097000	23218000
Ten1	-1.31068	0.0010884	869600	964750	778740	774690	744660	692200
M6pr	-1.31045	0.00764174	96119000	91688000	78248000	81941000	78494000	65565000
Fryl	-1.31041	0.00013345	9038600	9212900	8461800	7775500	7865500	7046200
Pecr	-1.31014	0.000984628	1706500	1647700	1564600	1418000	1489000	1275100
Gng5	-1.30999	0.000325247	48735000	46977000	43610000	39571000	41688000	37054000
Rap2b	-1.30966	0.0012882	30509000	28436000	25858000	24668000	25315000	22007000
Puf60	-1.30965	0.00010147	46084000	45793000	41020000	38384000	39876000	34649000
Dpp7	-1.30959	0.0125484	17747000	18619000	18634000	14960000	15885000	15876000
Pafah1b1	-1.30953	0.00596031	97069000	98310000	85298000	86752000	84145000	68332000
Gnai2	-1.30896	0.000688693	225430000	228980000	196280000	195570000	190470000	166890000
Gm49804	-1.30888	0.0040785	93136000	91256000	77066000	77012000	80713000	64670000
Oxr1	-1.30862	0.00172503	128310000	137050000	118110000	114110000	116810000	95693000
Ipo7	-1.30831	0.000166698	47291000	49143000	42994000	41219000	41344000	36032000
Akr1b10	-1.30829	0.00355749	22237000	22255000	20068000	19942000	18991000	16116000
Mob4	-1.30777	0.00328395	17997000	17570000	15865000	15561000	15543000	12762000
Clptm1l	-1.30764	0.00191906	3544400	3886800	3236400	3235800	3136700	2703800
Nckap1l	-1.30714	0.00375165	118250000	119440000	104600000	98273000	109140000	84874000
St6galnac4	-1.30682	0.0190163	1932300	1680400	1404200	1466100	1512300	1268100
Ubl4a	-1.30615	2.45284e-05	5681000	5844100	5067300	4681200	4878200	4549700
Man1c1	-1.30556	0.000414857	1509100	1483800	1366000	1277600	1308900	1131200
Ykt6	-1.30547	0.0117683	60542000	63384000	54335000	56383000	53458000	42788000
Cdk5rap3	-1.30527	0.00927435	33948000	33696000	29731000	29433000	30590000	23376000
Sephs1	-1.30412	0.000504074	13079000	12837000	11557000	11211000	10837000	9909300
Hp1bp3	-1.30383	0.000219177	55438000	55001000	47862000	44218000	48245000	42478000
Ddx54	-1.30361	0.000252299	1844100	1906900	1717000	1563700	1578200	1519900
Hacd3	-1.30356	0.00869497	4126400	4416500	3719500	3874100	3319400	3275000
Plxnb2	-1.30328	0.000447597	58752000	60293000	53211000	51361000	48826000	46726000
Arhgap22	-1.30262	0.0209713	1133600	1103800	1164300	898820	1069300	943730
Prep	-1.30254	0.00301138	182890000	182540000	158450000	159150000	158670000	130450000
Abhd11	-1.3021	0.0023301	10507000	10643000	9511800	9278500	8473600	8433200
Mrps7	-1.30199	0.00102132	15743000	15340000	13761000	13542000	13174000	11615000
Dnaja1	-1.30195	0.013743	58632000	62174000	56704000	53211000	56980000	42512000
Cant1	-1.30139	0.00313256	3254800	3681600	3319800	2938600	3152300	2681400
Capn7	-1.30117	0.0288655	3094300	2862300	2550400	2679700	2650800	1986500
Ppfibp1	-1.30098	0.000135952	10580000	10661000	9263700	8640900	9365200	8069400
Pnpt1	-1.30098	0.00662397	39399000	39112000	35180000	35988000	31533000	29858000
Uap1l1	-1.3009	0.00150428	311690000	296760000	278800000	249200000	275380000	234900000
Khdrbs1	-1.30089	0.0282535	16991000	15833000	12426000	13104000	14480000	11013000
Athl1	-1.30087	0.00047832	744400	811470	659300	639790	639860	608170
Tdrd7	-1.30064	0.00073541	2245800	2294600	2047200	1900000	1869200	1857900
Gbe1	-1.30038	0.00150474	12481000	12886000	11690000	11313000	10937000	9509800
Glyr1	-1.30036	0.0108858	12952000	13052000	10940000	11527000	11243000	8931600
Nhp2l1	-1.30015	0.0181294	61934000	59964000	49891000	50482000	45522000	50487000
Psmb8	-1.30003	0.0119073	32678000	31284000	25697000	28084000	26003000	22531000
Naa20	-1.2996	0.00248053	2556900	2688200	2427400	2345100	2298100	1941100
Hdhd2	-1.29957	0.000649048	21816000	22667000	21061000	18425000	20045000	17682000
Dpm3	-1.29936	0.000606603	2408800	2626700	2241300	2187300	2104900	1932200
Decr1	-1.29921	0.000383595	31662000	32142000	29935000	26421000	28126000	25725000
Srp72	-1.29916	0.00046428	33159000	34078000	30341000	29388000	28937000	25303000
Dek	-1.29893	0.00304096	16313000	16662000	13774000	13848000	14500000	11708000
Dtd1	-1.29892	0.015681	554410	585480	425410	472230	438010	419230
Qsox2	-1.29879	0.0203427	7412600	7251300	5661600	6278300	6163300	4939900
Tmem209	-1.29873	0.0073521	353770	338070	342370	296840	295040	293740
Rrp7a	-1.29832	0.00422443	1132400	1071800	1013100	962330	990880	810870
Nmd3	-1.29705	0.00315054	955340	1048500	934370	876070	821660	820020
Pigs	-1.29685	0.00106946	22512000	24605000	21584000	20076000	19600000	19171000
Glipr1	-1.29658	0.0023436	2023800	2100700	2012600	1792400	1883000	1600500
Rapgef1	-1.29658	0.014463	3036100	2995900	2444300	2715200	2358700	2191900
Trove2	-1.29554	0.0045754	1218000	1176100	1082500	963760	1125100	905070
Septin-7	-1.29536	0.00700313	88119000	86986000	73642000	70640000	80891000	62544000
Tyw5	-1.2953	0.0150162	930840	983390	731750	820920	771080	670090
Ccs	-1.29479	0.00983781	9388100	8564600	7630100	7151000	8270700	6576600
Akr1e2;Akr1e1	-1.29442	0.00310344	16683000	16801000	14071000	13549000	15189000	12160000
Vipas39	-1.29398	9.1304e-05	7922300	8213400	7109500	6717700	7150700	6116800
Glod4	-1.29274	0.000488546	66007000	65501000	57748000	56424000	57379000	49125000
Rab10	-1.29198	0.00250414	99323000	94624000	89869000	82820000	81231000	80113000
Psmd13	-1.29164	0.000673545	98524000	101750000	89212000	88522000	84279000	76559000
Cs	-1.28977	0.0055364	571690000	531600000	456760000	440840000	493380000	409400000
Rbbp4	-1.28963	0.000875795	12183000	12583000	10144000	9880100	10463000	9652000
Acta1;Actc1;Actg2;Acta2	-1.28945	0.00602858	531900000	528720000	429220000	449990000	458540000	375490000
Ccnyl1	-1.2894	0.000606328	460380	472860	416850	388620	389690	384710
Ttc38	-1.2887	0.00476483	3863600	3966800	3515500	3028700	3478000	3288800
Traf5	-1.28857	0.00297996	1025300	1015500	964870	919980	857270	819350
Ythdf2	-1.28836	0.000968464	1466500	1493900	1309400	1284500	1311900	1095500
Btbd1	-1.28807	0.00427502	1058000	1061100	1029200	970550	923630	830000
Kif3a	-1.28801	0.00626906	4357800	4136300	3620200	3622800	3814900	3040900
Prmt5	-1.28772	0.0100623	28973000	28781000	23385000	23825000	26085000	20222000
Nt5c2	-1.28752	0.00175889	24470000	24802000	22920000	21425000	22557000	18559000
Pmm2	-1.28752	0.0107904	54847000	50587000	42297000	45439000	43694000	38114000
Plcb4	-1.28724	0.0105136	1859500	2186000	1764200	1631100	1658000	1711000
Tpm1	-1.28696	0.0220253	50784000	49755000	40314000	42430000	45607000	33986000
Ppp2r1b	-1.28676	2.3695e-06	24103000	25253000	21601000	20757000	21178000	19320000
Tma16	-1.28623	0.015358	15388000	15473000	12771000	12943000	14289000	10633000
Retsat	-1.28603	0.00876527	1126800	1129400	913060	860740	938290	930930
Ppp2cb	-1.28531	0.00269283	3769900	3686400	3462200	3373900	3242700	2850500
Ago1	-1.28465	0.00367751	1380500	1504300	1242900	1247100	1288900	1042400
Ddx46	-1.28464	0.00259507	38798000	37203000	31292000	30846000	33449000	28417000
Nvl	-1.28453	0.017722	408070	486080	382160	336790	408410	357830
Gemin5	-1.28386	0.0155415	6418200	6033400	5432300	5798300	5230900	4510000
Stam	-1.28371	0.0140504	70026000	68375000	70743000	58347000	67048000	56329000
Csf1r	-1.28346	0.00173458	53121000	55842000	53075000	46814000	48744000	44909000
Arhgef10l	-1.28331	0.000314807	3783400	3944200	3328000	3190900	3239700	3128200
Fen1	-1.28305	0.00611789	11476000	11653000	9895000	9757300	10684000	8270500
Pgd	-1.28273	1.49993e-05	845880000	853960000	747920000	717090000	745370000	659070000
Nfatc2ip	-1.2822	0.00986641	433190	402350	383390	327340	385090	346080
Mrps23	-1.28163	0.00168831	22076000	21185000	19250000	17560000	18742000	17883000
Lyar	-1.28159	0.010235	2525300	2335200	1919300	1894500	2113900	1847600
Cyb5r3	-1.28153	0.0285147	182950000	158210000	142260000	148610000	152040000	119170000
Atp2c1	-1.28133	0.000599142	10123000	9676400	8836900	8250800	8826000	7775500
Mrps17	-1.28079	0.0020832	9558300	9397600	7752700	7625500	8341200	7171500
Ints4	-1.28067	0.00170909	1966100	1925400	1727300	1580700	1666900	1625900
Uqcc2	-1.28057	0.00101413	9004600	8788000	8325500	7840100	7720200	7132900
Pdk3	-1.28025	0.00151335	12689000	12018000	11210000	10842000	10834000	9545000
Anapc1	-1.28017	0.000784333	1585500	1671300	1333800	1356300	1371600	1246200
Rela	-1.28003	0.00111246	6790600	6775200	5845300	5906200	5916200	5049800
Nptn	-1.27985	0.00327634	35018000	34195000	28442000	27194000	29575000	27798000
P2rx4	-1.27983	0.000540229	14045000	14274000	13103000	11746000	12537000	11711000
Uso1	-1.27979	0.00695578	108470000	102910000	90496000	91691000	95010000	76132000
Pgap1	-1.27968	0.00390591	168490	173510	149160	154030	138180	134550
Ermp1	-1.27944	0.000752261	19067000	18661000	17020000	16568000	16624000	14447000
Tnpo2	-1.27878	0.000612758	6116800	6219500	5415000	5266200	5557200	4632300
Manf	-1.2787	0.0174058	76182000	76601000	67842000	69060000	58953000	64007000
Arrb2	-1.27867	0.00213513	10440000	10366000	9052000	9255300	9006200	7736300
Nudt13	-1.27854	0.00127285	3993700	4183000	3679300	3645100	3401600	3264100
Wdr3	-1.27853	1.46746e-05	5112300	5181400	4591900	4423600	4471700	4049000
Suz12	-1.27849	0.00210342	376480	354920	332810	320200	309920	295090
Nop9	-1.27807	0.00393322	1784000	1637300	1496100	1489600	1428000	1354300
Igsf3	-1.27788	0.013243	106400	120270	106570	89063	107780	93685
Lix1l	-1.27768	0.0177079	196240	208610	187610	196010	167670	154190
Cdkal1	-1.2776	0.0114655	444590	423340	357920	329790	375900	358620
Upf2	-1.27738	0.00157897	4287000	4065800	3850800	3549400	3804800	3281400
Arhgap4	-1.27708	0.0198133	2723200	3139800	2427200	2439600	2274800	2470900
Polr3h	-1.2764	0.00233784	651650	696250	589480	541360	626890	521510
Adrm1;Gm9774	-1.27634	0.0219039	8405900	9349500	7529400	8379900	7188300	6502200
Api5	-1.27624	0.00411142	36808000	36434000	29763000	30231000	32590000	26820000
Dnm2	-1.27623	0.0255198	4372300	5237200	4843400	4286900	4110400	4167200
Rcor1	-1.27598	0.0010393	2702700	2858400	2480300	2332400	2340400	2325400
Tmed3	-1.27592	0.00578873	11980000	12374000	11302000	11281000	10804000	9107400
Icam1	-1.27588	0.00149945	65742000	63469000	57606000	54854000	59081000	49140000
Prrc1	-1.27553	0.000217424	59324000	62305000	53406000	52713000	51227000	48475000
Acad9	-1.27535	0.00198986	36120000	35113000	30308000	31325000	30201000	26956000
Prkag2	-1.27525	0.000902603	1791900	1974600	1625900	1588000	1577700	1523700
Mtor	-1.27521	0.000354832	12785000	13133000	11524000	11397000	11387000	9894100
Hps5	-1.27514	0.00298732	4102900	3821200	3349100	3393500	3309700	3102900
Esd	-1.27492	0.00319343	663520000	659260000	591530000	578260000	607550000	489140000
Dicer1	-1.27472	0.00433387	1515600	1562400	1278800	1371000	1288000	1139400
Sec31a	-1.27439	0.000759604	211100000	221080000	189430000	192210000	184200000	166040000
Heatr6	-1.27373	0.0224087	1060900	1142500	1017300	1003200	1050800	779000
Pex7	-1.27368	0.0036171	446900	464440	362180	382160	372800	351410
Glrx2	-1.27353	0.0117109	624270	573270	566630	540430	498840	501160
Ogfod2	-1.27326	0.0107807	332620	346730	282490	307180	267470	264360
Ankrd28	-1.27316	0.00193843	2166800	2144700	1925000	1942500	1878400	1634800
Glb1	-1.27298	0.00256276	9942000	10408000	9151100	9044600	9234600	7563400
Mon1b	-1.27288	0.0168863	592430	517940	541470	501190	489300	452080
Ero1lb	-1.27251	0.000283347	2836900	2995700	2560300	2487200	2625500	2225500
Trim33	-1.27226	0.0234185	3128300	3751800	2913700	2945300	2691000	2883300
Lactb2	-1.2719	0.000649215	24928000	24121000	21301000	21313000	21033000	19110000
Mpc1	-1.27117	0.00170307	12549000	12259000	10983000	11011000	10975000	9367600
Bag1	-1.27032	0.00367234	15935000	15630000	13363000	14068000	12984000	12232000
Scfd2	-1.27025	8.00567e-05	4914100	4893000	4418600	4167900	4301000	3979600
Abcf3	-1.2701	0.00256264	3827200	3942300	3320000	3489900	3296700	2924600
Dhx15	-1.27001	0.000807915	82283000	82923000	71364000	72984000	71171000	62980000
Hpf1	-1.26975	0.00224705	1982300	2175700	1856100	1880200	1773700	1613500
Zc3h7a	-1.26914	0.00074352	1887400	1990700	1752700	1685100	1639200	1604900
Pik3cb	-1.26889	0.00397934	38457000	38511000	34286000	34467000	34903000	28432000
Rpl18a	-1.26889	0.0106767	284520000	300900000	249800000	246190000	277810000	210630000
Sestd1	-1.26869	0.000250285	2998400	3238000	2662600	2630100	2663600	2486900
Fam177a1	-1.26839	0.00148767	10096000	10377000	8467500	8455000	9164700	7721000
Ap1g1	-1.26831	0.0175641	82078000	82727000	71007000	78062000	69794000	59696000
H2afv;H2afz	-1.26822	0.0226919	43363000	39870000	32113000	36211000	33975000	30448000
Tor1b	-1.26815	0.00437268	4085900	4113800	3507400	3681300	3587600	3012100
Ppp2r4	-1.26789	0.00250573	19756000	20184000	17601000	18157000	17308000	15080000
Ptpn9	-1.26746	0.000101238	4979800	4897100	4402300	4187400	4368500	3966700
Pdp2	-1.26672	0.0011686	1030800	1120200	921030	946810	926050	821240
FRRS1	-1.26672	0.00805272	13222000	12245000	11444000	11302000	11691000	9494200
Pla2g7	-1.2667	0.0197249	74273000	77111000	78695000	64085000	71225000	66858000
Eepd1	-1.26573	0.00550945	1285500	1330000	1126700	1191300	1063300	1032100
Cbll1	-1.26568	0.0217644	223830	239440	180350	177280	214730	172330
Cd151	-1.26521	0.0019412	2150200	2003100	1903400	1792700	1858700	1671700
Smek1	-1.26516	0.0027474	5191400	5143700	4448600	4639800	4480400	3883400
Rbm25	-1.26501	0.00252897	20396000	21303000	19174000	18836000	17499000	17183000
Por	-1.26483	0.000356879	164570000	165510000	143260000	143300000	146630000	126300000
Slmap	-1.26467	0.00254842	2448300	2360300	2210300	2179500	2134100	1868200
Ltn1	-1.26466	0.00123286	8193200	8208300	7392300	7275200	7438700	6250500
Trappc6b	-1.26417	0.00463325	7122200	6807800	6491800	5820800	6145900	5993700
Ing4	-1.2641	0.0241825	979950	1174800	1045000	993890	1007400	818600
Lcp1	-1.26394	0.0195953	2142400000	1987300000	1702000000	1756800000	1913300000	1469400000
Mprip	-1.26363	0.00462794	4967600	5102700	4284400	4585700	4179200	3865000
Tars2	-1.2633	0.000104544	24855000	24854000	22304000	21655000	21611000	20096000
Gps1	-1.26291	0.000972184	23491000	23523000	21280000	19855000	21965000	18422000
F8a;F8a1	-1.26282	0.00365284	10225000	10287000	9008400	9424200	8649900	7942900
Tmem147	-1.26259	0.00687853	441230	474340	377140	401270	405030	332070
Vps51	-1.2619	0.000263846	12093000	12580000	10892000	10681000	11182000	9501800
Abcb1b;Abcb1a	-1.26124	0.000277163	4093800	4212600	3723200	3674600	3718600	3223200
Oxa1l	-1.26103	0.00469884	5136700	4754000	4156700	4156800	4445700	3769500
Gnb2l1	-1.26038	0.00418973	359710000	365660000	311190000	331650000	304550000	278540000
Pole3	-1.26011	0.00295073	638860	681300	540230	539310	555580	539710
Akap10	-1.26006	0.00693867	9864900	9820200	7818600	8360800	8614200	7234100
Sumo2	-1.25981	0.00264403	62752000	62231000	55398000	55310000	57313000	46971000
Ciao1	-1.2597	0.00559739	3974300	4047100	3287000	3586000	3364700	3016700
Ehbp1l1	-1.25963	0.00819252	19534000	19520000	17140000	18190000	17049000	14511000
Usp3	-1.25935	0.00133603	1168600	1175100	1048400	1046700	988120	959140
Parg	-1.25932	0.00288142	1602500	1684400	1433000	1339600	1552000	1282000
Ercc2	-1.25926	0.0012082	1245400	1296900	1042400	1066400	1073600	1013500
Chrac1	-1.25918	0.0155827	708150	745660	659550	592490	616210	657540
Ufl1	-1.25912	0.0016585	20754000	21256000	18914000	18541000	17656000	17573000
Borcs6	-1.25886	0.00154479	2535200	2414000	2247700	2187100	2235000	1941300
Rnpep	-1.25876	0.00717861	208910000	207000000	180270000	186550000	189640000	152050000
Zmat2	-1.25851	0.0108133	5620500	5736800	4829100	4953900	4515400	4805900
Dpy19l1	-1.25848	0.0249811	152560	148160	127430	142310	129860	107610
Mcm6	-1.25846	0.000146224	16707000	17377000	15034000	14450000	14789000	14102000
Gpnmb	-1.25814	0.000383217	129680000	136320000	121020000	117120000	121430000	103950000
Gm16286	-1.2578	0.0116494	6361200	6154700	5357800	5822100	5139700	4848100
Aaas	-1.25768	0.00251002	4417200	4728100	3709700	3846200	4026600	3460700
Setd3	-1.2575	7.08054e-05	18313000	19719000	17059000	16541000	16946000	15210000
Xrn2	-1.2575	0.000618659	23389000	22453000	20054000	19925000	19982000	18306000
Ctbs	-1.25748	0.0105645	2989500	3418900	3108100	2808100	2810100	2786300
Ccar1	-1.25704	0.00168836	15022000	14404000	12784000	12873000	12469000	11940000
Scly	-1.2569	0.00170172	21145000	21016000	18622000	18952000	18827000	16074000
Urod	-1.25656	0.00153735	19901000	20881000	18340000	18051000	18828000	15554000
Ypel5	-1.25631	0.0267977	1524900	1478300	1362500	1379400	1185200	1303900
Akr1b1;Akr1b3	-1.2563	0.00930008	379130000	359950000	319160000	323510000	343770000	271810000
Gvin1	-1.25609	0.000937322	17109000	17041000	16210000	15011000	15598000	14017000
Memo1	-1.25514	0.000508012	16026000	16165000	14407000	14096000	13802000	13352000
Idh3b	-1.25468	0.0129331	121350000	113180000	96968000	104510000	103380000	85883000
Rab3gap2	-1.25431	0.0170728	118890	124710	110710	100830	102490	110770
Ywhaz	-1.25427	0.00216017	481750000	471570000	401000000	415160000	424020000	360910000
Nhp2	-1.25427	0.00456934	7514400	7903100	7066900	6280300	6977200	6679500
Usp45	-1.25411	0.00978589	102110	95621	96616	87283	88069	85623
Glul	-1.25379	0.0257446	17126000	17395000	17108000	16031000	14379000	15439000
Lsm8	-1.25288	0.0103015	4547200	4819500	4073000	4228400	4338100	3405200
Fmn1	-1.25281	0.012686	6053500	6051800	5446600	5623600	5593500	4439300
Xpo7	-1.25256	0.00973805	10148000	9559600	8167100	8789800	8075400	7816800
Aldh3b1	-1.25239	0.000556566	19235000	19763000	16710000	17307000	16855000	15255000
Mocos	-1.25235	0.000953884	8772600	9089100	7884900	7574200	8366500	6951600
Vac14	-1.25186	0.0038696	34434000	34740000	31074000	31996000	30892000	26380000
Aifm2	-1.25127	0.00350239	16834000	16842000	15006000	15260000	15397000	12720000
Ctu2	-1.25097	0.0170693	2794500	2821400	2457700	2640800	2535500	2034500
Ccz1	-1.25083	0.00757089	9827000	9723400	8286800	8841700	8743900	7202000
Supt16;Supt16h	-1.25052	0.00366445	14928000	16132000	14230000	14409000	13870000	12066000
Pcyt1a	-1.25051	0.00208724	32089000	32072000	28259000	29278000	27336000	25573000
Chd4	-1.2497	0.00033317	25455000	26900000	23721000	23384000	22843000	21441000
Cope	-1.24963	0.00501929	65240000	66008000	59364000	60966000	59297000	49871000
Wars2	-1.24944	0.00317669	1897900	1820200	1754000	1587600	1713700	1571400
Iqgap1	-1.24916	0.000619668	924500000	894870000	784780000	771450000	821080000	723660000
Dkc1	-1.2488	0.00040278	15641000	16006000	13996000	13192000	14617000	12840000
Tlr13	-1.24858	0.000409614	2100400	2179000	1868700	1865000	1831600	1770100
Hsd17b4	-1.24846	0.00153868	99094000	97519000	88625000	82685000	92686000	79033000
Tmed5	-1.24808	0.0248036	21699000	19424000	16081000	16958000	18459000	15327000
Top2a	-1.24786	0.00744995	9900900	9195800	8704400	8078900	9151600	7591200
Ncapd3	-1.24784	0.00179286	995610	1063800	916940	895010	968110	793850
Rala	-1.24765	0.0176186	28681000	28248000	26273000	26246000	27351000	21011000
Tsta3	-1.24758	0.000957221	19284000	18852000	16745000	17111000	16765000	15039000
Cux1	-1.24728	0.0195109	17420000	16023000	12962000	14215000	14475000	12470000
Rab7b	-1.24697	0.00852955	717330	713500	605100	620220	672060	527360
Rps26	-1.2465	0.00711209	21310000	21962000	19029000	20396000	18654000	16632000
Nudt16	-1.24637	0.000370886	13779000	13459000	12436000	11954000	12361000	11094000
Armc8	-1.2462	0.00137523	7707000	7647300	6933400	6823500	7131000	5971300
Csnk2a1	-1.24617	0.000220481	40756000	40760000	36650000	36467000	36315000	32694000
Rnf14	-1.24588	0.00721321	8745800	8927400	7765200	8154300	8038300	6582500
Atp5f1	-1.24575	0.0213975	115230000	112610000	101230000	107070000	105630000	82679000
Smyd5	-1.24561	0.00896064	22882000	23472000	22900000	21243000	22335000	18458000
Hras	-1.24557	0.00416351	9130500	8726600	7904100	8082500	8112200	6840700
Heatr5a	-1.24555	0.000723355	9028800	9114400	8574000	8000900	8368200	7505000
Gm15800	-1.24541	0.00682707	1204800	1251400	1219800	1071600	1146000	1066900
Gbas	-1.24515	0.00250156	61229000	60234000	55419000	55923000	54718000	47617000
Hnrnpul1	-1.24469	0.000423456	15457000	15639000	13397000	13831000	13680000	12215000
C1galt1	-1.24461	0.0177956	1199500	1167900	1032700	1067500	1125400	859580
Pdhb	-1.24426	0.000737858	102280000	102280000	88008000	90817000	87822000	82458000
Napa	-1.24405	0.00122746	74806000	75706000	68672000	68043000	65092000	62763000
Hprt1	-1.244	0.00869188	92872000	92229000	77479000	83901000	82633000	68424000
N6amt1	-1.2438	0.0108117	756370	781490	592480	618380	671270	603390
Lactb	-1.24347	0.00360225	34243000	33940000	29500000	30617000	31106000	25767000
Mtm1	-1.24337	0.0029155	8740600	8396200	8083700	7386900	7983700	7201900
Pdcd4	-1.24259	0.0167438	1374100	1643200	1199800	1254700	1329700	1164800
Stim1	-1.24255	0.00348289	1949500	1899700	1685300	1670100	1633100	1641600
Snx5	-1.24249	0.000901338	135170000	133870000	118640000	119120000	115750000	111710000
Naga	-1.24206	0.00814015	8121900	8909500	7899100	7139300	7603000	7563300
Ampd3	-1.24198	0.0165565	62546000	63052000	59296000	59880000	59150000	47424000
Tsr1	-1.24195	0.00297327	7198100	7190000	6119400	5901200	6741700	5719200
Man1b1	-1.24194	0.0132253	5356500	5738200	5271600	5374300	4994100	4337200
Rhot2;Gm20683	-1.2419	0.0119888	4564800	4522900	4200600	4386200	4024600	3529800
Araf	-1.24189	0.0011812	3331100	3357400	2808200	2937700	2975800	2581300
Hps6	-1.24189	0.00341461	3109200	3088100	2947600	2788800	2734900	2666100
Gid8	-1.24183	0.00200123	11287000	11145000	9413400	9932100	9910800	8644900
Tfam	-1.2417	0.000414412	22333000	22120000	19169000	19088000	20307000	17561000
Tnfaip2	-1.2416	0.000666386	22726000	22926000	20415000	20774000	20305000	18130000
Psmb9	-1.24136	0.00339293	7833600	7366300	6539700	6743900	6527900	6166700
UPF0598	-1.24104	0.011985	1882000	2130000	1821000	1907300	1728000	1594600
Pccb	-1.24095	0.00492491	36146000	34021000	29832000	31300000	31303000	26963000
Dph2	-1.24094	0.00735628	2073900	2286600	2114000	1905700	1978400	1914800
Ap5z1	-1.24092	0.000217483	5030300	5242900	4445600	4517200	4643100	4025600
Ndufaf4	-1.24084	0.00470966	5069300	5280900	4623100	4872600	4496800	4068900
Hltf	-1.24055	0.0194011	1187900	1018500	969080	951400	1021600	869560
Ganab	-1.24044	0.00125436	153920000	151000000	131190000	131310000	140770000	118940000
Atp6v0d1	-1.24014	0.017174	72972000	70190000	67080000	69597000	63973000	55681000
Blvrb	-1.23961	0.0122406	255520000	245300000	229190000	230710000	209230000	215020000
Slc44a1	-1.23955	0.000999262	8898900	8476500	7728000	7623600	7907200	6987500
6430548M08Rik;Kiaa0513	-1.23953	0.00353158	3404400	3466800	3201900	3200200	3162200	2698600
Pfdn1	-1.23831	0.00547295	33869000	32617000	30963000	29844000	28876000	28766000
Seh1l	-1.23823	0.00203985	5181200	5447700	4797700	4792800	4553300	4498200
Nit2	-1.23773	0.00031624	27593000	26934000	23970000	23987000	24185000	22286000
Pak1ip1	-1.23764	0.00598222	1983300	1871600	1613900	1731600	1660100	1512800
Ppp1cc	-1.23709	0.0186041	2075100	2224300	1941400	1811000	1829100	1966300
Ap5b1	-1.23689	0.000483694	1866000	1843800	1706400	1617300	1694700	1557800
Pik3r2	-1.23688	0.0206419	2681700	2609600	2452900	2433700	2187900	2344600
Dync1h1	-1.23677	0.00282974	1096800000	1093800000	982540000	1000800000	1012100000	846550000
Ccnh	-1.2366	0.0185855	535520	548460	448760	443140	451870	479040
Tmed9	-1.2365	0.0206136	79038000	73376000	67323000	69473000	72407000	56498000
Plcg2	-1.23639	0.0012401	90667000	91570000	84008000	82524000	85065000	72345000
Cdk2	-1.23599	0.000392215	3056400	3094100	2667500	2612000	2853900	2466500
Gstt2	-1.23586	0.0014997	9872000	10442000	9513400	8923300	9694100	8265100
Map2k4	-1.23552	0.00852852	4419100	4593100	4158500	4255800	4189600	3454000
H1f0	-1.23541	0.0208394	40130000	39642000	33740000	32337000	39508000	30665000
Bckdha	-1.2354	0.0168842	10970000	12171000	10770000	10159000	9867200	10470000
Smc3	-1.23504	3.3136e-05	21991000	22814000	19486000	19229000	20063000	18511000
Bloc1s4	-1.23498	0.00421061	2101600	2138600	1939400	1778500	1917900	1867100
Rasa1	-1.23469	0.006403	23444000	22286000	20225000	20598000	21394000	17531000
Nop56	-1.23465	0.00144277	40693000	41377000	35292000	36444000	34975000	34088000
Rap1gds1	-1.23444	0.00666407	64347000	63717000	56564000	59266000	58892000	48613000
Rrp9	-1.2342	0.00255825	4986000	5480900	4436300	4708400	4524900	4165600
Trappc9	-1.23413	0.0116635	5936100	5922700	4976500	5432900	5371600	4389300
Commd1;Gm28048	-1.23409	0.00642923	4724500	5087500	4271100	4530800	4108300	4038200
Sel1l	-1.23403	0.000945597	6911000	7071300	6500400	6403800	6437300	5643300
Pfn1	-1.23397	0.0116254	837090000	858220000	749490000	809450000	758460000	642350000
Ano6	-1.23384	0.00438667	20440000	20208000	17479000	17908000	19082000	15479000
Znf598	-1.2338	0.0212468	3346800	3264200	2789700	3099000	2675400	2693500
Psma2	-1.23349	0.0010471	108890000	108350000	97907000	94559000	96088000	93222000
Erap1	-1.23328	0.00160698	45450000	48382000	41860000	43098000	42572000	36809000
Cpt2	-1.23314	8.07961e-05	41302000	41373000	37521000	36422000	37691000	34277000
Hnrnpf	-1.23305	0.0020508	105510000	103140000	87665000	92930000	90597000	83176000
Adprm	-1.23304	0.00524766	1373900	1449500	1186000	1140000	1274700	1193100
Hnrnpul2	-1.23296	0.00049687	99041000	100120000	91190000	89588000	92624000	80012000
Fdx1l	-1.2327	0.00270609	1833500	1794300	1554600	1569600	1699300	1408800
Ptms	-1.23229	0.000917578	18739000	18716000	15691000	15800000	17000000	15067000
Gga1	-1.23228	0.00905586	46019000	43466000	37236000	38943000	41418000	33961000
Rrm1	-1.23206	0.00370146	7085000	7684600	6094800	6111000	6802700	5873100
Csf1	-1.23186	0.00993409	42155	38782	36795	37371	37372	31708
Inpp5b	-1.23163	0.00846012	4254100	4369500	4136700	4094600	3772800	3666200
Mlycd	-1.2315	0.000584691	2360400	2486500	2126000	2109100	2272800	1918000
Rps16	-1.23118	0.00103616	272400000	269040000	237820000	241670000	250020000	212710000
Sympk	-1.23088	0.00132725	8408000	8631600	7740400	7674100	8037400	6720900
Sumo1	-1.23048	0.00333669	5625300	5209700	4693200	4768200	4822500	4418200
Hdac10	-1.23032	0.00129488	606990	587740	506480	525520	524480	484400
Eif4e2	-1.23013	0.00504751	4554100	4435100	4046200	4215000	3901200	3674100
Dock2	-1.23011	0.000500935	68412000	70021000	61985000	62913000	63411000	55026000
Ifi47	-1.23009	0.0179053	8961300	9226000	8854100	8901600	8469100	7179600
Src	-1.22978	0.00491817	112440000	113750000	100770000	105240000	104190000	86977000
Fmnl1	-1.22968	0.000293121	52331000	53545000	46272000	47874000	47232000	42437000
Exoc7	-1.22967	0.000533422	34480000	34278000	31741000	30987000	31097000	28815000
Tpm3-rs7	-1.22952	0.0173744	550720000	541600000	439450000	479440000	504050000	401580000
Scrn3	-1.2295	0.00298073	974040	989750	895010	880370	850970	852750
Nploc4	-1.22928	0.000264327	37395000	36629000	32951000	32186000	33926000	30621000
Psmg4	-1.2292	8.17366e-05	1154700	1157700	1000200	1013900	1046600	933660
Rnf31	-1.22891	0.00960112	3181800	3200600	2907800	2788200	3171200	2483300
Nop10	-1.22858	0.0174652	4510900	5176900	4862400	4407600	4636000	4123900
Usp9x	-1.22847	0.000532451	65102000	65223000	57800000	59275000	59019000	52078000
Tcerg1	-1.22842	0.000377118	19061000	19098000	16399000	16905000	17312000	15143000
Pld1	-1.22798	0.000722692	4564400	4826200	4280300	4310400	4297900	3782800
Arih2	-1.22759	0.0010322	4620100	4707800	4111700	4276500	4221200	3685300
Psmd14	-1.2273	0.00450625	40065000	40064000	34361000	36188000	37116000	30569000
Twf1	-1.22713	0.00585194	131940000	139340000	119060000	125640000	125330000	103520000
Ntmt1	-1.22705	0.00219514	2848300	2822300	2619300	2643400	2537900	2337800
Vbp1	-1.22653	0.00107741	26859000	27052000	22723000	23948000	24283000	21174000
Iars	-1.2265	0.00562512	170540000	172230000	147770000	155490000	159950000	130170000
Renbp	-1.22647	0.000765168	38793000	42303000	35155000	36169000	36940000	32210000
Usp15	-1.22619	0.00327567	39861000	39682000	35473000	36411000	37208000	30916000
Snx30	-1.22584	0.0122527	607110	681320	587560	597440	547500	555120
Ppcs	-1.22583	0.00521369	5950000	5874600	5164900	5511600	5342300	4581000
Ppa1	-1.22576	0.0142913	87113000	86007000	75694000	77307000	84342000	64999000
Cnnm3	-1.22554	0.0112287	1586800	1739500	1477000	1425100	1434800	1490600
Hnmt	-1.22535	0.0137332	23916000	26319000	24942000	22029000	24578000	21690000
Ube4b	-1.22532	0.000754092	17171000	18064000	15313000	16064000	15772000	14024000
Ctnna1	-1.22526	0.0248209	4591400	4225400	3407400	3818300	3822700	3388300
AI607873	-1.22522	0.000855287	12286000	12781000	10753000	11383000	11040000	10053000
Rbm12;Gm28036	-1.22514	0.00679976	5598500	5124200	4532600	4739300	4795600	4281600
Taldo1	-1.2251	0.000747247	1111400000	1125400000	982120000	970790000	1058900000	894360000
Nsun2	-1.22508	0.000236144	79379000	79519000	70505000	68588000	74233000	65424000
UPF0488	-1.22501	0.00444959	567850	540330	465690	478200	481160	464910
Sphk1	-1.22476	0.0120216	544330	606370	534480	513820	569080	451920
Bckdk	-1.22469	0.000910027	6575500	6876600	6287100	6161400	6088300	5678100
Stxbp5	-1.22446	0.0064311	3819100	3866900	3701200	3558200	3424600	3362500
Akr1a1	-1.22428	0.00402241	461350000	463510000	428590000	423050000	444220000	365730000
Pank4	-1.22426	0.00257449	1557000	1758500	1419100	1473900	1458900	1355100
Hist3h2bb;Hist3h2ba;Hist2h2be	-1.22408	0.00784805	1100200	1045800	1006700	918360	1038400	911350
Ldlr	-1.22407	0.0047687	3818200	3707100	3344600	3450200	3519200	2925700
Mon2	-1.22395	0.000716975	8537500	8419400	7706100	7661500	7589500	7150200
Nln	-1.22335	0.00217599	40725000	40555000	35373000	36632000	37850000	31671000
Spr	-1.22326	0.000793657	57697000	60746000	52691000	54556000	52469000	48507000
Tiam1	-1.22326	0.00750501	258100	236670	207040	210480	224630	201100
Tmed1	-1.22315	0.00178028	5219500	5294800	4642600	4893100	4666700	4225500
Ehhadh	-1.22289	0.0122946	455010	443350	433340	392450	412180	406650
Marchf5	-1.22274	0.00391189	1277400	1383600	1196600	1230900	1242500	1041000
Wdr45b	-1.22219	0.00261915	708760	755920	659880	688230	657340	589060
Ssh3	-1.22218	0.00748305	3603300	4219100	3359100	3432400	3427400	3272200
Ywhae	-1.22126	0.0121258	523750000	500800000	427460000	457160000	478270000	387440000
Cox11	-1.22125	0.0220956	193710	173720	177480	170860	176230	149860
Cyc1	-1.22114	0.00842614	66918000	66261000	61515000	62840000	63053000	52026000
Gba	-1.22096	0.00229176	19318000	19711000	18736000	17460000	18394000	16795000
Ddx5	-1.22078	0.00285967	254350000	245800000	209720000	216840000	230950000	198040000
Ubtf	-1.22065	0.0275984	501730	525600	402810	436290	486150	378950
Nup133	-1.21999	0.00198643	6870600	7310400	5862000	6310300	6261400	5647700
Snx10	-1.21991	6.24152e-06	20088000	20809000	18405000	18243000	18871000	16940000
Rab2a;Rab2b	-1.21986	0.000639033	75408000	73999000	66443000	65786000	70324000	60757000
Myof	-1.21958	0.000679215	494430000	485970000	432920000	443720000	450830000	394500000
Clic1	-1.21953	0.0213737	240130000	226890000	195170000	212360000	218500000	173880000
Ormdl2	-1.21911	0.000863282	945380	960870	854430	861190	840770	814160
Hook3	-1.2187	0.00196423	29431000	29850000	25691000	27026000	27384000	23186000
Surf1	-1.21837	0.00456529	2733900	2859100	2501000	2612600	2613600	2178400
Aqr	-1.21823	0.00854987	11285000	11371000	10421000	10663000	9751700	9789400
Exosc9	-1.21814	1.98509e-05	9382000	9619300	8288900	8458900	8701400	7737800
Hmbs	-1.21812	4.30671e-05	41112000	41428000	36855000	36461000	38413000	34126000
Vps26a	-1.21801	0.00391362	41967000	44288000	37968000	39326000	40855000	33452000
Samd4b	-1.21798	0.00766039	1473600	1541700	1496700	1411300	1415100	1296800
Qpctl	-1.21789	0.0220197	1566800	1451600	1393900	1336700	1317100	1371800
Hnrnph1	-1.21744	0.018764	19544000	19123000	16452000	17888000	15929000	16458000
Npepl1	-1.21741	4.74289e-05	22023000	22042000	19747000	19651000	20247000	18376000
Crot	-1.21741	0.00363854	18526000	18022000	15608000	15825000	17355000	14472000
Ppp1cb	-1.2171	0.000545133	6996100	7294400	6411600	6551100	6633200	5747700
Ubr1	-1.21702	0.00931984	2134900	2121400	2027600	1990700	1878400	1874800
Zadh2	-1.21676	0.00865068	19070000	20357000	17928000	19026000	17880000	15629000
Mdh1	-1.21672	0.0156859	788340000	741590000	643440000	670570000	733260000	584450000
Cpsf3	-1.21616	0.000138958	8335200	8373100	7415500	7299800	7828800	6928300
Rer1	-1.21606	0.00704239	20796000	19854000	18659000	18751000	19466000	16152000
Commd3	-1.21577	0.00271514	32609000	31065000	28926000	29207000	28665000	26804000
Cbr2	-1.21569	0.00633553	11215000	10434000	9147500	9753400	9686600	8677900
Pter	-1.21558	0.00111808	21770000	21503000	20137000	19906000	20024000	18118000
Sms	-1.21532	0.000832972	51632000	51780000	45112000	45094000	49099000	41763000
Txnl4a	-1.21522	0.0267561	2479100	2489900	2081300	2336900	2305900	1828400
Hgs	-1.21518	0.0155779	47174000	45467000	40151000	43039000	43741000	35082000
Yars2	-1.215	0.00933999	6720800	6708800	6071700	6444600	5809100	5610800
Ecm29;AI314180	-1.21498	0.00652966	59411000	59489000	52357000	55060000	56178000	45902000
Rtcb	-1.21497	0.000578948	71806000	70699000	60906000	63449000	64649000	57841000
Apmap	-1.21491	0.00329675	17386000	17067000	14986000	15822000	14956000	14421000
Top1	-1.21446	0.00189542	58881000	58540000	51209000	54157000	53683000	46645000
Gbf1	-1.21433	0.000931509	15229000	15655000	14058000	14410000	14174000	12611000
Rps3a	-1.21371	0.00299278	770520000	739310000	647680000	665700000	708780000	601890000
Dtx3l	-1.21362	0.00289169	7219400	7069700	6672500	6546000	6464200	6195900
Cdk9	-1.2136	0.0165195	3319400	3095400	2696500	2924300	2979700	2448200
Dnmt1	-1.21355	0.00634149	11587000	11899000	10492000	9879600	10755000	10483000
Tmlhe	-1.21324	0.006174	21098000	21495000	19983000	18272000	20975000	18222000
Dhx30	-1.2129	0.00315497	6599400	6519300	5615200	6073000	5850200	5244500
Capza2	-1.21271	0.00017792	57794000	59130000	53303000	53595000	54044000	48526000
Kiaa1033	-1.21234	0.00366691	13458000	13740000	12938000	12787000	12930000	11176000
Cul5	-1.21224	0.00336267	29134000	30696000	26548000	28314000	27022000	23971000
Rab1A	-1.21219	0.00121256	4928300	4873200	4141300	4269400	4552900	3953400
Magoh	-1.21204	0.00531489	19528000	19277000	17194000	16314000	18845000	16272000
Thoc2	-1.21193	0.000602508	9465700	10082000	8890900	8802400	8846400	8424400
Lpgat1	-1.21183	6.46178e-05	4697700	4905200	4261700	4356000	4340700	4016300
Skp1	-1.2116	0.00658132	75157000	73010000	65594000	66646000	71839000	58169000
Ccdc51	-1.21144	0.00671089	3583000	3367300	3287400	3224200	3276500	2906100
Arpc4	-1.21138	0.00195749	197510000	206480000	184120000	190920000	182720000	166640000
Cryl1	-1.21076	0.022492	27793000	27865000	24414000	25616000	27391000	20894000
Ube3a	-1.2107	0.00205411	28140000	28300000	24389000	26009000	25908000	22351000
Sf3b1	-1.21058	0.00302721	53992000	54728000	47153000	50306000	50324000	42690000
Sephs2	-1.21056	0.00412316	3051700	3195600	2677600	2739100	2713200	2725700
Adnp	-1.2104	0.000641154	174820	174400	155530	152070	160740	150540
Fmo5	-1.21012	0.00192022	625640	636640	534960	542560	562590	542130
Iars2	-1.20975	0.000459663	101770000	102730000	93016000	89800000	97303000	86510000
Nudc	-1.20945	0.0171768	107880000	103150000	84831000	94266000	96689000	80569000
Iah1	-1.20923	0.023649	23738000	23233000	21288000	21678000	19838000	21248000
Iqgap2	-1.20879	0.0036215	25094000	25172000	22392000	22030000	24668000	20279000
Iws1	-1.20874	0.0112818	3825500	4460200	3580300	3722300	3910900	3269900
Rnf2	-1.20871	0.0184354	711210	728460	622970	698550	651780	552430
Uqcrc1	-1.20854	0.0242563	222940000	212480000	206470000	215200000	203610000	174040000
C3ar1	-1.20843	0.00567778	296600	297800	237950	253340	267800	241600
Ifrd2	-1.2082	0.00867862	708710	791990	648110	687910	644970	639750
H6pd	-1.20747	0.00147665	50380000	50501000	45957000	44283000	48971000	42147000
Mapk9	-1.20744	0.00228571	6110800	6566800	5711600	5883500	5989000	5085300
Sf3b3	-1.20676	9.83864e-05	57633000	59350000	51388000	52528000	54895000	47734000
Dnajb4	-1.20675	0.0107058	3480200	3492600	3360700	3168600	3507700	2878100
Acot9;Acot10	-1.20614	0.00239054	43947000	44222000	39672000	40016000	42703000	35388000
Dlg1	-1.20577	8.65909e-05	8507100	8537100	7667900	7734400	7953100	7106700
Tmem87a	-1.20575	0.00318469	2561000	2531000	2184600	2369800	2265900	2070300
Kpna1	-1.20573	1.74531e-05	33112000	33568000	29764000	29816000	30850000	28239000
Cap1	-1.20573	0.00860454	618290000	648340000	565950000	598990000	602710000	493370000
Ddx39a	-1.20434	0.00242717	8217400	8654800	7948200	7740100	7751900	7422600
Cyp4f16;Cyp4f17	-1.20431	0.000382931	1826400	1872300	1653100	1611000	1745000	1584300
Gsto1	-1.20426	0.0100701	201430000	200230000	173950000	192350000	174730000	164490000
Cecr5	-1.20416	0.00016422	2349700	2336900	2079900	2135400	2155800	1955400
Dnajc9	-1.20377	0.00963671	328190	358290	287060	285120	314060	297410
Vps4b	-1.20269	0.000471463	59665000	58865000	52683000	53672000	55919000	48770000
Hars2	-1.20265	0.00209873	8165000	7936700	7159100	7320000	7215600	6948700
Trmt6	-1.20265	0.0042412	4019200	3965400	3389700	3702300	3512300	3286800
Phyhd1	-1.20235	0.0111356	5439300	5036900	4921700	4693000	4909900	4633100
Ikbkb	-1.20222	0.000192671	21129000	21130000	18940000	19204000	19919000	17507000
Srbd1	-1.20192	0.000257728	492150	496070	422610	443450	447920	411710
Tk2	-1.20102	0.00642392	335750	336150	319020	323340	307560	287600
Kcnab2	-1.20059	0.000930147	40108000	40207000	35736000	37358000	37466000	32742000
Gcfc2	-1.20035	0.00785792	252550	292600	245120	239060	255300	236150
U2surp	-1.20024	0.00155454	14117000	14920000	12595000	12618000	13204000	12672000
Rif1	-1.20021	0.00686212	1495000	1467100	1299000	1276200	1463400	1214300
Col1a1	-1.20001	0.0162913	12102000	11777000	9957700	10548000	11612000	9227800
Acot7	1.20015	0.000419312	43305000	45758000	39235000	57730000	61148000	52390000
Ppp2r5a	1.20027	0.0018112	5891400	6243300	5735100	7907300	8394700	7562500
Prkar2b	1.20056	0.0232067	17295000	18334000	15872000	21636000	23187000	23891000
Tor2a	1.20097	0.018765	861650	875560	770070	1066900	1119900	1159000
Camsap1	1.20111	0.000953213	197170	206810	180170	253260	280910	246250
Prpf3	1.20115	0.00128352	6492200	6973200	6191700	8733300	8985500	8519000
Stambp	1.20156	0.00518578	4588300	4849200	4253100	6348800	6584900	5403700
Ripk3	1.20181	0.00761416	8177200	9154300	7955800	11658000	12085000	10098000
Srsf3;Gm12355	1.20196	0.0131383	17601000	17869000	14806000	21115000	24925000	21146000
Pdlim5	1.20207	0.0107528	26258000	25385000	22227000	31289000	34309000	32992000
Arpc1b	1.20228	0.0103195	195150000	194190000	180600000	240130000	269230000	253180000
Dak	1.20252	0.00306558	6062500	6049600	5638600	7690900	8339600	7715900
Lrrfip2	1.20311	0.0105524	3285200	3172000	2836000	4058900	4154300	4200300
Pycr2	1.20321	0.0103806	3514500	3598200	3058500	4258300	4775200	4559600
Med21	1.20354	0.0163673	604720	649730	533280	749270	824810	813390
Rps23	1.20404	0.00753094	39592000	41094000	35385000	49774000	58129000	47796000
Mrpl40	1.20411	0.00721787	979770	1077400	910150	1363700	1297200	1304800
Smarce1	1.20506	0.000733351	4130300	4332700	3582000	5565700	5508500	5034900
Alg5	1.2053	0.0234935	4934100	5846900	4713900	7082300	7581900	6102700
Plcb3	1.20605	0.010004	3448500	3674000	3403200	4498900	4960400	4664500
Dhrs7b	1.20756	0.00303152	10740000	10689000	9987500	13831000	15310000	13121000
Iqsec2	1.20765	0.00960536	375330	382000	373360	496580	529550	493400
Cdkn2aip	1.20798	8.34468e-05	618150	655900	577390	840710	868430	777810
Rilpl2	1.20803	0.0251481	2173200	2127600	2149800	2922400	2858100	2887300
Fam96a	1.20848	0.0033576	1882600	1972100	1760800	2622400	2694200	2247300
Nudcd3	1.20875	0.0140721	6866500	7470600	6587700	9560000	10459000	8213700
Kpna6	1.20888	0.016055	7949900	8523000	8103700	10596000	11487000	10967000
Coro7	1.20909	0.00133775	64959000	70318000	59166000	90787000	91249000	79357000
Dpy30	1.20966	0.0103625	7532700	8018700	6986600	9730500	10211000	10346000
Bag6	1.20996	0.00688009	8240400	8417400	7072900	11135000	11463000	9369800
Apbb1ip	1.21086	0.000627935	29075000	28948000	24859000	36697000	39591000	35187000
Fabp4	1.21116	0.000469537	10555000	10633000	9799600	14159000	14655000	12959000
Agpat5	1.21122	0.0239666	4148400	4004500	4188100	5579500	5752200	5301100
Csnk1g3;Csnk1g2	1.21127	0.00476316	1346500	1358600	1310500	1777700	1915600	1721800
Eif2b5	1.2115	0.0121868	6181700	6683400	5720100	8570900	9277700	7272900
Tbc1d9b	1.21184	0.0081813	3692200	3907500	3539900	4891100	5044500	5069300
Mapkapk2	1.21192	0.0139628	34173000	37162000	34755000	45457000	51272000	46389000
Myl6	1.21223	0.0064091	317650000	345530000	282660000	415800000	471860000	387650000
Ccny	1.2124	0.000548784	3110400	3343500	2850900	4142800	4311400	4071000
Mmab	1.21441	0.0183296	1638500	1538700	1481100	2012800	2141400	2135200
Ndufaf5	1.21549	0.0025603	1612300	1772600	1513400	2258700	2374900	1992700
Dmxl2	1.2156	0.00390961	1595700	1567700	1426600	2061400	2074100	2063300
Prkcsh	1.21626	0.0041566	59630000	64858000	51917000	76658000	85501000	75851000
Fam50a	1.21632	0.000390651	6575900	6969700	6137400	8777800	9519900	8336500
Gatb	1.21653	0.00234594	915570	936680	845390	1167400	1294400	1188800
Parp3	1.21685	0.000616019	6581500	6612600	6097500	8793900	9268900	8073100
Psmb10	1.21751	0.00945378	14400000	14569000	13900000	18507000	20284000	19294000
Mpp1	1.21763	0.00227248	57642000	64052000	56131000	79140000	84100000	77355000
Acbd5	1.21781	0.0054917	4871200	4549000	3997300	6113700	6485100	5552600
Trim28	1.21847	0.000358702	27613000	28722000	23661000	36209000	37891000	34051000
Ate1	1.21852	0.00275151	4166200	4761400	4021500	5956300	6079500	5485300
Raph1	1.21924	0.000962224	5982900	6239700	5076700	7893400	8262500	7248100
Cdk2ap1;Cdk2ap2	1.21943	0.0262214	232900	250490	240880	355780	320370	307680
Copz1	1.2195	0.00307766	26017000	28206000	25169000	35036000	39115000	33638000
Aimp1	1.21988	0.000137657	52859000	57177000	48812000	72135000	75673000	67511000
Fam129a	1.21997	0.00796588	24408000	27255000	24562000	36471000	34959000	32023000
Trim56	1.22026	0.00587929	2343400	2612800	2191400	3147400	3291300	3238900
Nit1	1.22049	0.0173846	7823200	7819300	6631700	10745000	9549200	9891300
Grpel2	1.22064	0.000375978	189130	191130	171810	248940	256720	243240
Cars2	1.22154	0.0176113	659320	777390	682830	934930	990570	947970
Strip1	1.22161	0.00941685	3620100	4038800	3636800	4892300	5460000	4994000
Atp5b	1.22236	0.00200265	723570000	748850000	667260000	968910000	973100000	963880000
Unc45a	1.22255	0.0029717	7426900	7881000	7220900	10666000	10741000	9276300
Myo5a	1.2227	0.000402742	64180000	68927000	60567000	87931000	93740000	81770000
Nrbp1	1.22378	0.000908953	9557300	10454000	8887100	13041000	14125000	12159000
Serpinb9	1.22386	0.0103515	14495000	15149000	14678000	19533000	21046000	19780000
Sbf2	1.22437	0.0282928	187950	222050	182460	259590	266580	277940
Dnajc1	1.22451	0.00114993	7073500	7194600	5916100	9042400	9655100	8713600
Coro1a	1.2248	0.00507421	122850000	135170000	121630000	167990000	178800000	170020000
Atp6v1h	1.22528	0.000363561	358750000	372740000	337150000	479410000	514630000	462590000
Akap13	1.22533	0.00441187	2245700	2518200	1981200	3188500	3117100	2854000
Tmem126a	1.22619	0.0107704	268250	274770	248450	333670	397790	350050
Mdn1	1.22623	0.000806311	2700100	2772200	2375800	3747500	3698500	3255700
Rdh13	1.22684	0.0250532	9351700	10190000	10198000	13842000	14269000	12504000
Emc4	1.2271	0.0153123	5149300	5552000	4867500	7277200	7956000	6111300
Scaf8	1.22711	0.0273219	216630	225030	182840	295760	265250	288920
Pikfyve	1.22812	0.0140819	2486200	2399300	2340200	3184300	3342400	3343500
Oat	1.22821	0.0170508	79074000	83067000	77332000	104730000	109560000	112880000
Pdp1	1.22861	0.0147107	1161500	1243600	1149100	1541300	1658100	1657700
Pgam5	1.22865	6.45439e-05	15456000	16179000	13847000	20970000	21991000	19166000
Rbbp5	1.22878	0.00496123	1452700	1650500	1459300	2086600	2128700	2011300
Gsn	1.22985	0.00159376	400340000	407290000	360860000	524410000	586550000	489730000
Serpinb6b	1.22986	0.0105952	14368000	14471000	12965000	18731000	21724000	16960000
Hsd3b7	1.23051	0.0197507	5331500	6251700	5298900	7393000	7797900	7855500
Cfp	1.23083	0.00616796	12975000	13140000	11738000	16978000	17182000	17604000
Ap2s1	1.231	0.00701349	14010000	13926000	11193000	18485000	18817000	16118000
Ptpn22	1.23119	0.00127608	1307300	1392200	1180700	1780400	1929700	1606400
Dhdh	1.23156	0.00268367	9281300	10071000	8960200	13249000	12893000	12604000
Psd4	1.23213	0.00193176	2146900	2359300	1952400	3104200	3041500	2696200
Sh3glb2	1.2333	0.000747122	18267000	19679000	17538000	26078000	25878000	24118000
Zfyve16	1.23404	0.000465942	1889800	1926900	1707800	2595400	2697400	2297400
Eif3g	1.23417	0.000747452	17143000	17522000	16049000	24227000	23967000	21479000
Utp15	1.23541	8.47468e-05	4673000	4795100	4314100	6326400	6540900	6061500
Sec24b	1.23608	0.000403705	11827000	12630000	10842000	16168000	17452000	14918000
Rrs1	1.23615	0.00425958	3273700	3672200	3147300	4466700	4814600	4573500
Chd1	1.23619	0.00254722	580030	664400	544640	840260	836960	775900
Ddx28	1.23646	0.00326291	764090	723970	696660	993280	1044200	966640
Gtf2f1	1.23685	0.0116742	3454000	3573500	2985100	4221800	5049900	4499800
Rfx1	1.23711	0.0136899	628400	712410	574130	889380	848480	887400
Hdlbp	1.23729	0.0007247	164590000	172770000	152680000	217930000	238030000	218170000
Ubxn6	1.23752	0.000498408	7660300	7989400	7354000	10616000	11092000	9969400
Med15	1.23762	0.0137841	231220	260390	200800	342610	324560	283630
Stt3b	1.23813	0.00215783	10419000	11242000	10188000	14390000	15826000	13687000
Tcp11l2	1.23815	0.0101411	460700	544090	461520	654560	731410	631200
Mta1	1.23819	3.78043e-05	2770500	2881700	2530800	3725600	3981400	3558600
Cdk5	1.23878	0.000745979	10263000	11124000	9630200	13948000	15320000	13460000
Flnb	1.23987	0.000879123	105340000	106870000	90948000	137230000	151530000	129150000
Coq6	1.24001	0.00171902	4118100	4248100	3930900	5548400	6144800	5292300
Cct7	1.24004	0.00930534	183930000	189100000	169450000	230440000	270870000	247780000
Lars	1.24052	0.00171098	143760000	143060000	126530000	189260000	208890000	172920000
Gart	1.24144	0.00121236	49398000	52147000	45025000	65972000	74076000	62487000
Fgd6	1.2426	0.00343747	1319500	1344900	1118800	1781700	1897600	1550600
Kif1b	1.24344	0.00840975	5855700	6371200	5763200	7867100	8655300	8353900
Vezt	1.24388	0.00383657	477050	482070	420870	649390	621600	635070
Tufm	1.24412	1.15912e-05	239060000	250380000	218570000	333650000	340690000	304990000
Ccrn4l	1.24736	0.013045	135270	146530	123280	187380	180000	193500
Nucb2	1.24842	0.00229091	19770000	22036000	17912000	26742000	29067000	26881000
Eftud1	1.24875	0.0162167	9575600	10676000	9212900	12816000	13884000	14184000
Smap2	1.24923	0.00095014	6239000	6840600	5713500	8763600	9383900	7955100
Dab2	1.24953	0.0028776	24433000	22880000	20318000	30625000	32987000	30187000
Lpcat4	1.24968	0.000638111	299950	299330	274770	398880	420710	394860
Arl3	1.24979	0.000269492	3031900	2977200	2703300	4143600	4215400	3753100
Stx6	1.25074	0.00844124	299520	346310	312210	443800	475930	412860
Letm1	1.25179	0.000113405	60216000	64295000	55789000	85344000	85468000	79932000
Bet1	1.25293	0.00292513	2317200	2615000	2163700	3409400	3513700	2962600
Yars	1.25316	0.000539037	80280000	82123000	69922000	112470000	113150000	98100000
Dhx16	1.2532	0.00253045	1184700	1266400	1159300	1717700	1676300	1636100
Rpl36	1.25323	0.00283664	87796000	91572000	84155000	119420000	135270000	113450000
Fanci	1.2535	0.0114976	795040	888150	716050	1051200	1141200	1142400
Fam63a	1.25394	0.0129215	13711000	15683000	14582000	20605000	22150000	18641000
Atg4b	1.25454	0.0096905	6370900	6812600	6552300	9618500	9775300	8219200
Ahcyl1	1.25494	0.000384724	30281000	31096000	27631000	41892000	44705000	37785000
Atad3	1.25522	2.67016e-05	32631000	34302000	30395000	45498000	47455000	42884000
Ppp1r10	1.25553	0.0252522	1163500	1309900	1071800	1641500	1920000	1411600
Rgs14	1.25604	0.0211701	2381400	2488100	2405800	3245900	3386100	3536900
Stau1	1.25622	0.0274865	1447700	1421200	1389800	1955500	2316600	1722000
Cdc5l	1.25661	0.000720722	9446800	9750700	7991400	12612000	12995000	12265000
Csk	1.25686	0.000801906	33111000	34473000	32020000	46196000	49377000	43782000
Apobr	1.2576	0.000824255	49778000	53511000	43472000	68572000	73436000	62940000
Rbmx	1.25841	0.0101022	1473200	1641200	1457400	2225400	2338300	1857100
Aimp2	1.25881	0.000724637	26755000	27513000	24915000	36405000	40253000	34355000
Mecp2	1.25886	0.00329643	5864400	5884200	5499600	7691600	8496100	7973000
Fubp1	1.26017	0.0101992	20292000	21666000	18977000	29380000	27062000	28897000
Mvp	1.26061	0.00142648	774970	811690	710120	1051500	1090300	1074200
Sec16a	1.26127	0.0107887	3138600	3526300	3031600	4187300	4919600	4497200
Gsn	1.2616	0.0166218	1962500	1949500	1699300	2370100	2960400	2560600
Psmd9	1.26199	0.0049103	6533400	7117200	5453000	9032700	8969800	8656200
Rpn1	1.26243	0.0016493	170840000	173420000	147030000	239670000	245380000	205090000
Acat2;Acat3	1.26343	0.011876	9864500	9942600	9041100	12321000	14705000	13584000
Gda	1.26367	3.35133e-06	56582000	57415000	50036000	77400000	80053000	72851000
Mrps35	1.26383	0.0034571	6264500	6784200	6157200	9298300	9717500	8045200
Adprhl2	1.2641	0.00549307	2707800	3084900	2624700	3797200	4367200	3675300
Abca1	1.26434	0.000776844	3984500	4167000	3486800	5703200	5452100	5178900
Dnajc2	1.26487	0.00123619	4713000	4992100	4173800	6228100	6940600	6326400
Cdc73	1.26583	0.00128831	1452800	1414100	1220300	1900200	2079800	1770700
Gramd1a	1.26676	0.00303885	465450	524070	431220	675320	662180	658040
Rpl9	1.26725	0.00120631	162920000	183200000	152780000	236030000	251380000	215240000
Vav3	1.26745	0.00237349	4349100	4625100	4168700	6283900	6113300	6116600
Hnrnpk	1.26802	0.000912955	130060000	132850000	107750000	172980000	181430000	166440000
Necap2	1.26895	0.00374253	17117000	17148000	16190000	22601000	25198000	23463000
Cybb	1.269	0.000129426	149090000	152510000	137750000	210070000	219660000	190890000
Rdx	1.26914	0.00252603	67624000	76070000	67353000	97112000	104880000	95694000
Chmp4b	1.27006	0.00337195	74351000	76796000	65378000	99061000	114650000	92662000
Arfgap1	1.27047	0.00283119	10087000	9712800	8183200	12954000	14285000	12227000
Maip1	1.27098	0.00391	1728800	1999200	1690200	2615800	2549100	2475400
Srsf10	1.27178	0.000894651	6115500	6443500	5755100	8321400	9211600	8374600
Cox5a	1.27213	0.0218657	113740000	105840000	113050000	156260000	173380000	142320000
Nol6	1.27218	0.00435693	1518000	1600500	1352600	2020000	2139100	2154900
Nup214	1.27327	0.000227421	11643000	12190000	10081000	15905000	17072000	14969000
Crbn	1.27331	0.00316207	1141800	1163200	1085000	1526100	1687000	1590300
Ndrg3	1.27433	0.00480139	4812700	5261600	4683000	7071500	7731800	6176800
Fbxo18	1.27483	0.0258549	372570	378620	339140	452990	574120	524500
Ric8a	1.27575	0.0027794	4435800	4653400	4265800	6019600	6686200	6251700
Adam9	1.27678	0.0128292	1860900	2137000	2004700	2742700	3052100	2728100
Tmed4	1.27683	0.0205264	19921000	20226000	20254000	26593000	29873000	29428000
Gcc1	1.27729	0.000723352	5007600	5323500	4830000	7072700	7462200	6996100
Osbpl1a	1.27795	0.000533782	2104300	2197800	2038400	3077300	3129200	2811800
Uba1	1.27804	0.000277137	339510000	346370000	305180000	461850000	509760000	437920000
Rbm47	1.27899	0.00971558	5364000	5709000	4490000	7293700	8342100	6506600
Dnajb14	1.27905	0.0025252	4610400	4848400	4406500	6609700	7275400	5898600
Gpatch8	1.27922	0.01178	601220	696650	576040	864160	877250	916840
Casp7	1.27949	0.00393718	241910	233030	225770	322230	345110	329920
Ppm1f	1.28035	0.00034089	3362800	3305200	3085500	4708200	4859300	4329700
Sap30	1.28039	0.0193605	148480	149090	138000	184400	228400	209520
Srprb	1.2805	0.000172244	12898000	14083000	11697000	18377000	19028000	17556000
Fabp7	1.2811	0.00190578	23441000	24376000	21926000	32839000	33144000	33306000
Lgals8	1.2815	3.97599e-05	1782100	1781500	1550600	2474600	2540400	2268000
Eral1	1.28178	0.00153879	1844800	1913600	1508800	2526700	2594600	2354700
Nolc1	1.28218	0.000334011	20705000	22292000	18170000	29270000	29755000	27934000
Rps6	1.28218	0.0275637	255470000	262450000	236780000	318060000	379120000	381940000
Pde2a	1.2823	0.0220488	6137000	6954700	5891300	8311600	9142800	9601700
Lrrc59	1.2833	0.00336574	91482000	89451000	77825000	119410000	124460000	124630000
Rnf214	1.28361	0.0103907	352950	368220	351600	476050	539520	517830
Rps17	1.28398	0.00297232	156820000	156210000	131280000	201300000	233020000	199720000
Ikbkg	1.285	0.00896399	5082500	5484100	4512700	7400200	8062100	6156300
Ncf2	1.28506	0.000813457	111470000	117220000	102770000	160040000	172340000	142180000
Elmo2	1.28561	0.00423445	2180300	2355500	1932600	3361400	3094500	2790200
Tbc1d10a	1.28568	0.0020797	1138500	1308000	1022200	1668100	1721000	1550700
Cfl1	1.28638	0.000104907	945970000	996320000	848130000	1353400000	1348700000	1282800000
Hdgf	1.2868	0.000190651	49839000	51866000	46364000	71865000	75557000	64723000
Prr14	1.28683	0.0202954	107080	107900	77972	136850	144730	133380
Mical1	1.28691	0.021923	6969800	7330700	6814000	8958500	11333000	10058000
Lztfl1	1.28726	0.00740398	5115000	4875500	4511400	6521100	7143200	7089500
Nmnat1	1.28921	0.0205755	740120	817210	822550	1123500	1149800	1135600
Rqcd1	1.28929	0.0055501	4468900	5097500	4164400	6870200	7089000	5745200
Znf207;Zfp207	1.28974	0.0172507	3574800	3816800	2843500	4650300	4910100	5016300
Dnttip1	1.29088	0.00047012	178820	176570	166680	252380	263830	233970
Lrrfip1	1.29151	0.00428915	11216000	12275000	9544300	16223000	17101000	14042000
Lrrc25	1.29154	0.00417012	10166000	11943000	9918600	15053000	15695000	15112000
Ppp1r12a	1.29197	0.00344759	14712000	15125000	14623000	20568000	22763000	20625000
Hist1h2bb;Hist1h2br;Hist1h2bp;Hist1h2bk;Hist1h2bf;Hist1h2ba	1.29338	0.0202525	494090000	522820000	459520000	636560000	736640000	753750000
Ebna1bp2	1.29363	0.0127795	8652100	9375100	8749400	12550000	14792000	11390000
Ranbp3	1.29366	0.00266298	9960900	11394000	9161000	15098000	15609000	13145000
Scamp2	1.29446	0.00105774	9142500	10220000	9071000	13883000	14082000	12941000
Sarnp	1.29466	0.000413373	19990000	20448000	17278000	26965000	28882000	27082000
Clk3	1.29583	0.016155	527020	604840	476430	844240	723680	744340
Srp14	1.29631	0.00763612	18040000	19111000	18144000	24833000	29091000	25958000
Cpsf3l	1.29637	0.00359963	157540	180210	153400	245610	253130	210020
Cox4i1	1.29689	0.0163319	32047000	30301000	32151000	45674000	50231000	40852000
Flcn	1.29922	0.0150393	1115700	1127200	953190	1410600	1571800	1631700
Ctdp1	1.30047	0.0162425	1048400	1085900	968380	1435900	1778400	1306800
Rock1	1.30048	0.000214678	7298300	7681300	6985400	10580000	11260000	9949200
Pnp	1.3008	0.000407503	110560000	112470000	97466000	163510000	157410000	142640000
Nudt9	1.30095	0.0167717	8883400	10037000	9515700	13244000	13737000	14131000
Gamt	1.30159	0.00618182	6067500	5949000	5810000	8536600	8532000	8737600
Slc22a4	1.30195	0.00484985	397220	453260	399350	577190	630030	600520
Taf15	1.302	0.0141089	5668400	6311800	5960700	8322400	8703900	8942500
Otud6b	1.30226	0.0031962	2308900	2582200	2192700	3254200	3793500	3218700
Plek	1.30233	0.00274691	15689000	17328000	15381000	25072000	23883000	21227000
Cct5	1.30279	0.00028913	310030000	321320000	286600000	434110000	481190000	415900000
Bcl2l1	1.30422	0.00357325	411730	439550	392570	581820	605890	615290
Mad2l1	1.30444	0.0030469	1271300	1455100	1147000	1937600	1855300	1802900
Lmf2	1.30451	0.01539	4492200	4917000	3988000	5895400	6686500	6826500
Pid1	1.30456	0.00396541	13753000	13089000	11374000	18968000	18013000	18309000
Hsp90aa1	1.30467	0.000573764	237260000	253270000	224200000	350080000	374910000	313710000
Fmnl3	1.30473	0.00761209	2655300	2864200	2642900	3810600	3951500	4080100
Tap1	1.30569	0.000137041	9357900	9411800	8336400	12985000	13525000	12807000
G3bp2	1.30583	0.00541048	12920000	12530000	10256000	17459000	18994000	15343000
0610012G03Rik	1.30607	0.00358306	6319700	6569100	6125000	8721100	10218000	8748900
Dcaf13	1.30607	0.00937799	1961700	2142200	1890400	2893700	3341100	2519500
Dffa	1.30678	0.00628072	1472100	1605900	1381300	2018000	2462800	2017800
Cactin	1.30791	6.34776e-05	1102200	1103800	975670	1538400	1591400	1492800
Edc4	1.30843	8.19741e-06	9416000	9465100	8256000	13313000	13758000	12384000
Cd48	1.30922	0.00781713	7015600	6623900	6634000	10406000	10551000	8670600
Ptk2b	1.30951	0.00231677	28358000	29661000	28637000	41444000	44569000	40302000
Gm3839	1.31035	0.000398134	8518000	8899300	8048100	12317000	13438000	11413000
Mcee	1.31146	0.0042358	5028000	5603600	4817600	7449400	7390400	7653500
Rpl31	1.31203	0.0105666	87525000	84992000	78972000	110560000	135790000	121620000
Tmx1	1.31208	0.00181726	22870000	23911000	21625000	33969000	36642000	29535000
Tsc22d3	1.3124	0.00590125	186840	207060	180150	258120	299750	280200
Pdk1	1.31281	0.00034415	8100500	8515900	7524100	11443000	12229000	11549000
Rab3il1	1.3129	0.0027305	737210	773680	703090	1079000	1060900	1091000
Alkbh5	1.31418	0.0122122	204110	229230	171420	304530	279940	293860
Ube2k	1.31432	0.00349169	30277000	33839000	31307000	47448000	49817000	42399000
Ccdc115	1.31501	0.0191301	8735100	8709000	7868300	13109000	11202000	12756000
Limd1	1.31552	0.00612551	941990	965270	877520	1365100	1304900	1403500
Cc2d1a	1.31572	0.00127341	810420	922600	788050	1201200	1293400	1188700
Ghitm	1.31578	0.0273249	7715800	7479900	7331500	12422000	11792000	9056000
Bin1	1.316	0.00381248	43216000	45869000	41391000	61311000	64211000	65368000
Ctnnd1	1.31611	0.000524187	29603000	31249000	28338000	42589000	47133000	40968000
Phf3	1.31744	0.00829179	398780	406360	301640	535390	573810	500680
Ddi2	1.31773	0.00684315	13701000	15098000	13845000	22325000	22263000	18146000
Odr4;BC003331	1.31787	0.00370662	6345600	6025000	5936100	8582700	9516300	8752200
Mri1	1.31799	0.00393634	2901200	3403000	2913500	4438300	4924700	4146300
Eprs	1.31816	0.000585839	231260000	239040000	214890000	321690000	361550000	321920000
Fbxl8	1.31817	0.0124251	923270	1010400	812220	1295100	1297100	1421700
Sec61a2	1.32026	0.0143345	570680	647360	517660	960240	860820	732700
Rptor	1.3204	0.00615172	6381800	6819500	6312100	9029900	9809300	9824900
Znf622	1.32065	0.000114307	5068100	5238600	4672300	7634300	7640500	6741000
Mrps33	1.32071	0.00113355	1832400	1865900	1581000	2455400	2815300	2479000
Golga5	1.32082	0.000988043	18295000	19167000	17086000	25758000	27617000	26707000
Ppan	1.32158	0.00496675	175430	202740	185330	271410	295020	261490
Yme1l1	1.32503	7.92943e-06	12955000	13618000	11950000	18956000	19687000	18086000
Relb	1.32503	0.00291457	1164900	1345600	1199800	1882500	1864900	1715100
Nrp1	1.32557	0.00261057	1192000	1284600	1218400	1773000	1956600	1724000
Lrrc47	1.32566	3.54884e-05	39751000	41678000	37068000	57849000	61712000	55154000
Mccc1	1.32764	0.0012383	4420500	4915500	4377000	6568900	7110300	6557700
Zfc3h1	1.32777	0.0239154	419320	525870	460390	639190	731380	699540
Msrb2	1.32823	0.0152979	754830	854480	729500	1221900	1057600	1174100
Mllt4	1.3293	7.96425e-05	12060000	13013000	11414000	17940000	18771000	17195000
Mief2	1.32999	0.0245688	164380	147220	114690	199170	215420	209440
Camkk2	1.33067	0.00141612	1695100	1906000	1609700	2634400	2781300	2301500
Pak2	1.3307	0.000896096	75536000	84096000	70822000	109400000	122420000	108930000
Alyref	1.33154	0.00686115	12352000	14467000	11303000	18738000	18368000	19066000
Oasl1	1.33424	0.000955626	1938800	2020600	1892500	2831900	3012700	2840600
P3h1;Lepre1	1.33447	0.00319181	1682600	1834300	1477800	2355200	2520000	2513300
Acsl3	1.33549	0.000702062	9242500	9796800	8622200	13118000	14962000	13039000
Mrpl24	1.33591	0.00912238	6174200	6635300	6254400	10177000	10220000	8082300
Rpl30	1.3367	0.000111996	119430000	128580000	107320000	178550000	187420000	161870000
Gbp4	1.33778	0.00261452	2201700	2310000	2217500	3336200	3362800	3312300
Gtf2e2	1.33816	0.00394797	2285800	2775100	2218800	3540700	3754400	3491400
Arhgdia	1.33834	0.000160871	178550000	195690000	167500000	264890000	282940000	257620000
Abca3	1.33881	0.00103796	1557200	1603900	1397600	2393800	2409600	1998500
Eif1ax	1.34011	0.000733158	13622000	14175000	12644000	19795000	22269000	18342000
Itsn1	1.3409	0.022357	8640700	8929300	8430200	11561000	13279000	14057000
Khsrp	1.34125	0.00153435	47931000	50206000	41466000	70817000	67768000	69044000
Hsd17b8;H2-Ke6	1.34158	0.001884	6947100	7157900	6845600	10084000	10882000	10308000
Slc11a2	1.3417	0.000668413	2719100	2840600	2533700	4274800	4208200	3616000
Tmx2	1.34451	0.00122247	5836100	5662100	5307600	8220900	9249900	7714500
Stx12	1.34465	0.000152839	13119000	12948000	11265000	18286000	19491000	17963000
Dgkh	1.34499	0.0124811	314940	354120	293510	547880	484460	412960
Cd2ap	1.34618	0.0102908	14931000	14409000	11918000	21703000	22838000	17367000
Rps15	1.34648	0.0144878	19972000	24710000	21368000	31078000	37065000	30755000
Rsl1d1	1.34754	5.59952e-05	19228000	20072000	16776000	28908000	28889000	26108000
Pmpca	1.35061	0.000190577	32335000	33794000	31241000	48891000	51384000	46073000
Txn2	1.35118	0.0149923	2769300	3286300	2512000	4089000	5013500	3785700
Abcd3	1.35142	0.00293654	4307500	4335000	4379900	6540200	6798000	6248200
Pfas	1.352	0.00054322	9134500	10374000	8864700	14182000	14772000	13637000
Ttc9c	1.35221	0.0170273	1976100	2100700	1769200	3135600	2628600	3031800
Emr4	1.35327	0.00704723	1927900	1940100	1814600	2935900	2684900	2936600
Kiaa2013	1.35336	0.0041178	875140	808170	751230	1158800	1261400	1240000
Pex5	1.35422	2.4757e-05	2429600	2624400	2265700	3702800	3822100	3488900
Gne	1.35479	0.0197729	4930000	5560700	5412900	7220200	8666700	8115300
Fam207a	1.35532	0.00161307	490730	519810	450350	793070	767050	647010
Rnf149	1.35599	0.000467397	4998400	5194600	4673600	7256300	7731400	7421700
Itgax	1.356	0.00379436	15844000	16297000	16406000	24913000	24732000	23590000
Ldha	1.35607	0.00619764	556230000	565450000	453990000	805290000	893030000	681380000
Zdhhc5	1.35662	0.00788513	146120	154830	144700	204970	237170	231380
Tiprl	1.35779	0.000367782	12208000	12833000	11479000	17747000	19915000	17529000
Cd3eap	1.35856	0.000724623	739050	806920	653380	1121700	1103300	1086500
Poldip3	1.35871	0.00313237	1971300	2074300	2029200	2959300	3301100	2932000
Usp8	1.35912	3.65022e-06	12009000	12790000	10954000	18180000	18757000	17047000
Rsl24d1;Gm20509	1.35942	0.00252408	168560	199720	164700	278210	267520	257560
Dtx2	1.36024	0.023157	196340	216420	192560	303180	370190	252500
Gpt2	1.36117	0.00120837	1085200	1110100	877040	1526300	1663600	1444200
Slk	1.36214	0.000208909	60586000	65210000	57037000	90424000	99854000	86805000
Kdm3b	1.36279	0.00390549	2188300	2451500	1894100	3367100	3637600	2889600
Fez2	1.36279	0.0110876	946990	1152100	1073000	1634200	1634600	1526400
Synrg	1.36319	0.00152683	1085100	1201900	940630	1602800	1786400	1493700
Rgs19	1.36411	0.000210402	4807000	4768200	4295000	7109500	7059700	6851400
Arhgef7	1.36458	0.00493272	236340	283540	229620	394720	409480	332900
Rpl21	1.36464	0.00109576	236740000	256740000	212910000	345850000	398030000	328760000
Nf2	1.3648	0.0160708	97188	85542	86722	122790	150630	136370
Acaa1a;Acaa1b	1.3649	9.71194e-05	90761000	98803000	87043000	140440000	146390000	132860000
Map3k2	1.36502	0.00056612	274520	298560	273310	424860	447700	412240
Znf787	1.36539	0.000349276	1338700	1315100	1145300	1866900	2010600	1881700
Cebpz	1.3686	0.00849296	1381700	1435500	1147900	1811500	2142000	2070000
Cc2d1b	1.36961	0.000466996	4527200	4878100	3854800	6802600	6860400	6449500
Sart1	1.36991	0.000667583	6217100	7149000	5950400	9665400	10370000	9335600
Gch1	1.36996	0.00227157	3182200	2999800	2900900	4584500	5116500	4177200
Lipe	1.37018	0.000600876	2213600	2335900	2106000	3534400	3344100	3261600
S100a11	1.37054	0.00350824	218970000	218200000	218200000	332460000	333420000	333230000
Rcn2	1.3707	0.000276454	6837900	7441900	5977500	10302000	10976000	9533200
Gtf3c2	1.37205	0.000984112	1131400	1274400	1100200	1878600	1784500	1682000
Vapa	1.37216	0.000384217	93146000	98198000	80524000	138660000	150280000	125670000
Zranb2	1.37226	0.00282106	1741100	1798100	1618700	2432400	2770900	2673800
Atad1	1.37235	0.000117137	11960000	12365000	10949000	18034000	19458000	16413000
Clns1a	1.37282	0.00178982	2669200	2984200	2459400	3909000	4579800	3896300
Tsn	1.37337	0.0128136	25611000	28493000	26629000	37265000	43180000	43051000
Wash1	1.3737	0.000166022	8068500	8290900	7368600	11740000	12631000	11859000
Pdap1	1.37414	0.000756666	18154000	19571000	16745000	26350000	29351000	27468000
Rsrc2	1.37514	3.23447e-05	797490	826180	720120	1200700	1283600	1101700
Abi1	1.37519	0.00653209	53297000	50052000	39449000	72858000	78837000	65574000
Gmfg	1.37533	0.00238206	52736000	52486000	46256000	85216000	75962000	70808000
Spcs2	1.37547	0.00584376	27868000	28692000	29086000	41697000	48075000	41546000
Tfip11	1.3773	0.00952956	1589300	1843500	1805700	2668700	2753100	2589000
Impa2	1.37766	0.000349932	6766100	7572900	6646300	10722000	11219000	10187000
Fus	1.37793	0.00475375	59521000	65094000	51583000	96398000	97163000	76825000
Gnpnat1	1.37862	0.00391894	4430000	4874700	4158700	6780300	7909500	6038600
Tmem55a	1.37966	0.000322205	468420	502840	458390	759260	751310	684000
Stxbp1	1.37989	0.00827936	1218800	1350800	1271100	2032600	1862600	1998600
Rabep2	1.38016	0.00118459	4045700	4511300	3920500	6124000	6651600	6355500
Smap1	1.38109	1.12332e-05	20327000	20825000	17907000	30466000	32145000	28060000
Mrpl12	1.382	0.000539711	44080000	41586000	37671000	61961000	65714000	61607000
Hsd17b7	1.38223	0.00460798	2347200	2309500	2164700	3265100	4029600	3241100
Nfkbib	1.38237	0.000362127	373000	384150	355050	595830	572550	542150
Rpl8	1.38268	0.00390343	95299000	103580000	91457000	135960000	164420000	146920000
Tcp1	1.38298	6.47136e-05	176800000	191940000	158390000	268700000	285480000	255060000
Coro1b	1.38351	0.00019821	197510000	206630000	185760000	293320000	324100000	290650000
Tmed10	1.38355	0.000829955	105150000	102220000	89917000	145130000	166130000	146100000
Ttc4	1.38441	0.000879702	2760800	3056100	2598400	4129400	4517000	4292100
Wdr92	1.38562	0.00224822	896770	941200	836680	1267000	1503600	1357100
Bcap29	1.3859	0.00428293	19377000	19814000	17504000	32332000	30542000	24930000
Fxr2	1.38792	0.000394725	6777200	7397600	6404900	10602000	11572000	9629900
Rpl39	1.38839	0.0206485	5812600	4800200	4658800	7019200	8636600	7897700
Pgam1	1.3884	7.33373e-05	412580000	425100000	366860000	630840000	665780000	564250000
Rplp2	1.38958	0.0105793	148370000	142350000	115440000	219450000	234450000	174990000
Mrps18a	1.39014	0.00747324	3541700	3595200	3637800	5399700	5515400	5749800
Ppme1	1.39171	0.000182684	9995000	10464000	9634900	15407000	16621000	14597000
Ntan1	1.39429	0.00134349	3207700	3547200	3264000	5022400	5587400	4936600
Mesdc2	1.39482	0.00227041	7909200	9305200	7052200	12999000	13054000	11422000
Efr3b	1.39689	0.00806409	110130	111300	99491	168750	153960	176070
Mapre1	1.39727	9.19015e-05	129180000	126650000	109580000	188020000	200870000	178210000
Hs1bp3	1.39789	2.48267e-05	7388100	7809000	6799600	11724000	11990000	10491000
Hgh1	1.39807	0.0215207	279490	303630	259920	402410	417200	494080
Ctbp2	1.39936	0.00213331	6130000	7061300	5974200	10170000	9701200	9884500
Fkbp15	1.40016	0.000312372	17135000	19350000	16646000	28046000	29050000	25589000
Arid3a;Arid3c	1.40032	0.0131962	201990	182620	194540	325720	283460	293700
Abcc5	1.40084	0.000571555	7883500	9100800	7321000	12717000	13347000	11707000
Dlat	1.40105	0.000147999	111840000	116030000	94891000	167710000	179150000	155120000
Sp1	1.40239	0.00328372	1466300	1530700	1398000	2210600	2254500	2389600
Ndufb9	1.40279	0.00435102	18776000	19888000	19279000	28557000	34035000	28138000
Rbm10	1.40347	0.000743888	1805900	1968400	1802800	2822000	3051600	2831100
Pih1d1	1.40363	0.00273536	448420	528580	470030	778740	756390	719830
Tln2	1.40519	0.00303125	17692000	17516000	17916000	26983000	30055000	26141000
Adck1	1.4056	0.000526735	1061700	1201500	1014700	1731900	1715500	1664900
Rabggtb	1.40671	0.000944689	5240500	5949400	4936000	8014600	9005700	8168000
Inpp5f	1.40702	0.0287767	433200	488010	504520	680220	751090	800330
Spg20	1.40837	0.00272226	4724800	5179500	4117000	7857800	7793100	6325300
Irf2bpl	1.40881	0.0165434	958950	893770	951150	1387200	1438000	1572500
Emc6	1.40904	0.00366383	1486700	1358900	1325600	2189400	2443900	1926900
Slc7a1	1.40918	0.0169044	1146200	1517100	1231500	2239800	2045300	1800200
Lzic	1.40947	0.00287964	7688700	8703700	7222900	12647000	13797000	10674000
Bola1	1.41019	0.00901725	497600	503140	474210	819150	704060	794470
Mvk	1.41113	0.00537573	407510	424130	390340	668390	595040	655970
Hk2	1.41222	0.000147795	63965000	65823000	56706000	102210000	97323000	93032000
Stx16	1.41239	0.00117416	408710	447050	372860	646280	629130	649690
Ppfia1	1.41241	0.0208328	2166100	2269800	2019800	3052100	3287000	3838300
Bod1l	1.41287	0.00988795	452000	549220	408480	709060	720880	770000
Ubac2	1.41452	8.68988e-05	2633600	2671500	2464000	4016500	4331000	3881600
Drg2	1.41504	6.31281e-05	24910000	26602000	23217000	39004000	42284000	36373000
Trim12c;Trim5	1.41555	3.6053e-05	1607100	1713000	1529800	2551700	2650300	2430800
Srsf1	1.41634	0.0136789	77676000	82327000	72270000	114590000	116190000	135730000
Bin2	1.41692	3.90457e-05	12028000	12367000	11151000	18376000	19650000	17984000
Syngr1	1.42209	0.0012262	1239400	1426700	1206400	2063700	2235700	1830000
Uck1	1.42374	0.000455972	937270	994910	905780	1466100	1648000	1388400
Mrps5	1.42397	0.00072059	3850700	3883400	3513600	5659100	6619800	5573000
Psen2	1.4247	0.0149968	956170	898930	890970	1703800	1452300	1231600
Fam102a	1.42471	0.000523641	1358900	1444100	1168500	2046900	2135100	2088000
Cnot10	1.42646	0.000502804	1481000	1613000	1334600	2224500	2524700	2267500
Ggcx	1.42732	0.00388067	973870	997630	898990	1438400	1782400	1363200
Pck2	1.42749	2.50602e-05	13251000	13097000	11599000	19913000	21224000	19066000
Mrpl4	1.42894	0.00174084	21768000	20296000	18562000	31963000	35967000	28642000
Smg8	1.42965	0.00013894	1553400	1549600	1287300	2362100	2386200	2210800
Crk	1.43131	0.00266244	9543600	11001000	9222100	17130000	15229000	14977000
Lrrk1	1.43158	0.00195714	448940	507090	419300	699510	735520	749100
Cyhr1	1.43169	0.00540124	481720	611100	511190	829910	882950	829310
Mtfr1l	1.43174	0.000127456	2847300	2861800	2379100	4255000	4445300	4139700
Tbce	1.43211	0.000529918	23441000	26778000	21624000	38871000	40760000	34626000
Acin1	1.43241	1.77483e-05	12789000	13412000	11791000	19879000	21174000	19434000
Mtmr1	1.43266	0.000273957	542870	613140	496820	863250	932130	831680
Vps25	1.43341	8.70381e-09	16596000	17202000	14958000	26178000	27133000	24367000
Ubl7	1.43377	0.00580401	182630	176490	185040	302280	279780	286060
Actr1b	1.43421	0.00163023	8281000	9928700	8044800	13501000	14675000	13554000
Pex1	1.43805	0.00230608	419580	461420	415250	651800	711260	709690
Cops3	1.44043	0.000298066	19056000	21706000	18640000	31728000	32961000	30322000
Mthfd1	1.4407	4.42043e-05	90854000	97638000	86728000	147060000	155930000	138060000
Ap3s1	1.44082	0.000251907	5984600	6670100	5707200	9545300	10317000	9522900
Vamp8	1.4416	1.21837e-05	16901000	18168000	15673000	27783000	28050000	25461000
Sqstm1	1.44198	0.00641302	10233000	12180000	11593000	17823000	18765000	17827000
Trafd1	1.4422	0.00047375	975170	926090	877580	1562500	1509800	1386900
Ralgapa1	1.4422	0.00277173	858510	975630	901240	1390600	1609500	1392400
Slc9a1	1.44302	0.00117972	1606900	1770900	1509700	2732800	2855000	2276900
Acsf3	1.44311	9.48585e-05	6563200	7115000	5901900	10902000	10621000	9844000
Fastkd5	1.44316	0.004029	440560	446930	464890	703090	790800	680980
Sart3	1.44368	5.36433e-05	9337800	10200000	8541400	15065000	15409000	14512000
Taf10	1.44429	0.00198926	112210	115450	94621	174130	165640	176200
Alg9	1.44476	0.0247216	132650	175850	146130	247540	221980	257460
Ccdc186	1.44544	0.026095	4465500	4892800	3985500	8051500	8224100	5465200
Sssca1	1.44561	0.00035967	4388500	4483900	3842400	6622900	7573900	6266700
Ahnak2	1.44648	0.00099192	6621200	7121400	6023100	11364000	11259000	9245100
Adck4	1.44667	0.0032518	1017700	911370	894850	1418300	1630800	1495200
Pde12	1.44825	0.000908288	4831500	5581700	4619600	7709600	8672500	7788800
Timmdc1	1.4486	0.000756052	1298800	1422700	1177600	2250600	2175100	1859400
Kdm1a	1.44971	0.0012389	2093500	2388200	2004500	3317800	3612200	3506300
Rab1b	1.45059	0.000698139	34198000	35353000	31012000	51078000	60479000	50981000
Stmn2	1.45219	0.00419365	976200	1150200	894950	1526300	1650900	1680700
Dido1	1.45251	0.00807542	167310	218060	179340	294060	335940	279330
Acot8	1.45818	6.20204e-05	3916400	4062500	3400700	6330000	6191600	5890300
Ddx24	1.46244	0.00190362	76062	85050	63439	121980	120600	120080
Macf1	1.46257	0.00139392	1787100	1889800	1833500	2871000	3182900	2917600
Fam63b	1.46331	0.00519844	310230	397600	304250	560170	538450	536540
Rilpl1	1.4655	0.000520407	6940200	6992900	6403300	10480000	11648000	11027000
Rrp1b	1.46608	0.00257445	1277000	1511600	1329200	2134200	2334700	2232900
Nars2	1.46768	0.00177481	2656300	2752800	2466700	3981500	4443000	4436500
Zfand5	1.46899	0.000794398	733210	744420	617690	1209100	1216600	999890
Clint1	1.469	2.22067e-05	19283000	20914000	17290000	31453000	32902000	29394000
Polr1a	1.46918	0.000227036	1934000	1975900	1698200	2985400	3101700	3058700
Trim21	1.47099	0.000966769	1531000	1599200	1452000	2512500	2436900	2543200
Son	1.47154	9.73803e-05	4476500	4898600	4078900	7493800	7388600	7083400
Rpl7	1.47367	0.00257297	177000000	192210000	185880000	289260000	337870000	284990000
Phf10	1.47381	0.0252421	732720	810590	681160	1079700	1157500	1426100
Tnip3	1.47403	0.0157763	431030	475820	407620	648350	694980	817770
Ankzf1	1.47423	0.000274083	874180	970620	800940	1394300	1566500	1371900
Wipf1	1.47428	0.00020574	32022000	33705000	29013000	50433000	57299000	47788000
Gsk3a	1.4743	0.000383198	4137300	4633900	4128800	7273800	7436200	6453900
Sipa1	1.47454	5.7299e-06	12084000	12356000	10537000	19031000	20228000	18032000
Rbsn	1.47487	0.00230108	476010	554330	477580	848460	794160	825710
Srd5a3	1.47537	0.0118433	2259500	2583100	2274800	3565700	4773800	3447300
Ireb2	1.47552	3.28793e-05	2568300	2684200	2439600	4188600	4464700	3976000
Hexim1	1.47566	0.0124959	2115600	2765900	1867300	3597500	3615400	3714800
Slc43a2	1.47592	0.0135935	2018000	1938300	1729800	3748700	3054600	2614500
Kbp;2510003E04Rik	1.4761	0.000924303	1867300	2134000	1856100	3377900	3162600	3064200
Fam195a	1.47676	0.013382	704060	765540	682560	1262800	1032000	1251100
Arg1	1.47721	0.00142808	1425700	1637800	1465200	2558400	2444700	2426500
Ttyh2	1.48027	0.00134153	1646000	1687400	1364500	2750600	2748000	2238000
Capg	1.48243	0.00019799	134760000	150790000	131300000	225600000	239110000	221750000
Mrpl28	1.48368	0.00675867	1926100	2078400	2104900	3235100	3343200	3501700
Aldh18a1	1.48407	0.000216635	22239000	22650000	19348000	36859000	37821000	31448000
Lrmp	1.48657	0.000498272	184230	183560	157250	308970	304000	255950
Acsl4	1.48695	0.000253703	46743000	47334000	40737000	72827000	82477000	67889000
Hmox1	1.48761	6.97825e-05	71258000	72861000	66858000	119590000	123630000	106360000
Nmt1	1.4884	5.84302e-05	64423000	67405000	57007000	102740000	113280000	96519000
Pds5a	1.4884	0.00231188	4344500	4682200	4226600	7049100	7205600	7681600
Acadl	1.48854	0.000266159	39571000	38919000	32885000	61208000	66991000	56061000
Cttnbp2nl	1.49184	0.000167266	5335600	5449400	4393000	8592700	8745200	7766900
Pkm	1.49271	0.000145217	1387200000	1474800000	1284900000	2201100000	2429600000	2249900000
Rpl23	1.49304	0.000492512	138830000	139670000	123280000	212860000	249770000	205930000
Pik3ap1	1.49322	9.82476e-05	11106000	10933000	9838400	18391000	18592000	16008000
Stk24	1.4957	0.000104383	21983000	24387000	21311000	37593000	38713000	36149000
Bclaf1	1.49626	6.96656e-05	9714100	10476000	8548700	16345000	16138000	15204000
Jmy	1.4983	0.0204512	98419	99564	117810	166540	177910	180340
Ap4e1	1.4986	7.60528e-06	1888100	1948400	1668400	3032200	3172000	2955600
Lage3	1.49924	0.00297167	714580	774010	779460	1219300	1367200	1199300
Sts	1.49961	8.39959e-05	3666400	3597900	3321300	5951300	6322700	5403500
Klra2	1.50063	1.79898e-06	1533600	1556200	1389700	2537600	2608600	2330000
Smarcc2	1.50085	3.81077e-05	17409000	18034000	15965000	28106000	29574000	28054000
Rnf181	1.50167	0.0058963	1009500	1240900	1016800	1653000	1910400	1879700
Bag3	1.50208	0.000145253	2976200	3330400	2734200	4926700	5390900	4759100
Slc5a3	1.50428	0.0145442	74604	79682	54840	132590	115840	99430
Thrap3	1.50621	0.000877229	16018000	17951000	15493000	27493000	27196000	28019000
Rbmxl1	1.50801	0.0141698	36753000	39333000	29375000	64574000	66785000	46471000
Pip4k2b	1.50806	0.00026303	2638200	2714500	2358900	4070100	4673800	4191600
Stx8	1.50849	2.99195e-05	11320000	11637000	10417000	18320000	19450000	18192000
Ascc2	1.5095	0.00271751	4064000	3643200	2991300	5990200	6029500	5804400
Ylpm1	1.51003	0.0129909	970750	1043000	1057900	1733900	1574900	1858600
Pdk2	1.51005	0.000241425	1100700	1110900	1007400	1822600	1985000	1613400
FAM120A	1.51151	4.73545e-05	31052000	34128000	29158000	52163000	56309000	49998000
Aak1	1.51173	0.000213088	6240800	6548300	5802600	9914200	11345000	10024000
Srek1	1.51299	0.000397052	447590	423820	417150	719340	755520	693990
Asns	1.51429	0.00134454	51871000	49664000	42093000	79390000	91081000	71661000
Hnrnpdl	1.51527	0.00537196	11912000	13528000	11553000	20981000	19193000	22135000
Gigyf2	1.51573	1.43531e-05	6736400	6927900	5915400	11038000	11801000	10156000
Predicted gene 45808	1.51691	2.1864e-05	8592900	9040400	8197500	14758000	15014000	13806000
Zcchc11	1.51713	0.0259297	101750	90371	85302	136450	150400	183680
Fam76a	1.51819	0.0179088	95605	90874	63635	154150	129800	133060
Gapdh	1.51831	0.00151678	825820000	851390000	770990000	1253900000	1516500000	1373100000
Mtatp8	1.51846	0.0080451	29944000	33361000	34272000	51171000	62218000	51814000
Pdlim2	1.51861	0.000146095	2187400	2291000	1969100	3656900	3604100	3608400
Pdia6	1.51941	0.00309764	67723000	72734000	69513000	110790000	120650000	123650000
Ppp1r11	1.52004	0.00178074	2142500	2338100	2005100	3337400	3869200	3759500
Slc7a5	1.52016	4.78449e-06	591670	618460	528160	1011500	1009400	915070
Cers6	1.52312	0.0182068	10033000	11897000	12301000	17217000	21094000	19659000
Eif1ad	1.52329	0.00161691	1846300	2217300	1755000	3265400	3646000	2935400
Txlna	1.52343	0.000585599	5835500	6700800	5757400	9959300	10764000	10218000
[truncated: 563 more rows]
